# Supplementary material
Source: MDPI journal article supplement (https://www.mdpi.com/2073-4344/12/6/578)
Supplement: s1 [file s1]

---

## Supplementary Materials

# Synthetic and DFT Modeling Studies on Suzuki–Miyaura Reactions of 4,5-Dibromo-2-methylpyridazin-3(2H)-one with Ferrocene boronates, Accompanied by Hydrodebromination and a Novel Bridge-Forming Annulation In Vitro Cytotoxic Activity of the Ferrocenyl–Pyridazinone Products

Nour-Eddine El Alaoui <sup>1</sup>, Mohammed Boulhaoua <sup>1</sup>, Dániel Hutai <sup>1</sup>, Rita Oláh-Szabó <sup>2</sup>, Szilvia Bősze <sup>2</sup>, Ferenc Hudecz <sup>1,2</sup> and Antal Csámpai <sup>1,\*</sup>

- <sup>1</sup> Department of Organic Chemistry, Institute of Chemistry, Eötvös Loránd University (ELTE), H-1117 Budapest, Hungary; nour-eddine1990@live.fr (N.-E.E.A.); mboulhaoua@student.elte.hu (M.B.); hutaidani@gmail.com (D.H.); ferenc.hudecz@ttk.elte.hu (F.H.)
- <sup>2</sup> ELKH-ELTE Research Group of Peptide Chemistry, Eötvös Loránd Research Network (ELKH), Eötvös Loránd University (ELTE), Budapest Pázmány P. Sétány 1/A, H-1117 Budapest, Hungary; rita.szabo@ttk.elte.hu (R.O.-S.); szilvia.bosze@ttk.elte.hu (S.B.)
- \* Correspondence: csampai@caesar.elte.hu; Tel.: +36-1-372-2500-6591

### Content:

S.1. Copies of the 1D- and 2D-NMR spectra pp. 2 – 14

S.2. Copies of the <sup>1</sup>H- and <sup>13</sup>C-NMR spectra of the deuterated products. pp. 15 – 16.

S.3. Bonding orbitals contributing to Fe-Pd interaction in compounds 20a, 23a, 24a and 27a pp. 17-17.

S.4. XYZ coordinates of the structures optimized by B3PW91/DGTZVP method pp. 18 – 104.

## S.1. Copies of the 1D- and 2D-NMR spectra

### $^1\text{H}$ NMR of 6

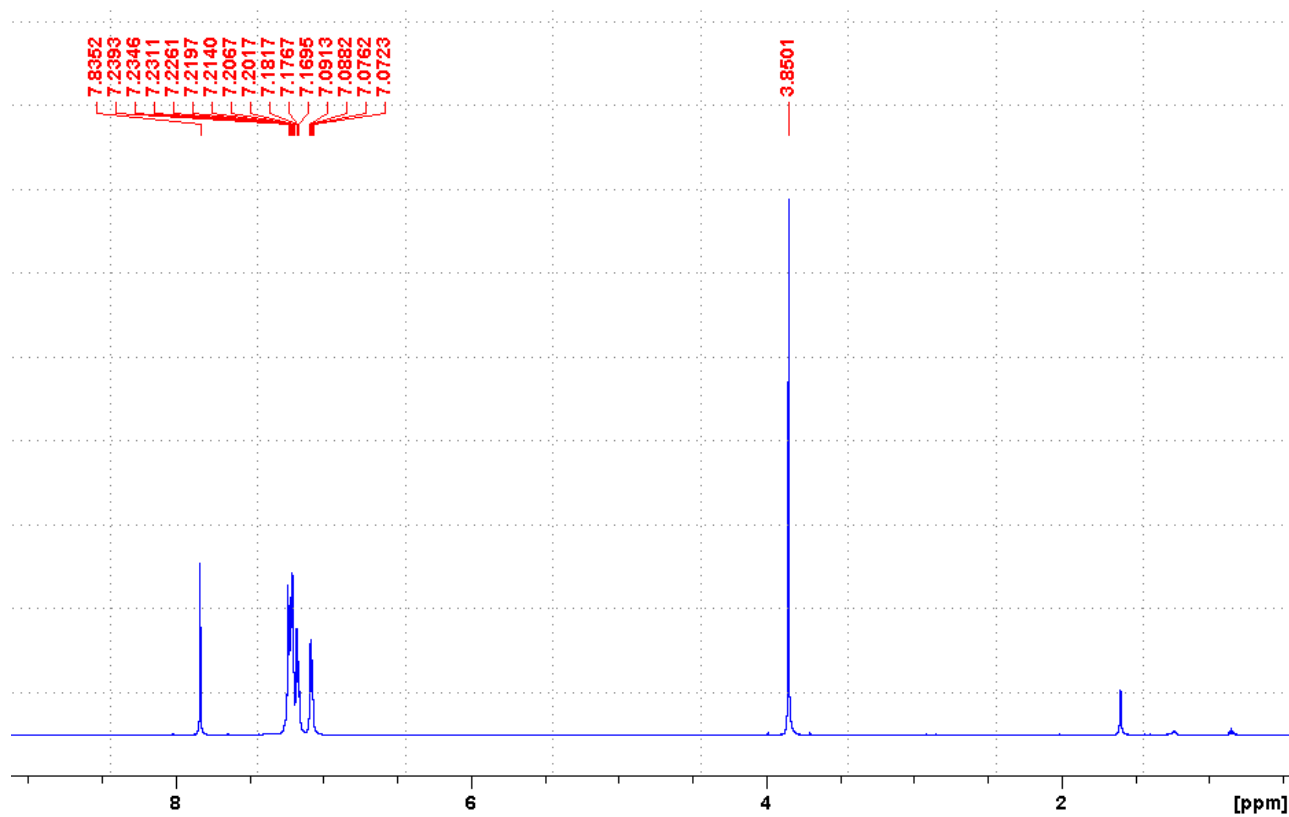

### $^{13}\text{C}$ NMR of 6

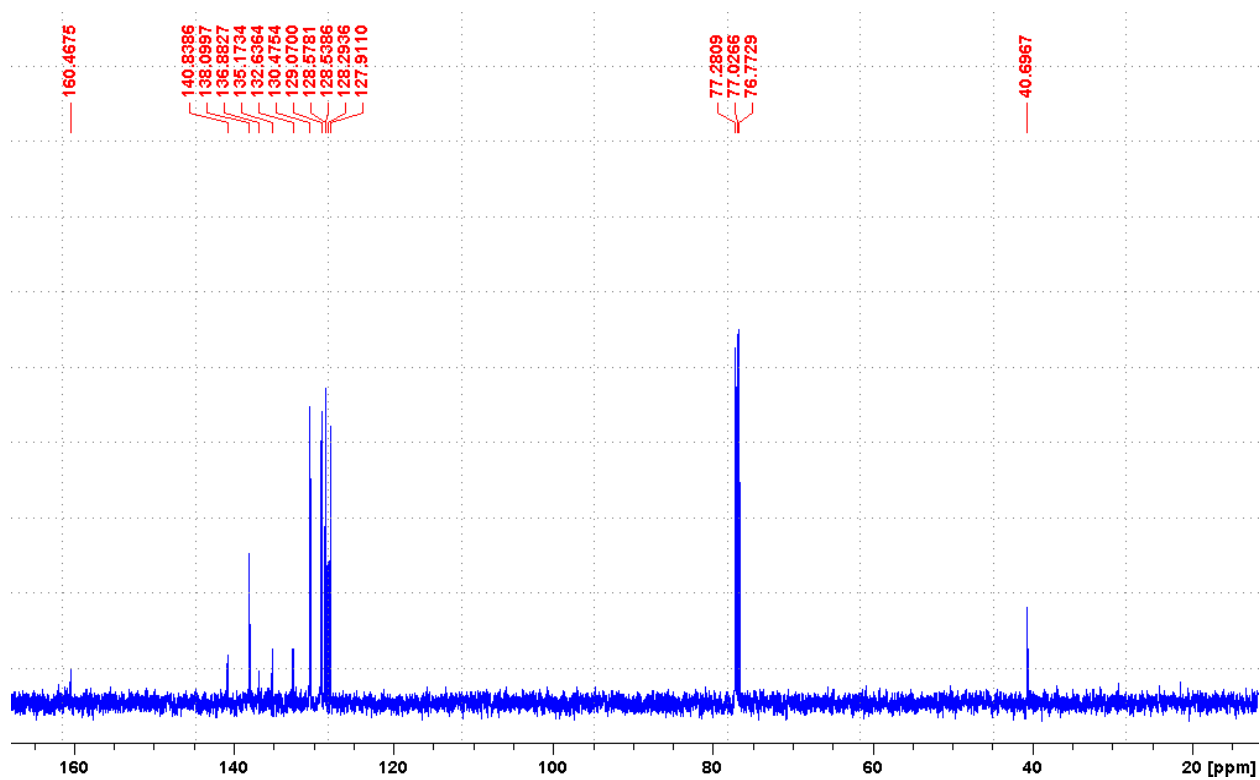

# HMBC of 6

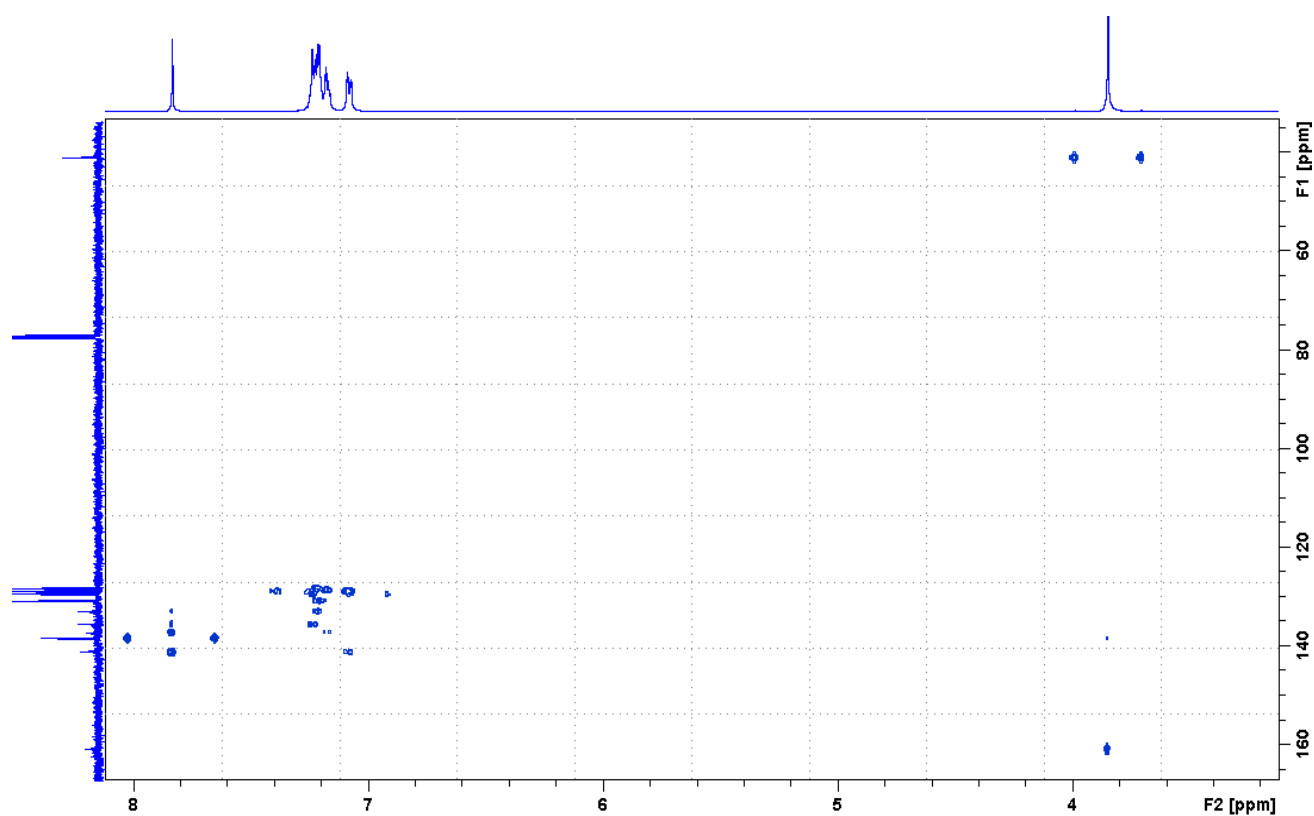

## <sup>1</sup>H NMR of 7

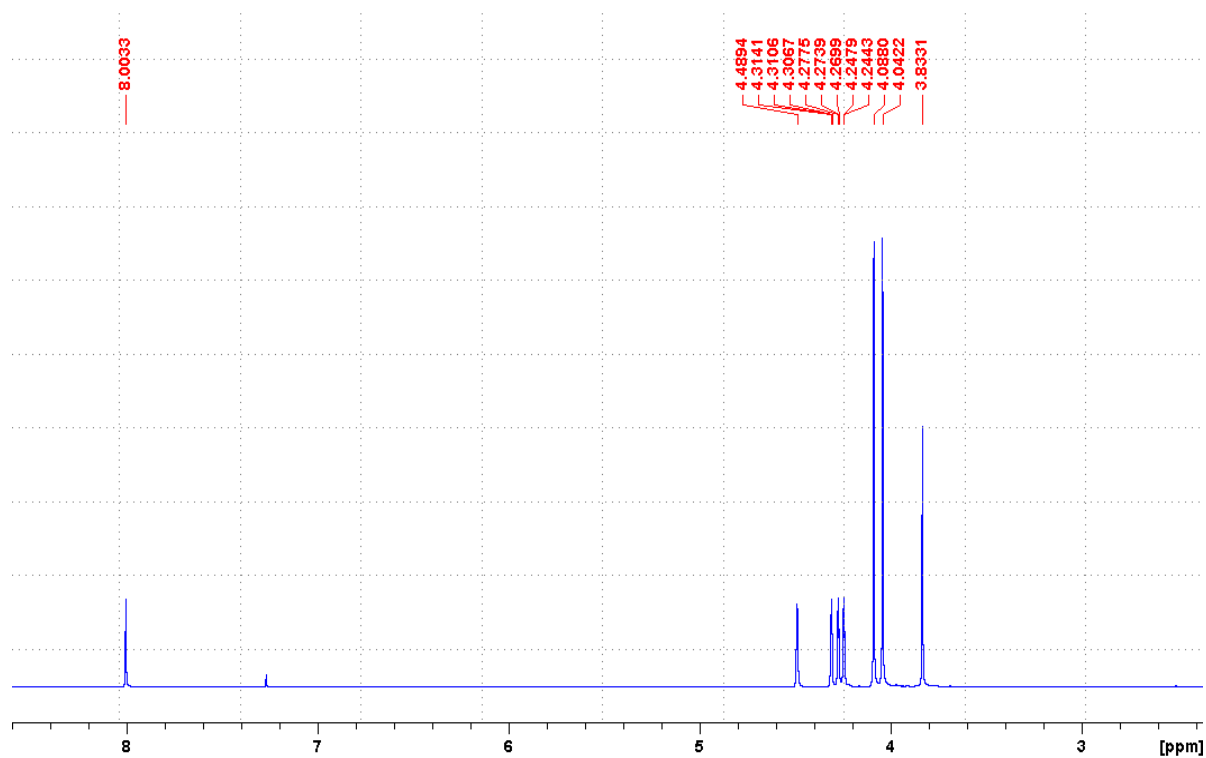

<sup>13</sup>C NMR of 7

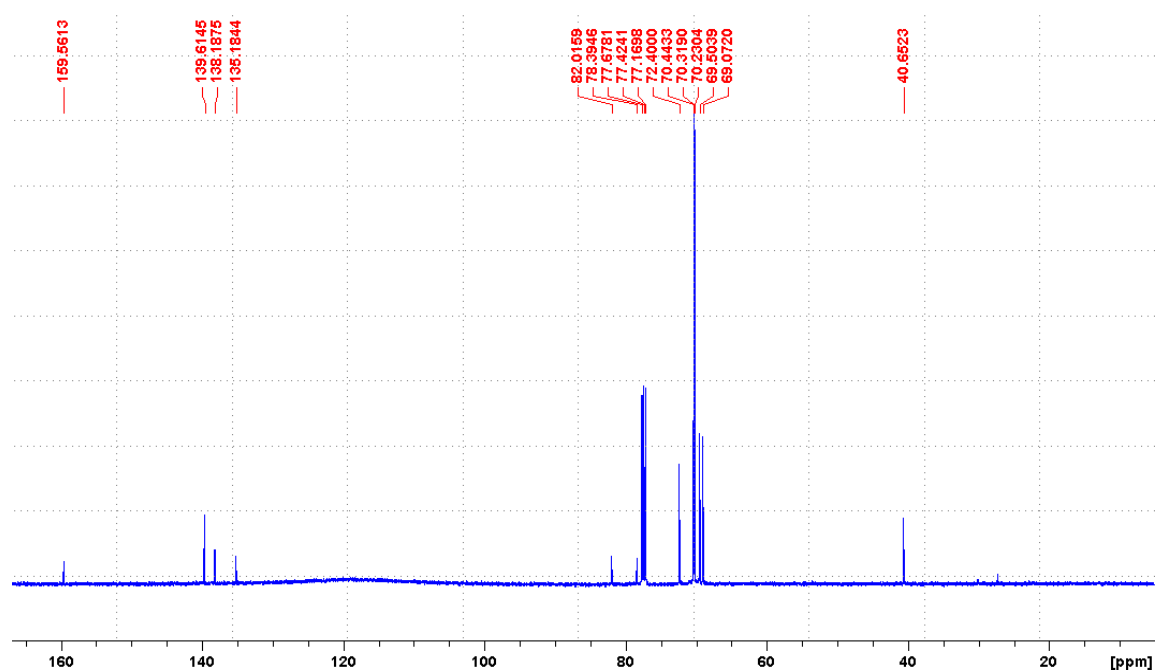

DEPT<sub>135</sub> of 7

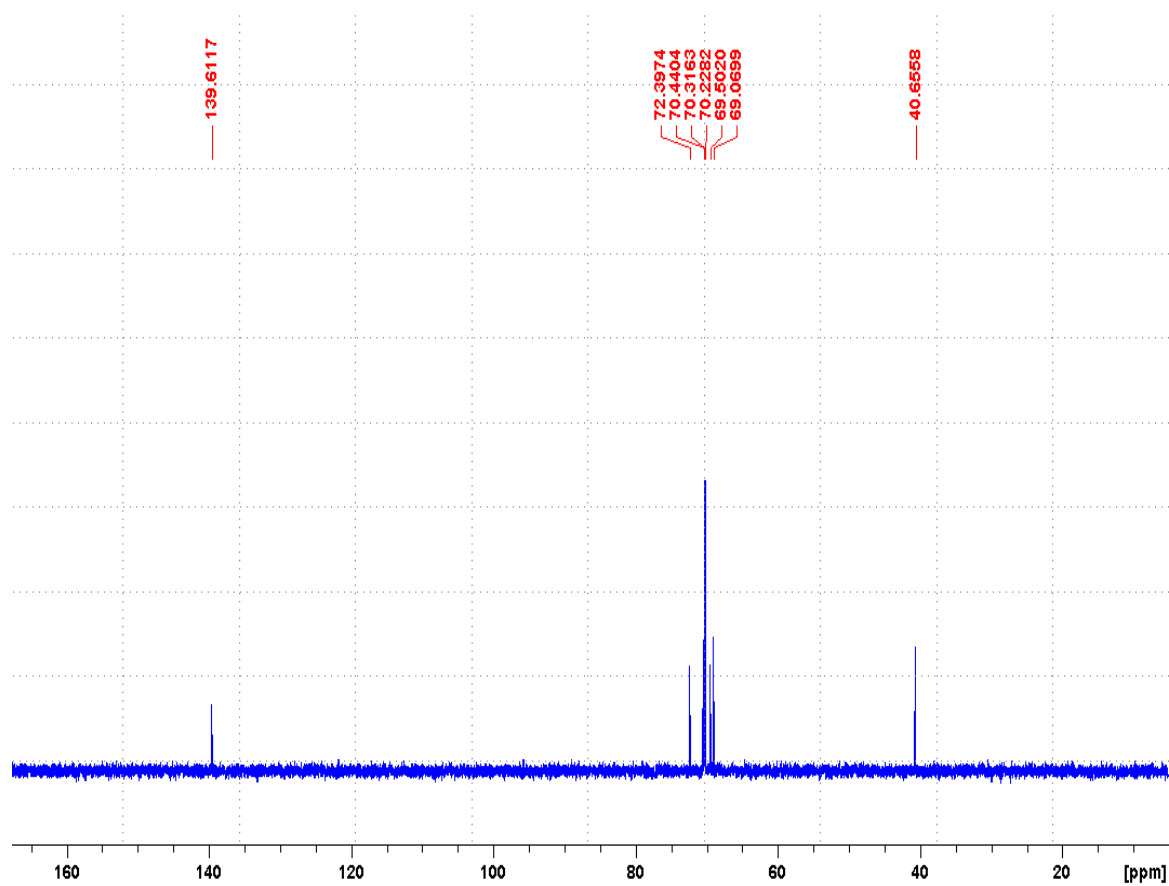

HSQC of 7

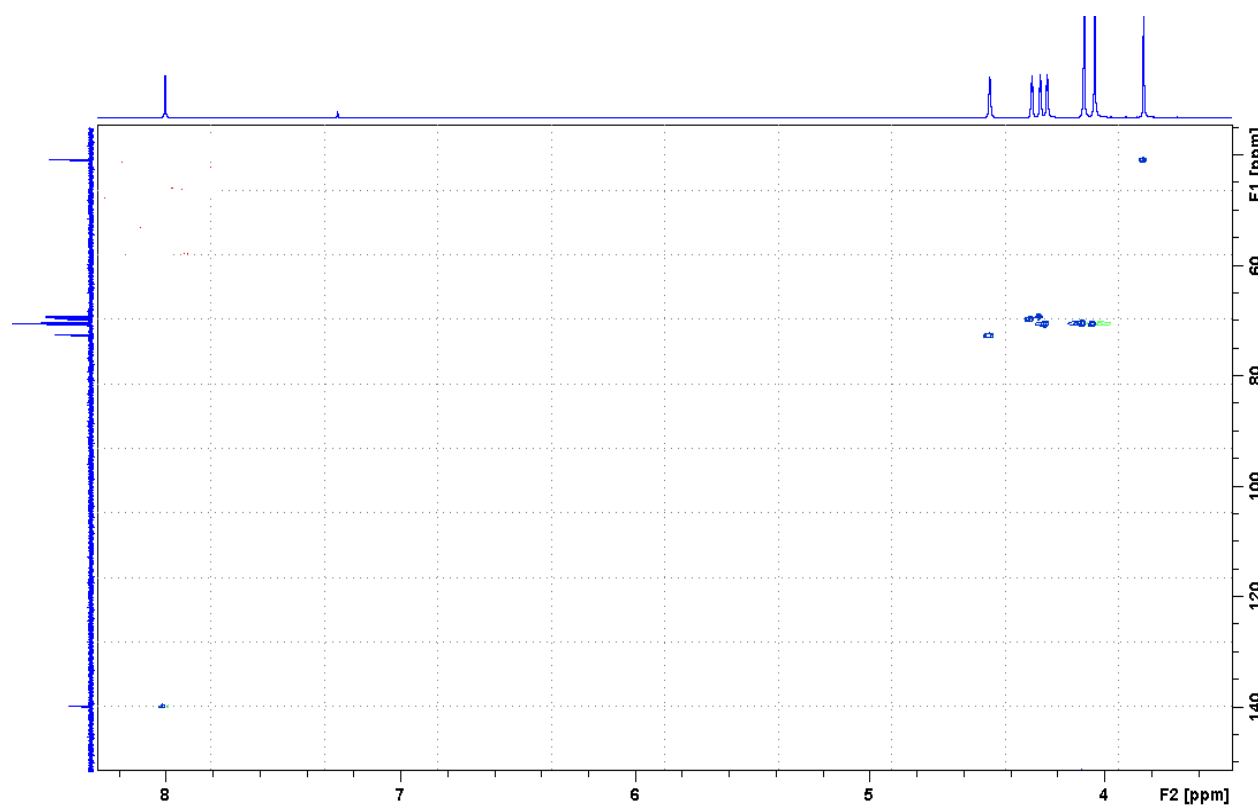

HMBC of 7

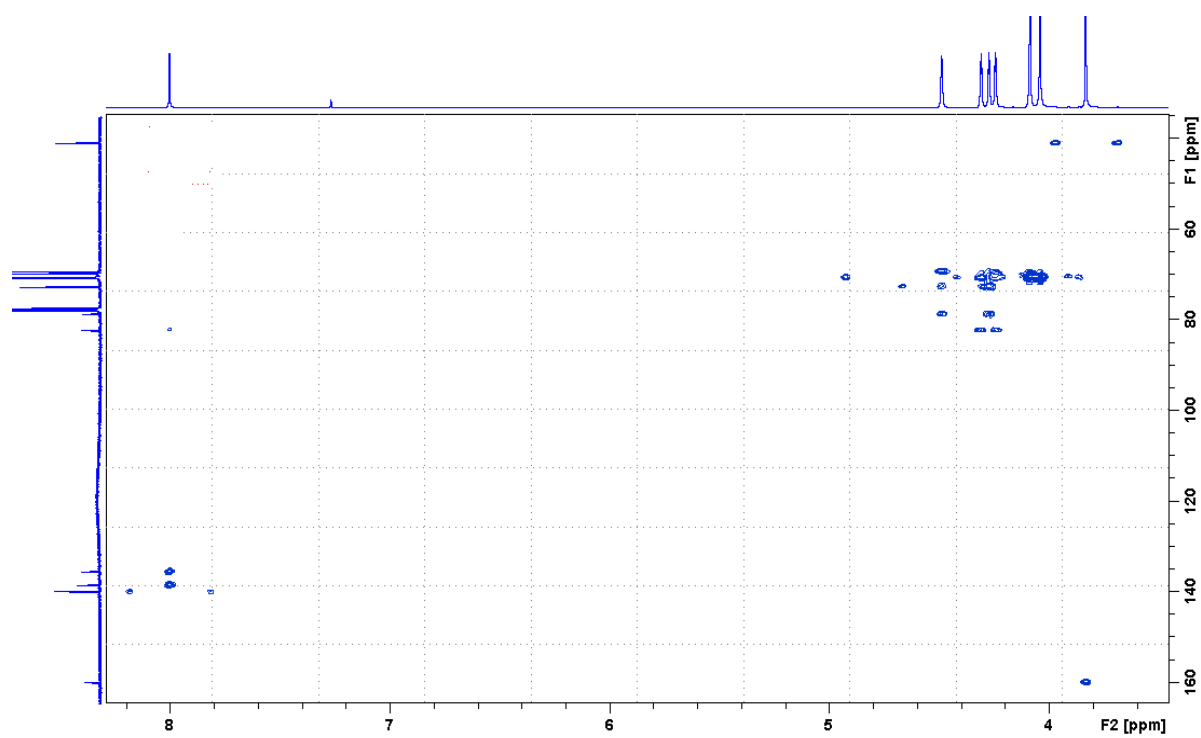

$^1\text{H}$  NMR of 8

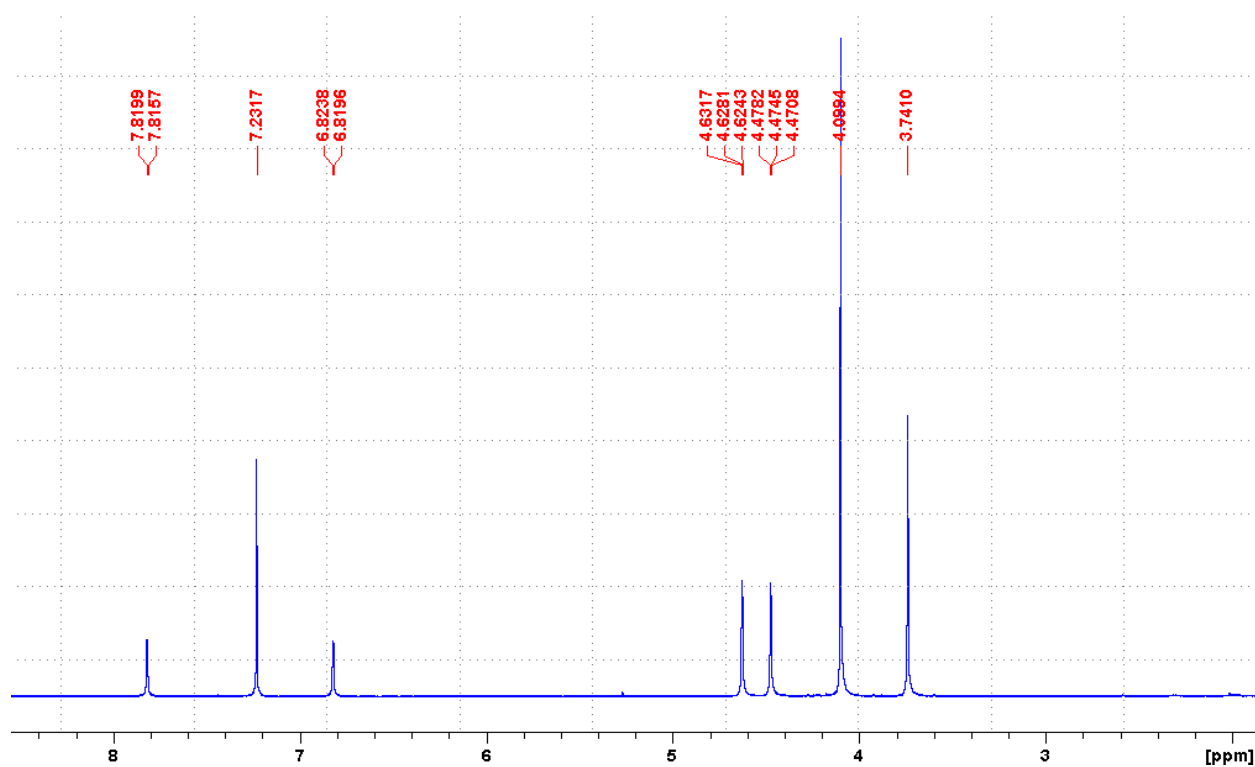

$^{13}\text{C}$  NMR of 8

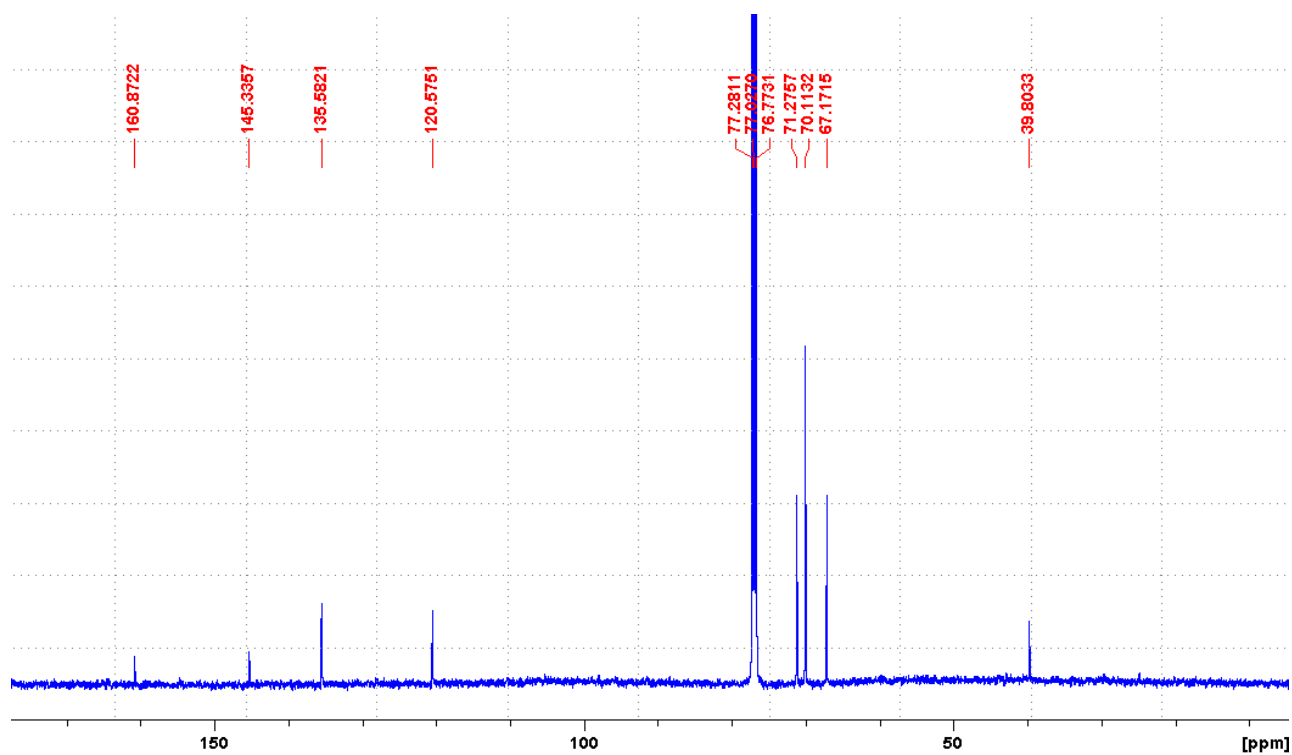

# HMBC of 8

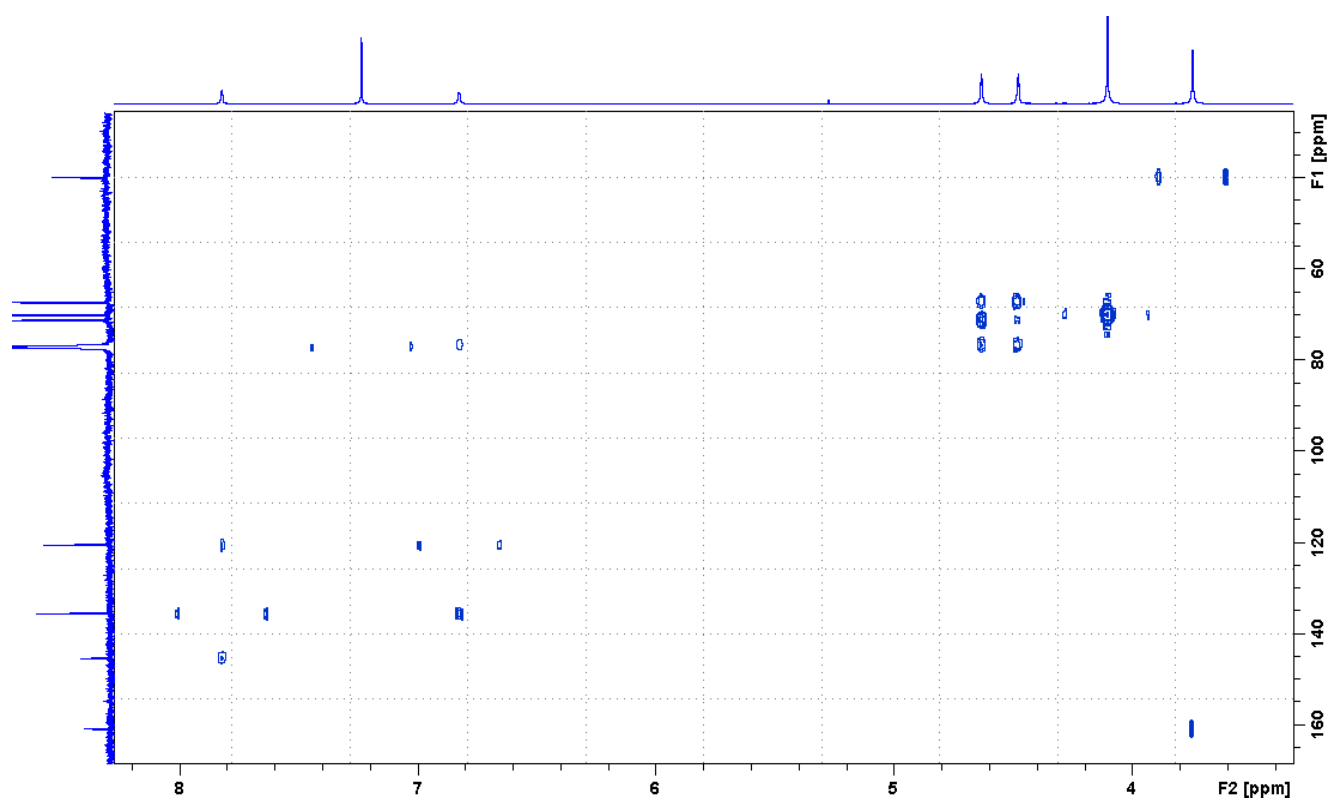

# NOESY of 8

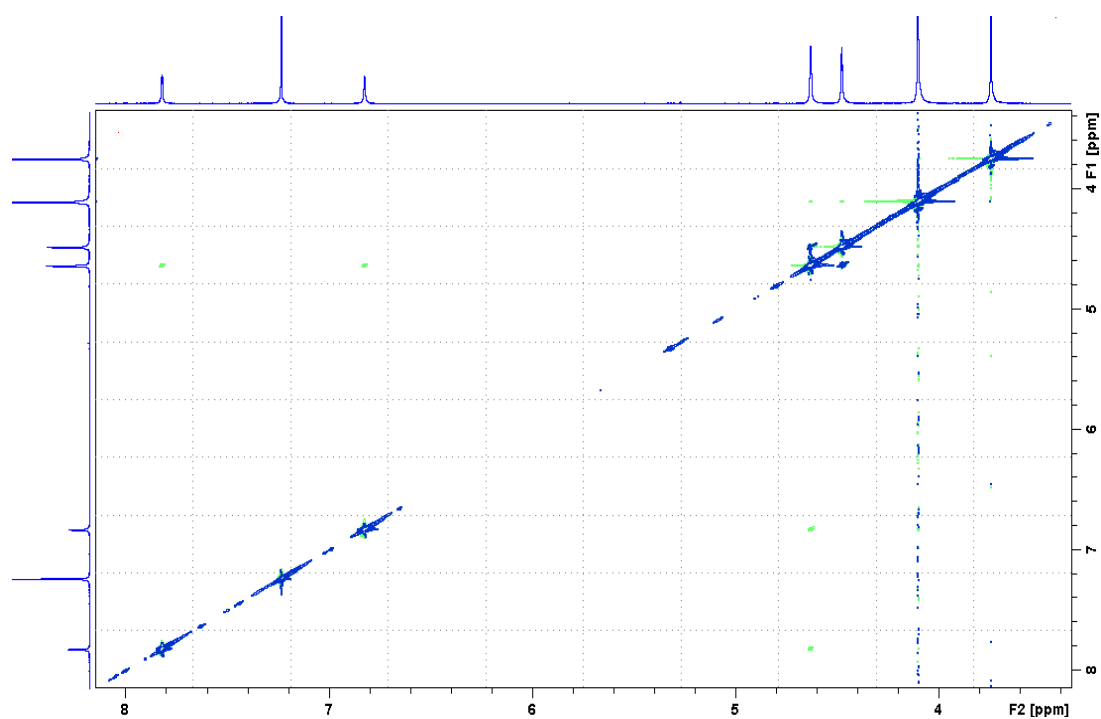

<sup>1</sup>H NMR 9

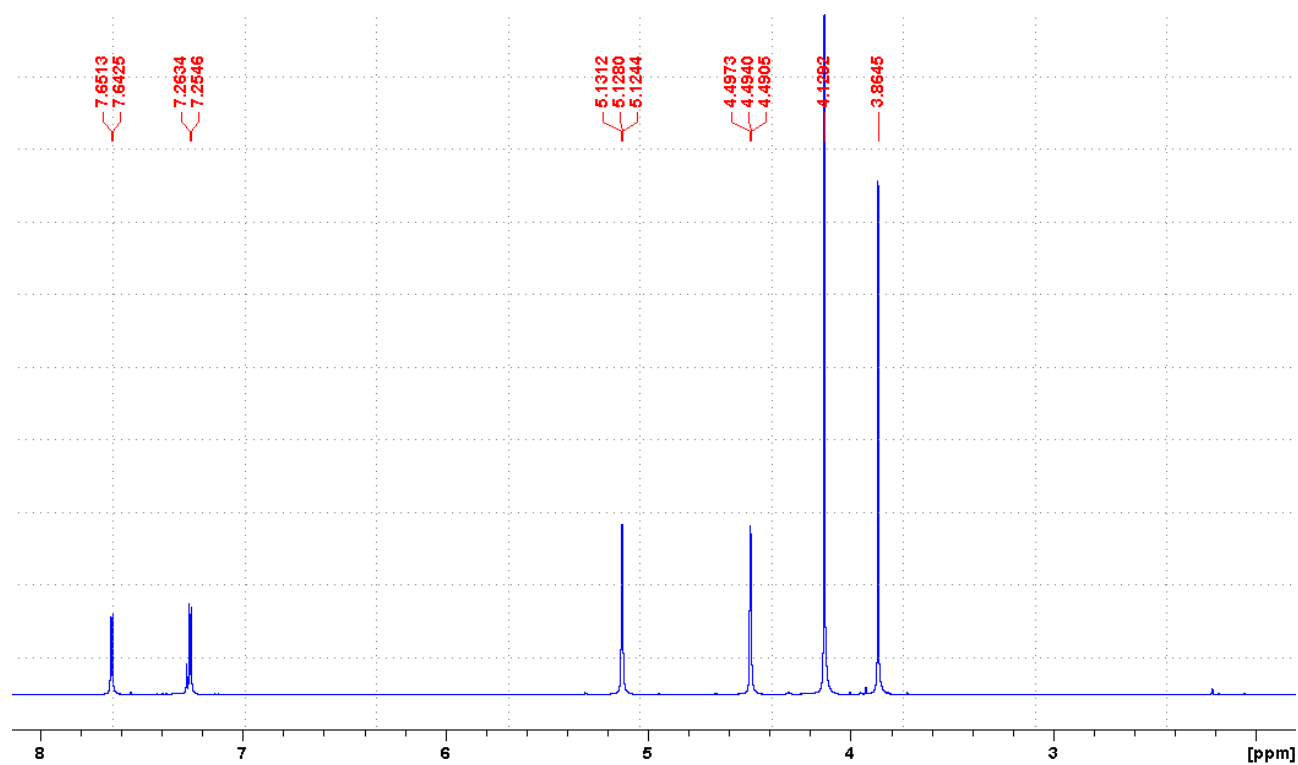

<sup>13</sup>C NMR of 9

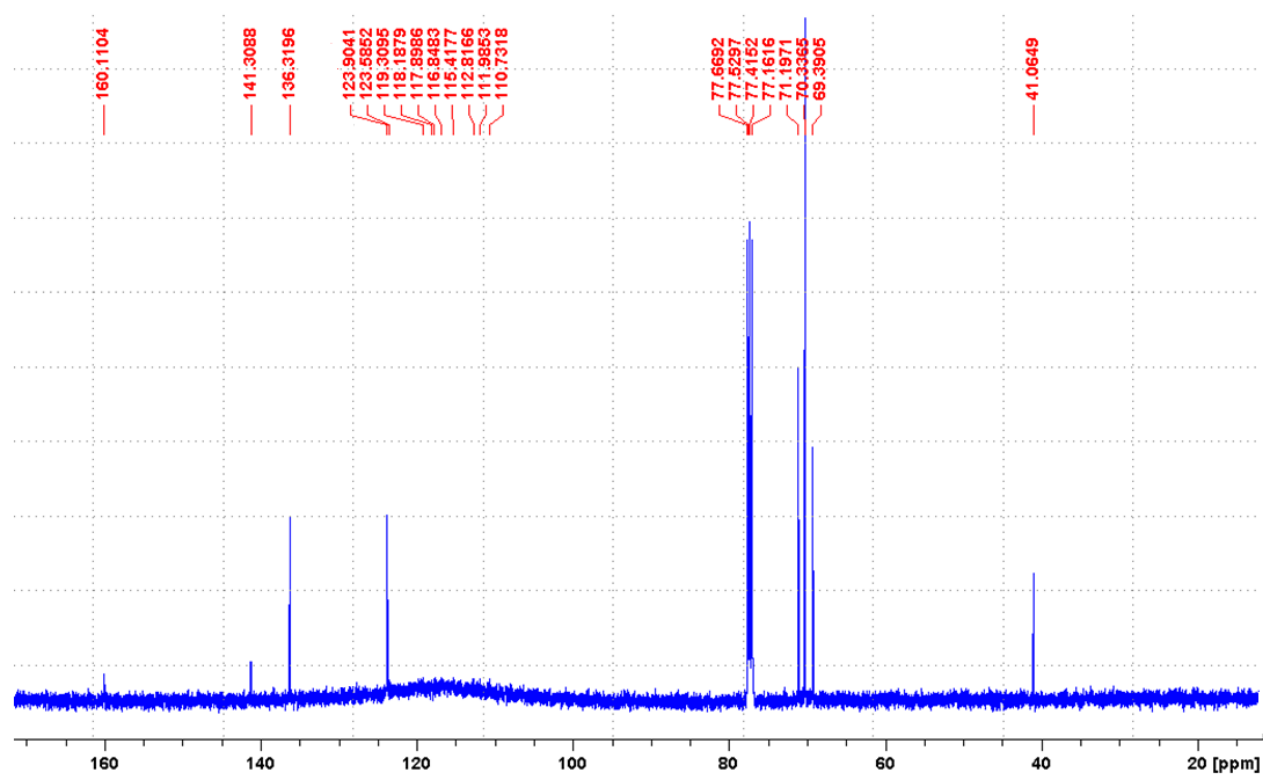



HMBC of 9

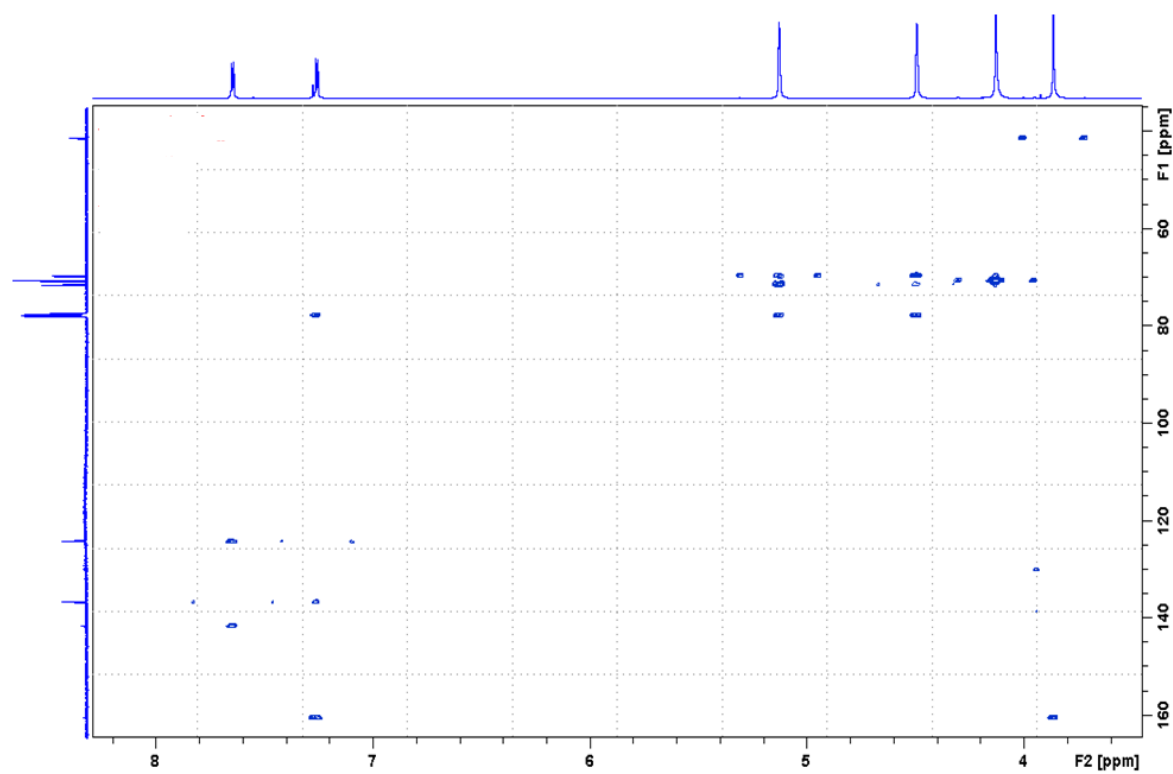

$^1\text{H}$  NMR of 11

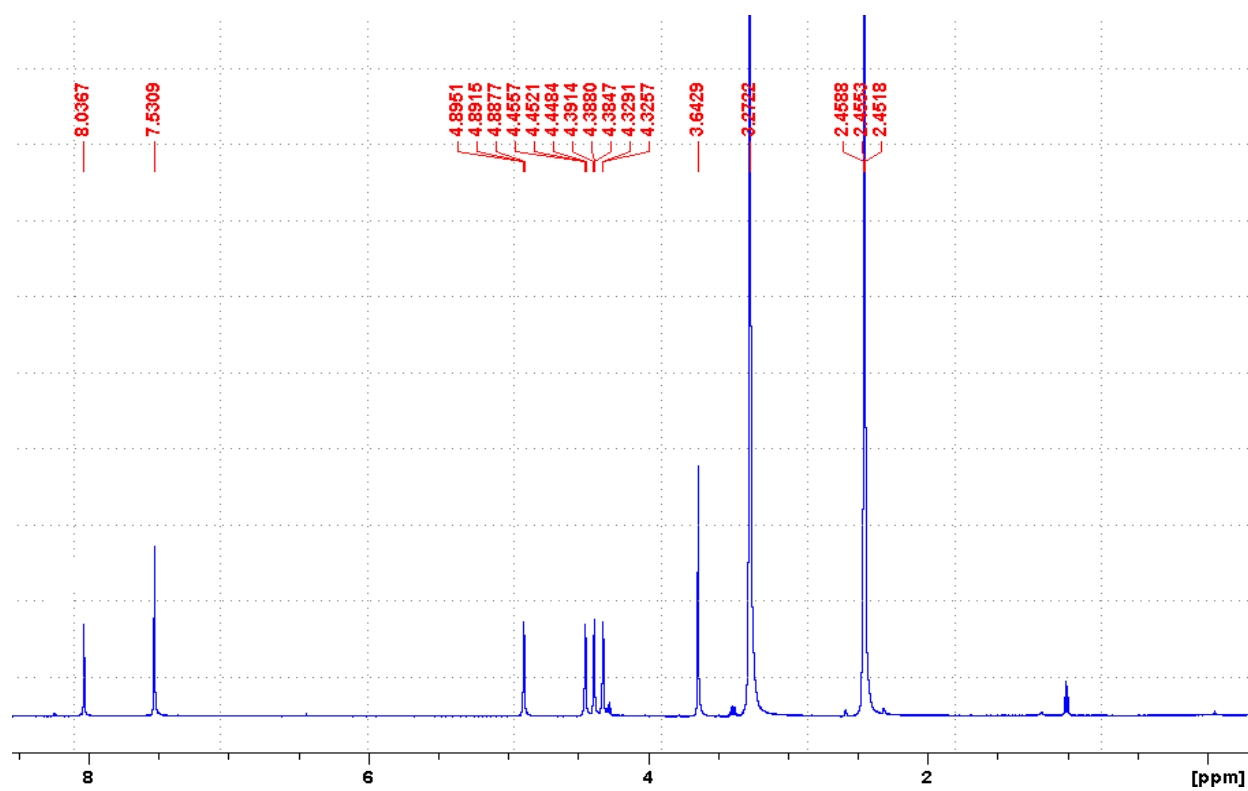

<sup>13</sup>C NMR of **11**

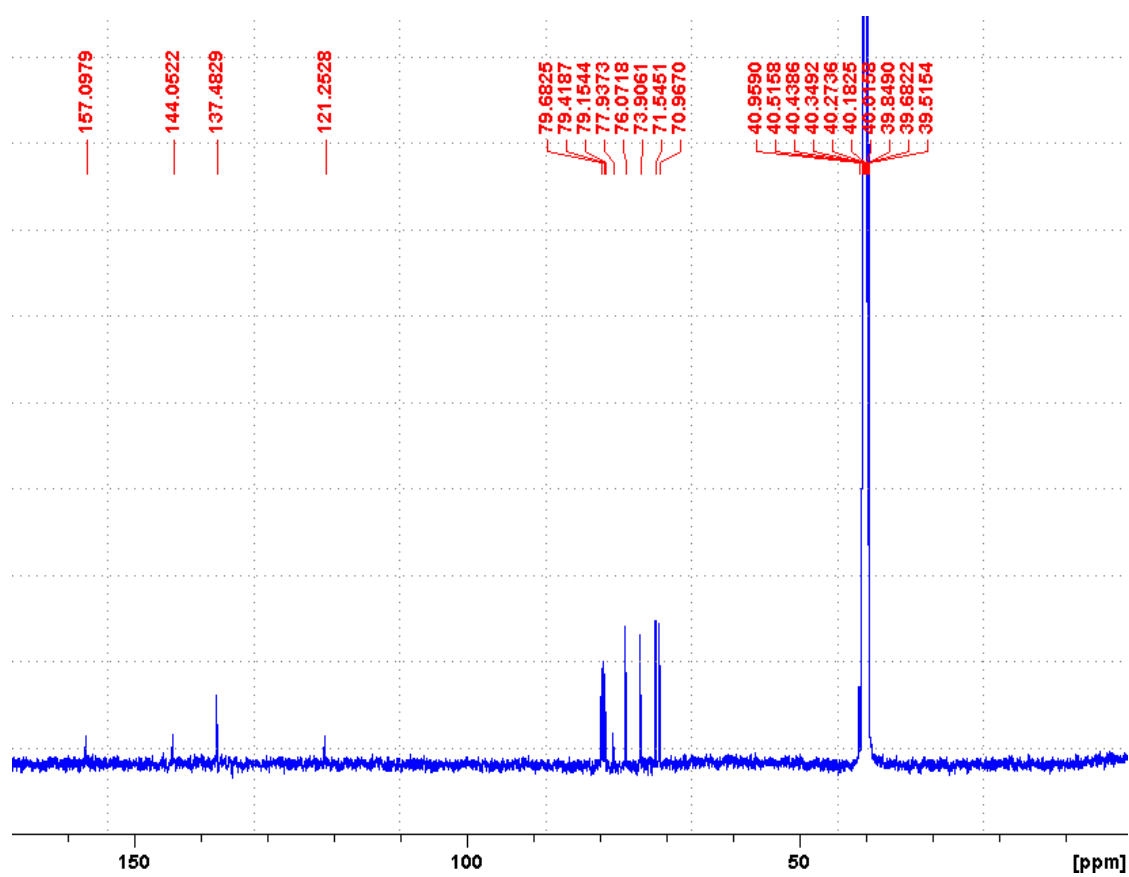

HQQC of **11**

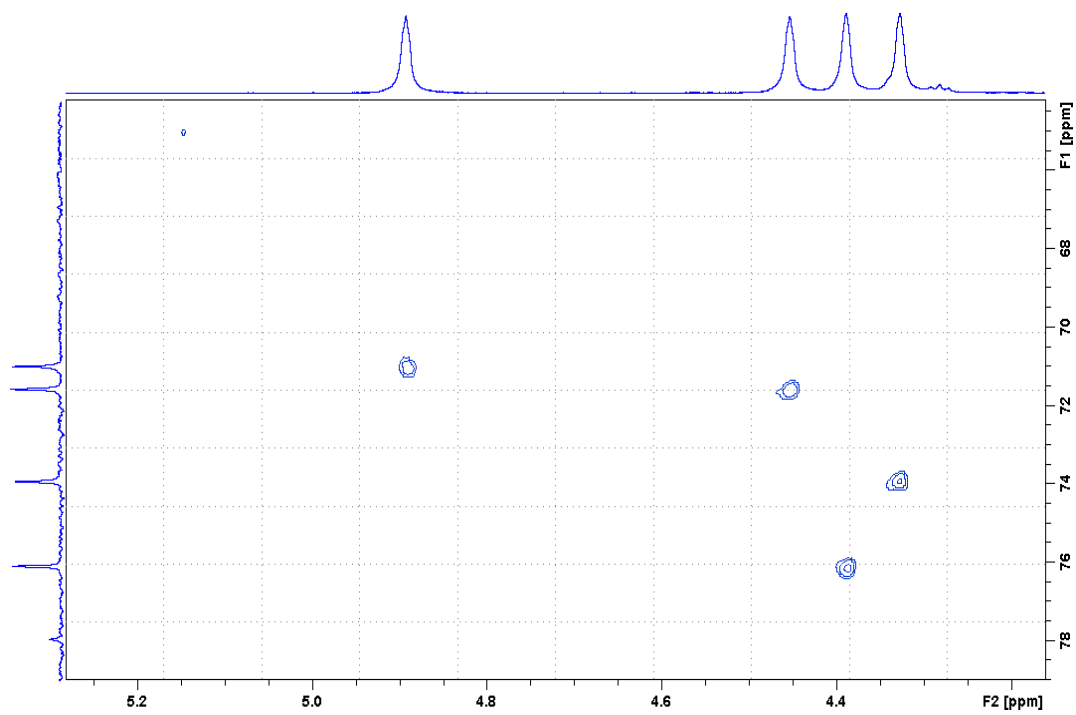

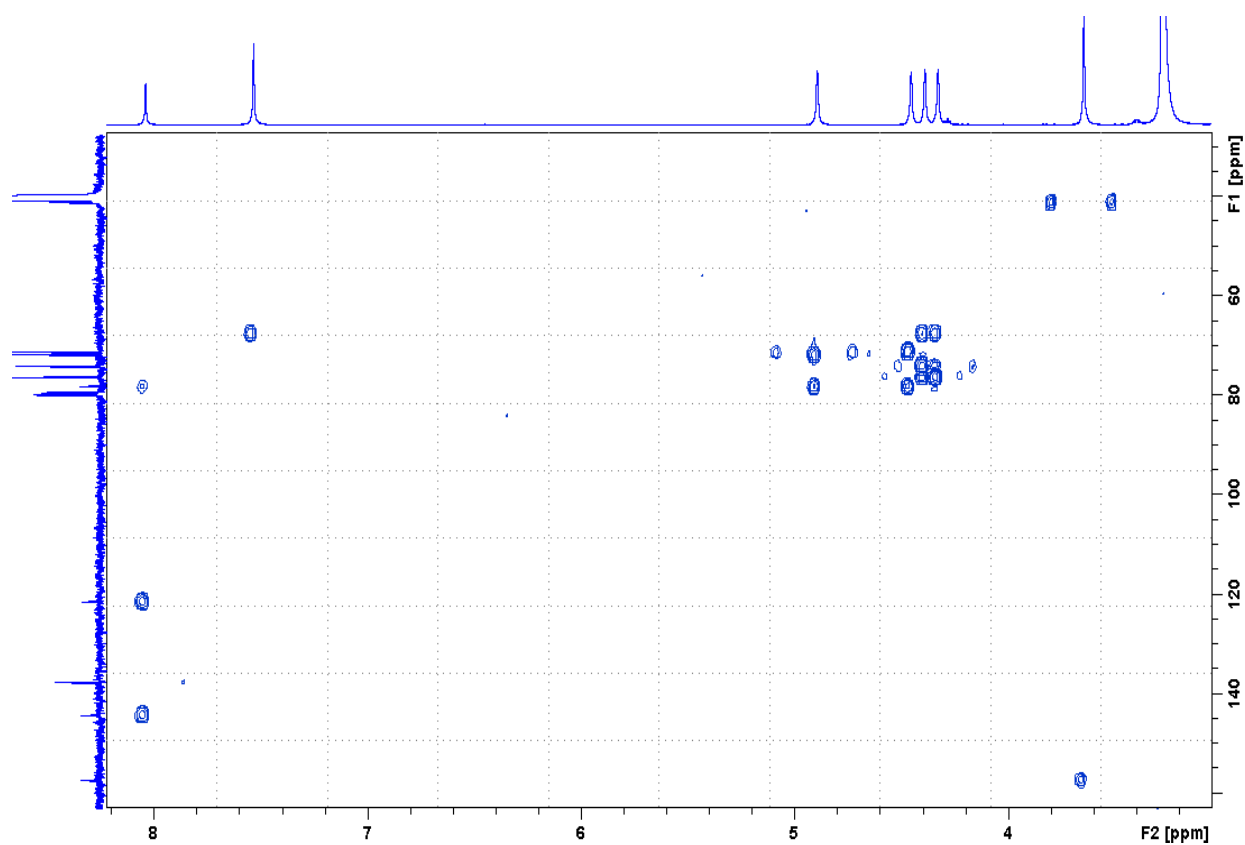

## NOESY of 11

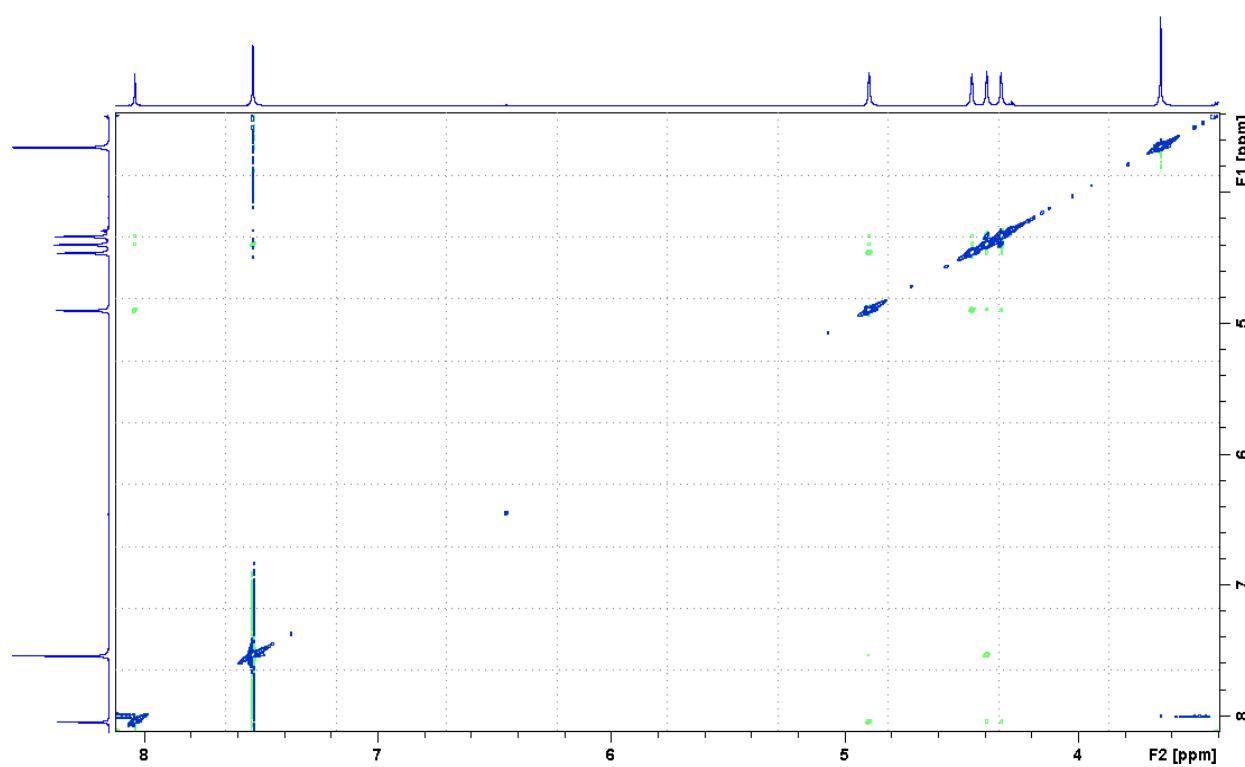

<sup>1</sup>H NMR of 12

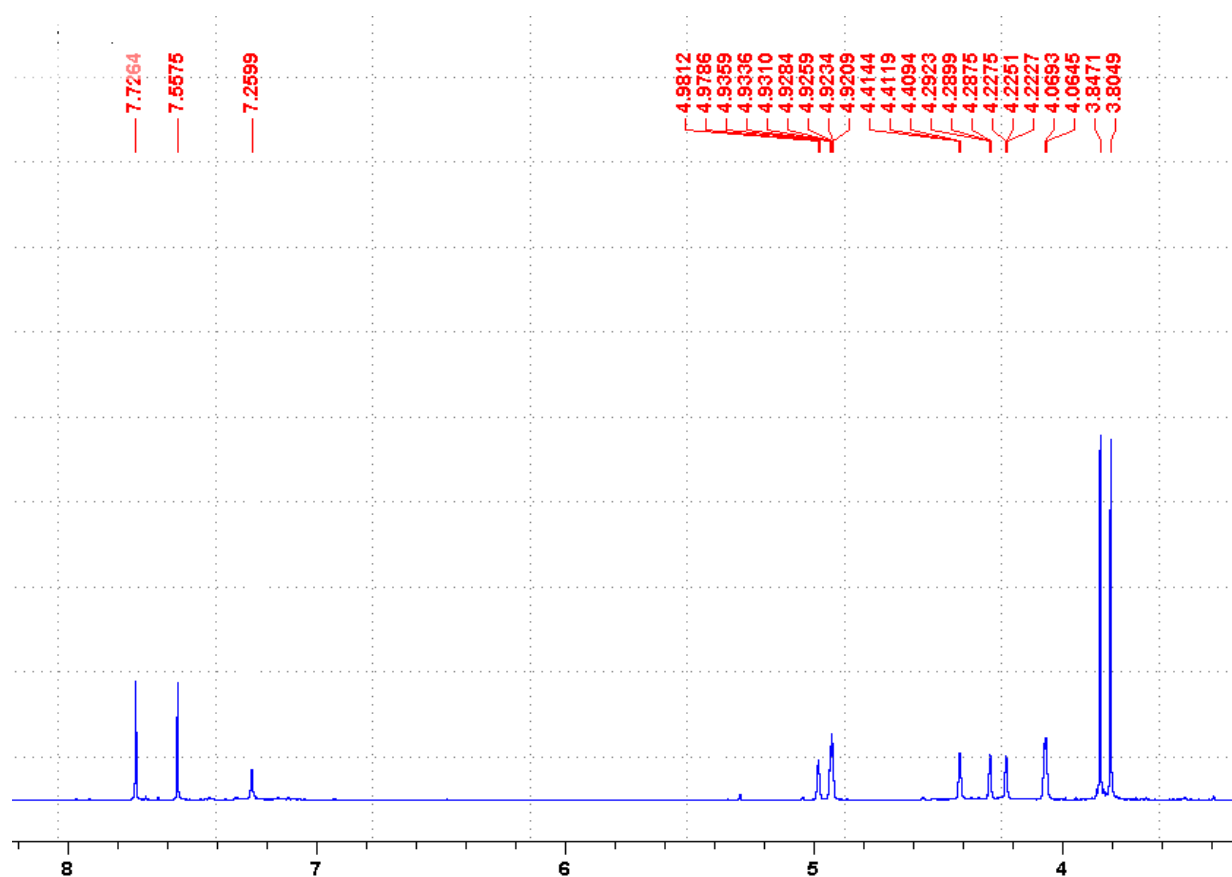

<sup>13</sup>C NMR of 12

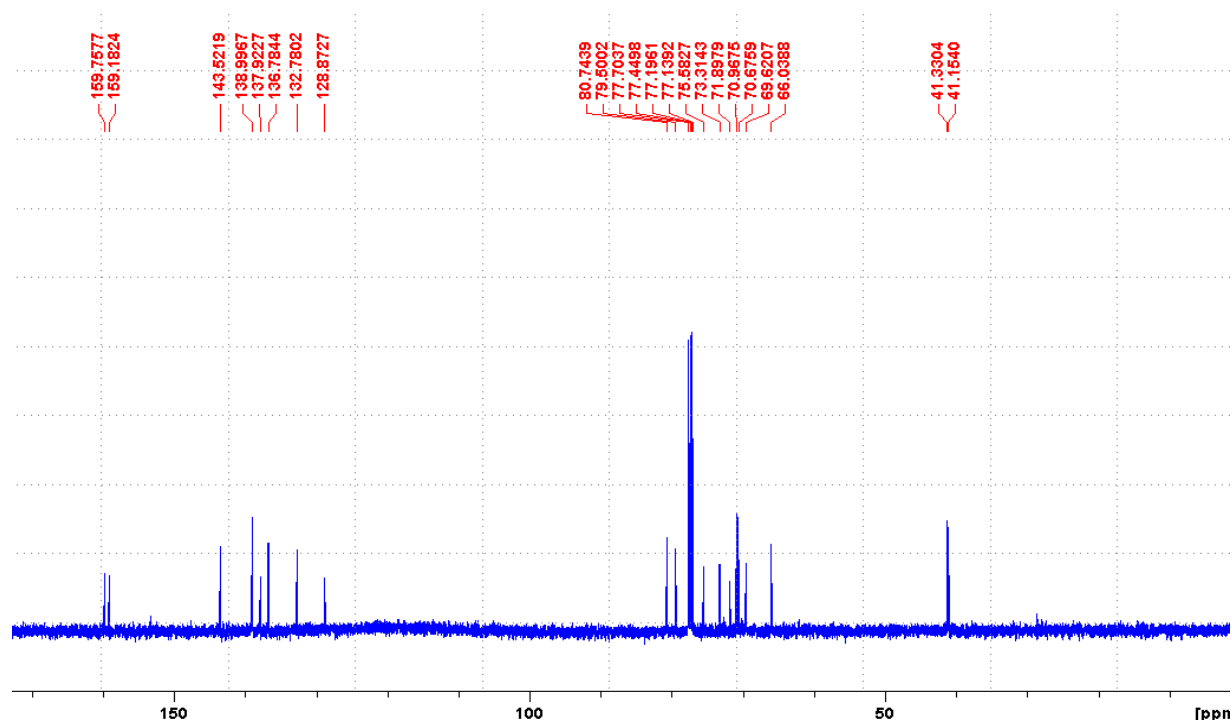

DEPT\_135 of 12

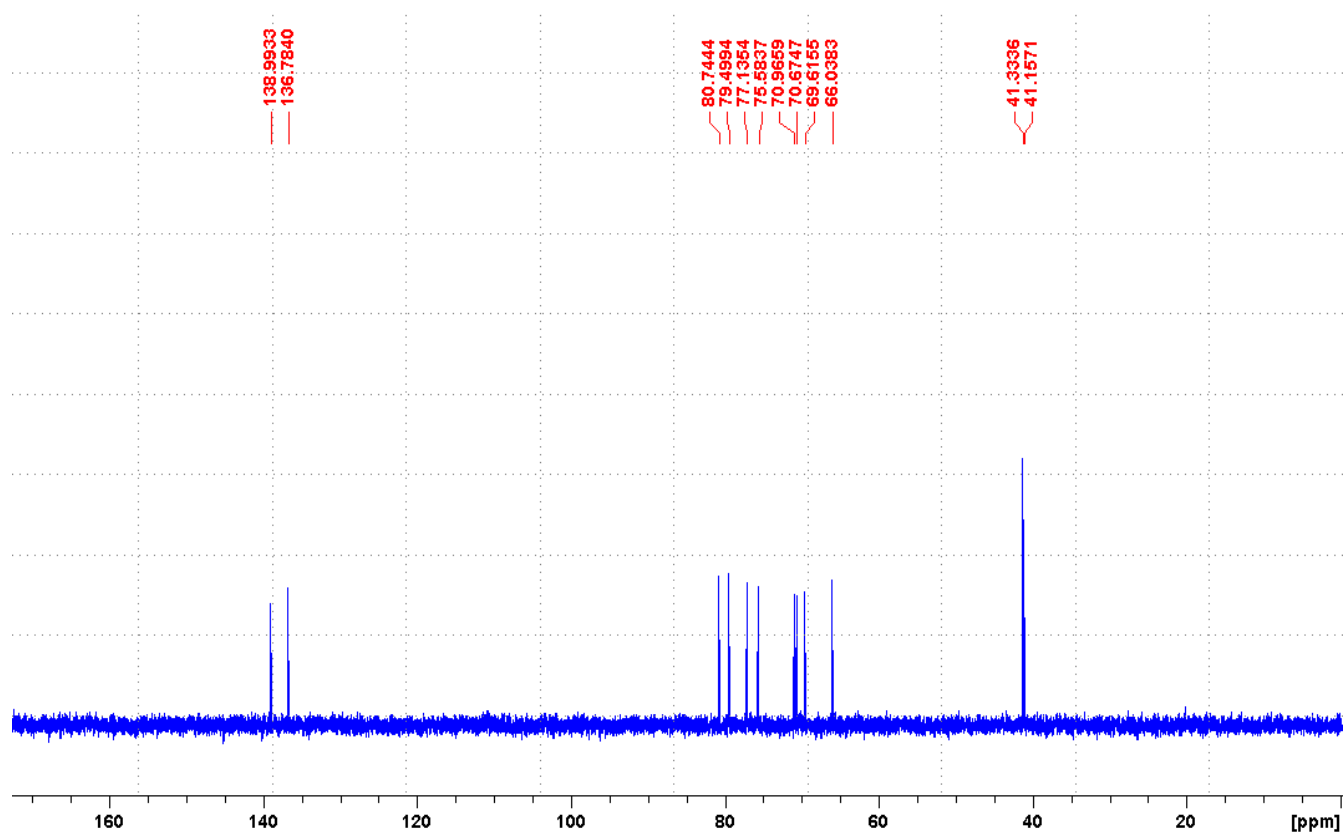

HSQC of 12

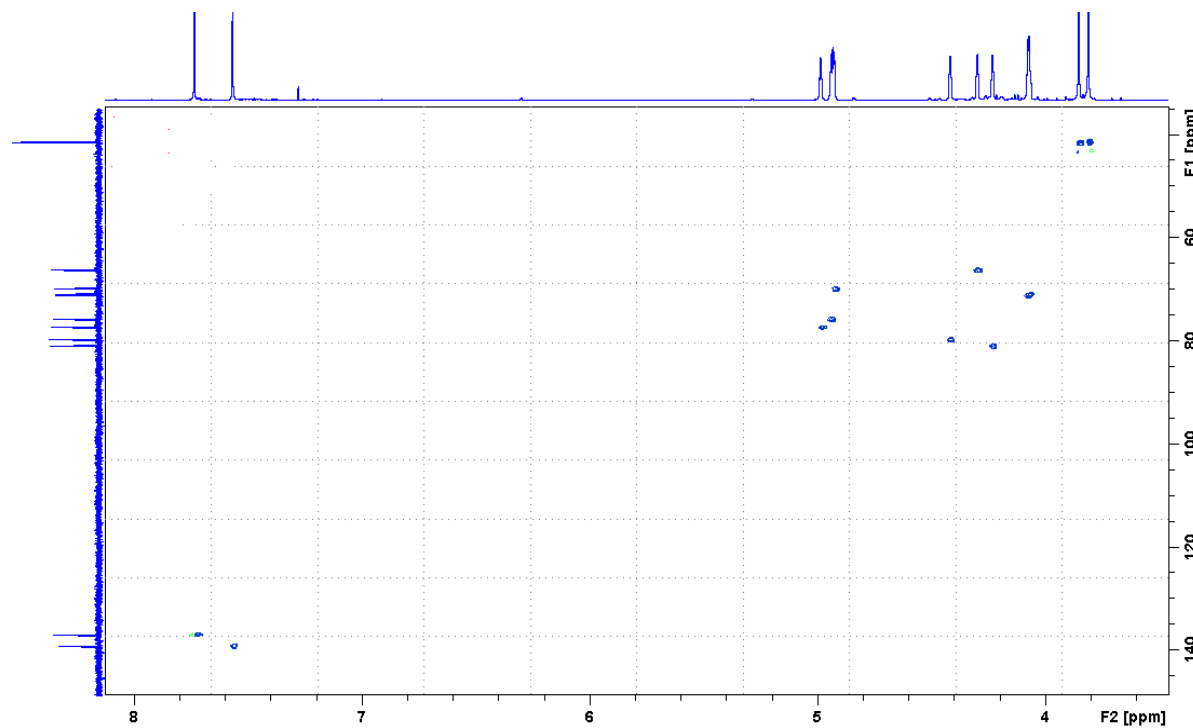

HMBC of 12

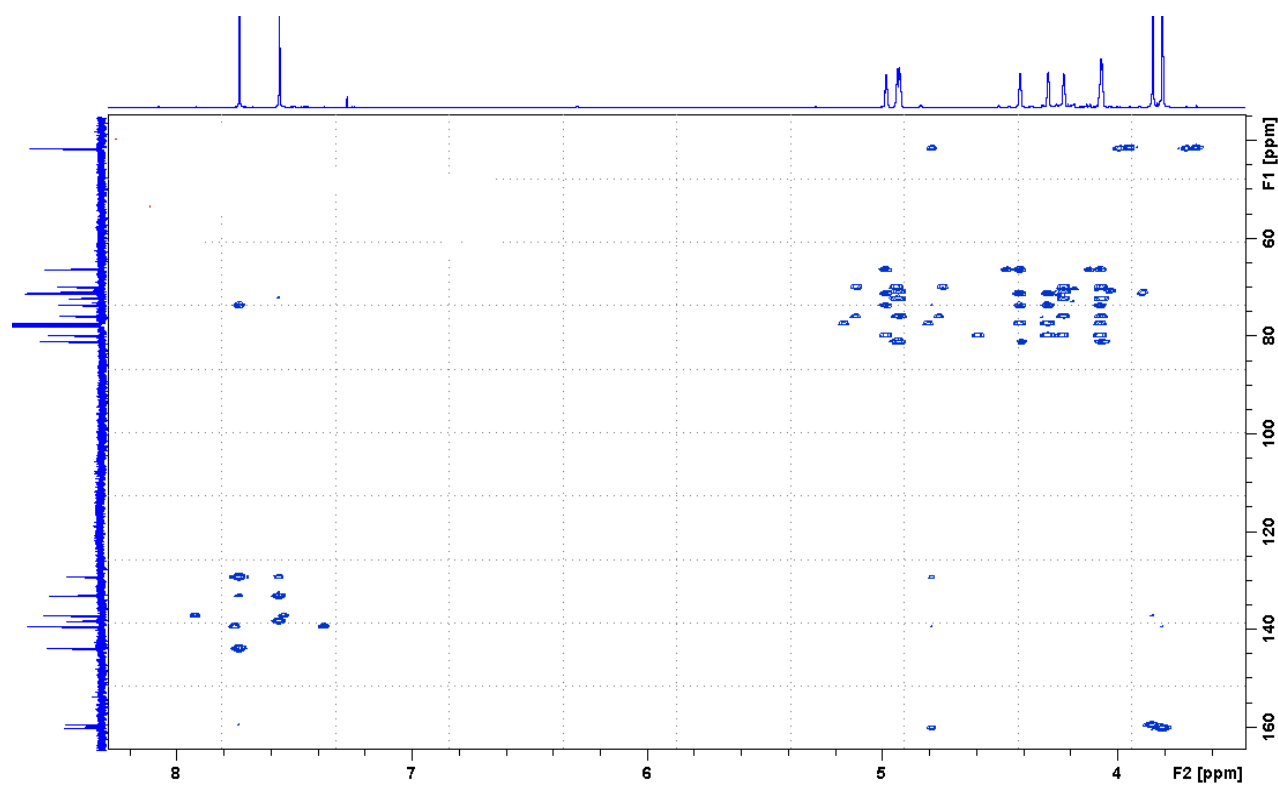

DNOE of 12

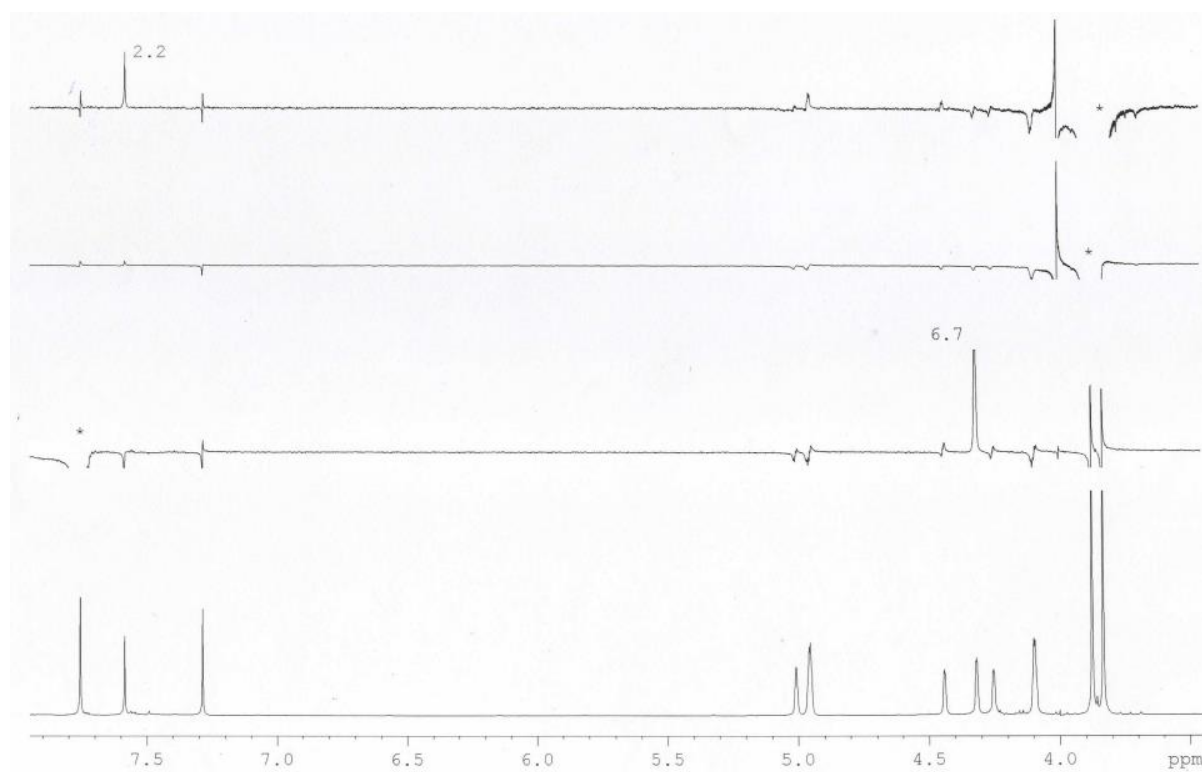

## S.2. Copies of the $^1\text{H}$ - and $^{13}\text{C}$ -NMR spectra of the deuterated products

### $^1\text{H}$ NMR of 8[D-5]

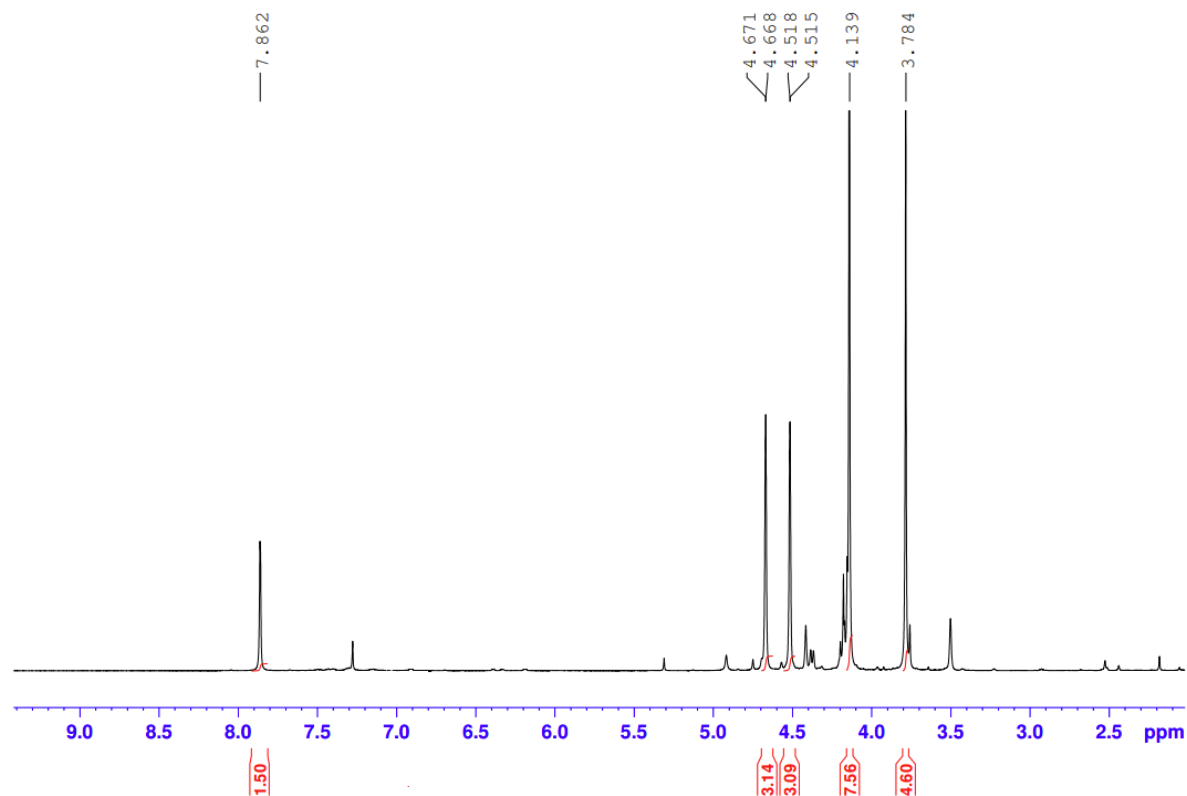

### $^{13}\text{C}$ NMR of 8[D-5]

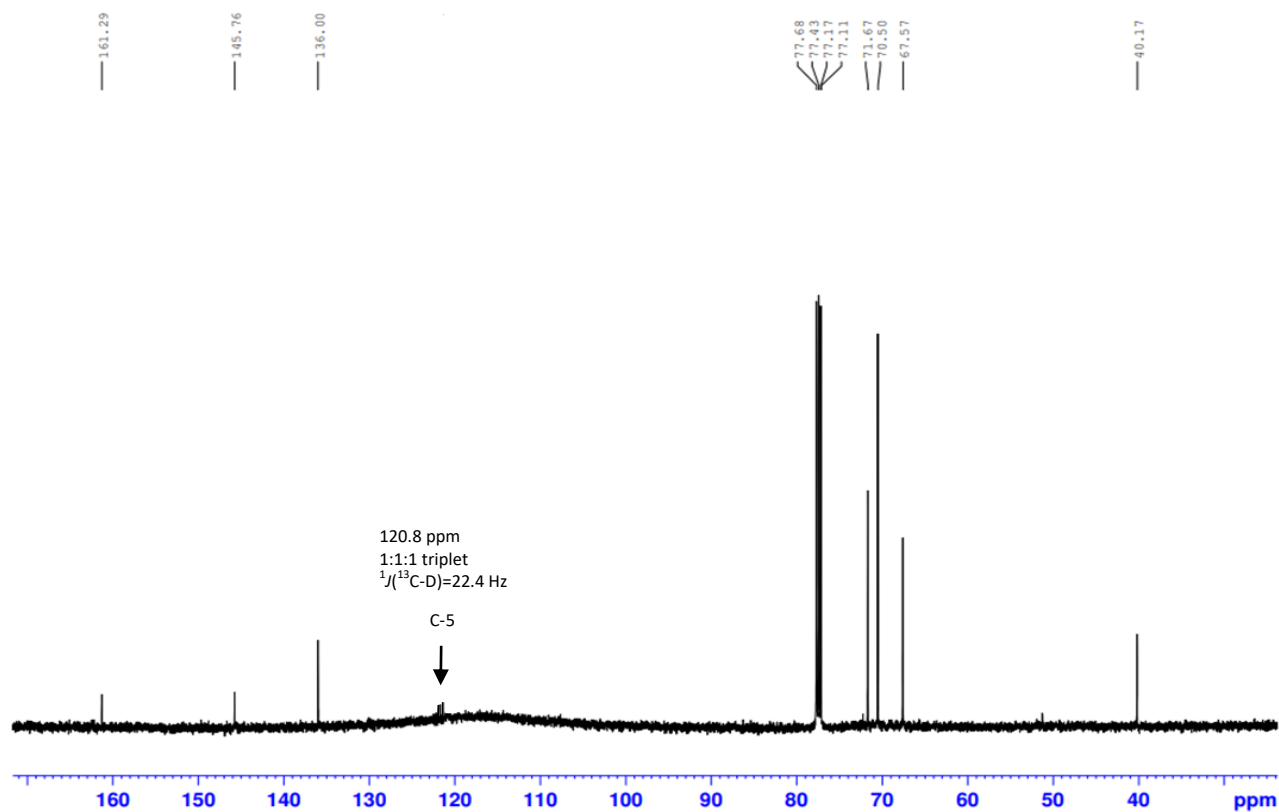

$^1\text{H}$  NMR of **9[D-4]**

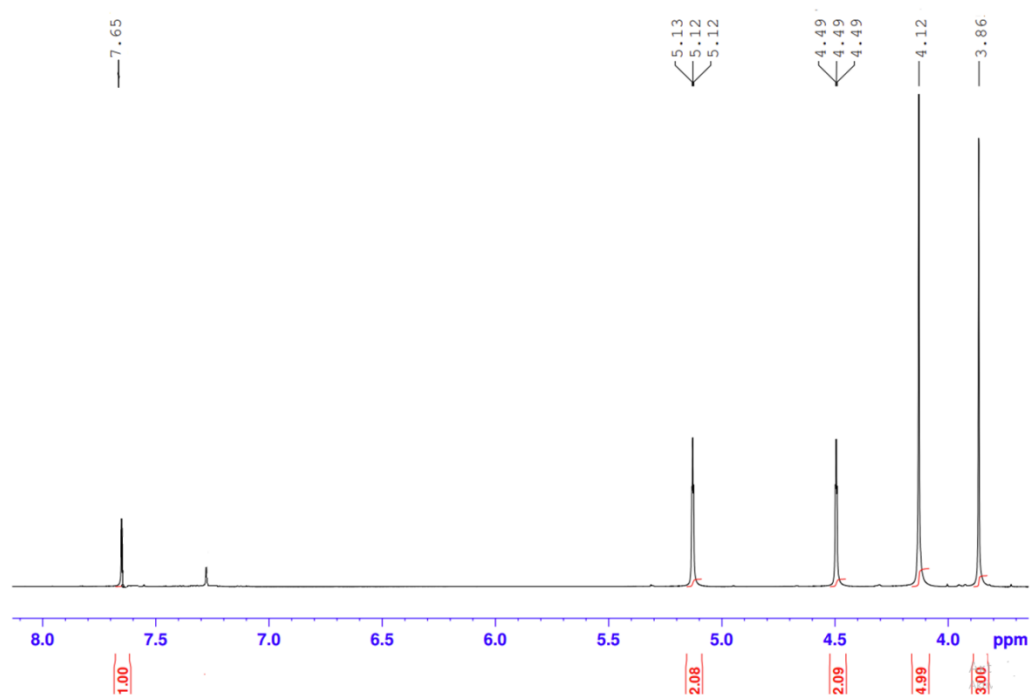

$^{13}\text{C}$  NMR of **9[D-4]**

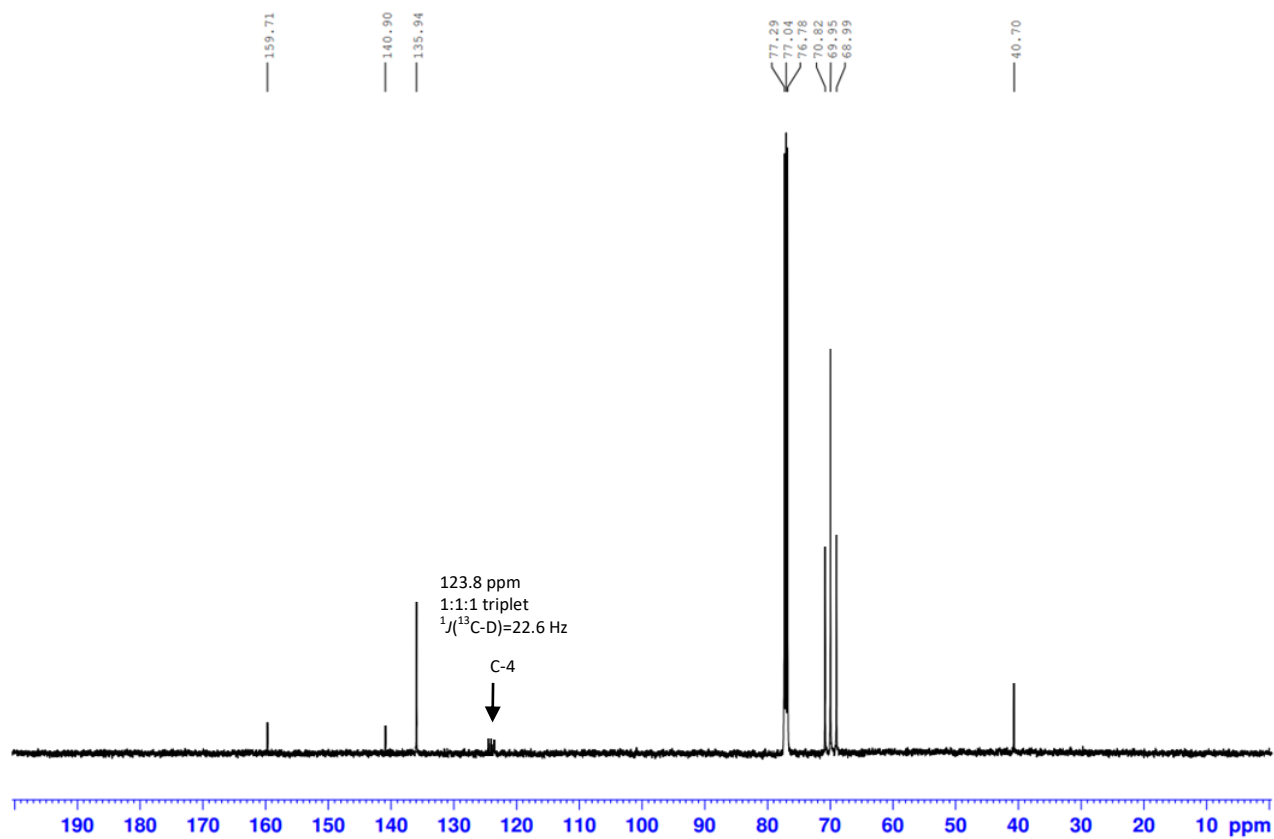



### S.3. Bonding orbitals contributing to Fe-Pd interaction in compounds 20a, 23a, 24a and 27a

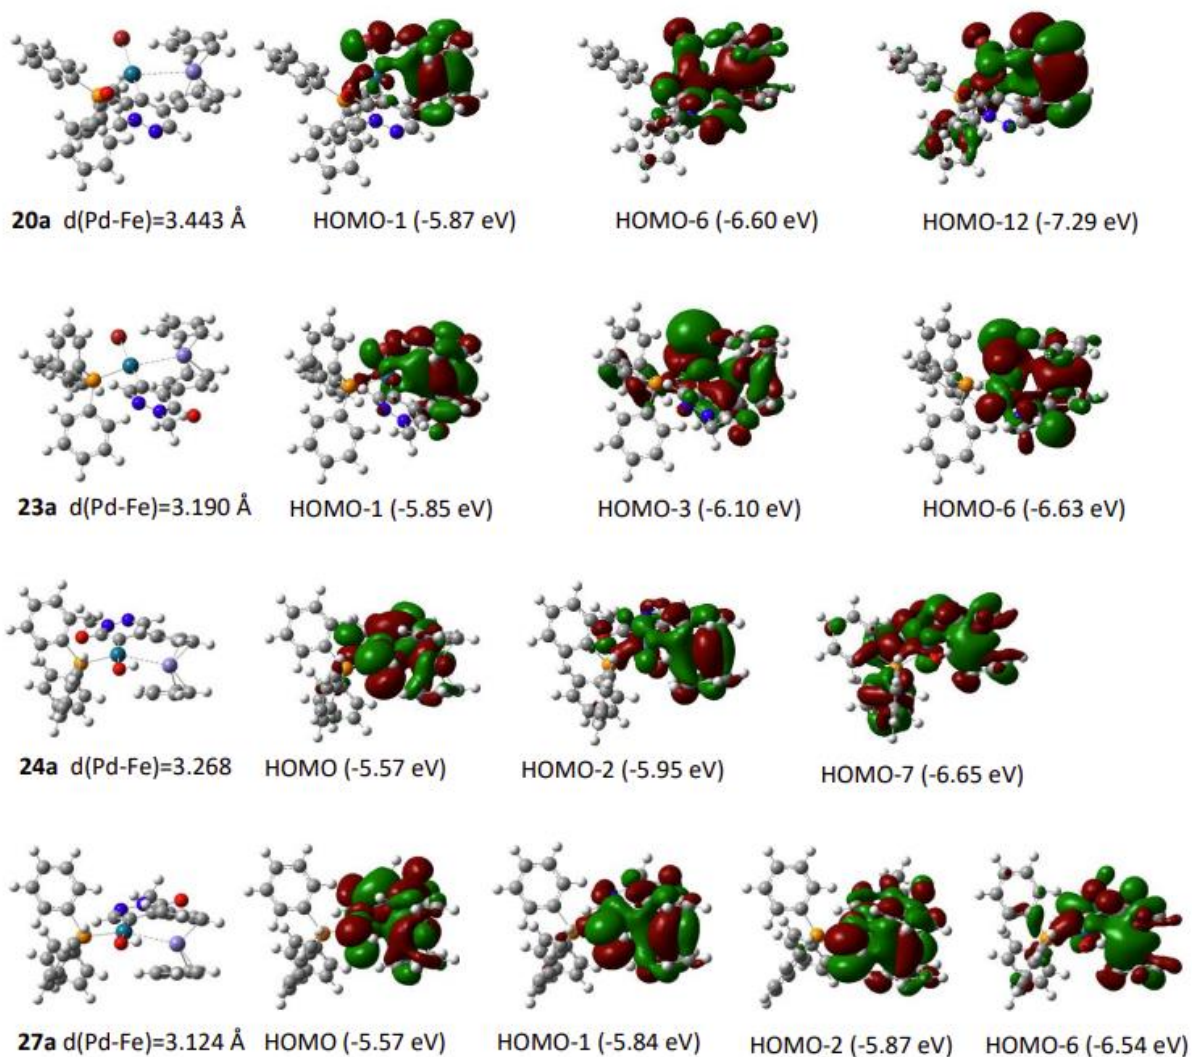

---

#### S.4. XYZ coordinates of the structures optimized by B3PW91/DGTZVP method

**1:**

| Row | Highlight |      | Display Tag |    | Symbol | X          | Y          | Z          |
|-----|-----------|------|-------------|----|--------|------------|------------|------------|
| 1   | No        | Show | 1           | H  |        | 3.1187150  | -0.0008910 | -1.3505290 |
| 2   | No        | Show | 2           | C  |        | 2.4438150  | -0.5610840 | -0.7149010 |
| 3   | No        | Show | 3           | C  |        | 2.4433390  | -0.5606360 | 0.7144820  |
| 4   | No        | Show | 4           | C  |        | 1.3625520  | -1.3840760 | -1.1574050 |
| 5   | No        | Show | 5           | C  |        | 1.3617600  | -1.3833380 | 1.1567810  |
| 6   | No        | Show | 6           | H  |        | 3.1178010  | 0.0001130  | 1.3500820  |
| 7   | No        | Show | 7           | C  |        | 0.6963290  | -1.8928320 | -0.0003810 |
| 8   | No        | Show | 8           | Fe |        | 0.6709120  | 0.1495450  | -0.0007840 |
| 9   | No        | Show | 9           | C  |        | -0.5969360 | 1.2489830  | 1.1544740  |
| 10  | No        | Show | 10          | C  |        | -1.2891130 | 0.7407740  | 0.0006250  |
| 11  | No        | Show | 11          | C  |        | 0.4918330  | 2.0569580  | 0.7160730  |
| 12  | No        | Show | 12          | H  |        | -0.8463900 | 1.0195590  | 2.1831620  |
| 13  | No        | Show | 13          | C  |        | -0.5980950 | 1.2515120  | -1.1528120 |
| 14  | No        | Show | 14          | C  |        | 0.4911230  | 2.0585190  | -0.7137470 |
| 15  | No        | Show | 15          | H  |        | 1.2194200  | 2.5474640  | 1.3516250  |
| 16  | No        | Show | 16          | H  |        | -0.8487900 | 1.0245920  | -2.1817590 |
| 17  | No        | Show | 17          | H  |        | 1.2178940  | 2.5505490  | -1.3490550 |
| 18  | No        | Show | 18          | H  |        | 1.0726360  | -1.5580010 | -2.1863420 |
| 19  | No        | Show | 19          | H  |        | 1.0710800  | -1.5565620 | 2.1856180  |
| 20  | No        | Show | 20          | B  |        | -2.4660610 | -0.2628760 | 0.0001020  |
| 21  | No        | Show | 21          | O  |        | -2.9682340 | -0.6811770 | -1.2157880 |
| 22  | No        | Show | 22          | H  |        | -3.7068700 | -1.3006810 | -1.1496570 |
| 23  | No        | Show | 23          | O  |        | -2.9663360 | -0.6844840 | 1.2156680  |
| 24  | No        | Show | 24          | H  |        | -3.7051470 | -1.3037260 | 1.1490230  |
| 25  | No        | Show | 25          | H  |        | -0.1868100 | -2.5196020 | -0.0004670 |

**2**

| Row | Highlight |      | Display Tag |    | Symbol | X          | Y          | Z          |
|-----|-----------|------|-------------|----|--------|------------|------------|------------|
| 1   | No        | Show | 1           | H  |        | -2.2034470 | -2.1067490 | -0.4367650 |
| 2   | No        | Show | 2           | C  |        | -1.5811730 | -1.3524340 | -0.9021750 |
| 3   | No        | Show | 3           | C  |        | -1.8091820 | 0.0645780  | -0.8150760 |
| 4   | No        | Show | 4           | C  |        | -0.3898330 | -1.5871090 | -1.6471680 |
| 5   | No        | Show | 5           | C  |        | -0.7241020 | 0.6898510  | -1.5263920 |
| 6   | No        | Show | 6           | C  |        | 0.1457290  | -0.3195070 | -2.0328520 |
| 7   | No        | Show | 7           | Fe |        | -0.0008080 | -0.4462380 | 0.0040710  |
| 8   | No        | Show | 8           | C  |        | 0.7253300  | 0.7183130  | 1.5135750  |
| 9   | No        | Show | 9           | C  |        | 1.8081290  | 0.0785660  | 0.8133880  |
| 10  | No        | Show | 10          | C  |        | -0.1390170 | -0.2830580 | 2.0407710  |
| 11  | No        | Show | 11          | H  |        | 0.5522370  | 1.7865600  | 1.5965910  |
| 12  | No        | Show | 12          | C  |        | 1.5791840  | -1.3370550 | 0.9262500  |
| 13  | No        | Show | 13          | C  |        | 0.3885000  | -1.5595460 | 1.6757620  |

---

|    |    |      |    |   |            |            |            |
|----|----|------|----|---|------------|------------|------------|
| 14 | No | Show | 14 | H | -1.0688600 | -0.1071490 | 2.5677630  |
| 15 | No | Show | 15 | H | 2.2001780  | -2.1001070 | 0.4734470  |
| 16 | No | Show | 16 | H | -0.0653480 | -2.5203570 | 1.8861230  |
| 17 | No | Show | 17 | H | 0.0656960  | -2.5505730 | -1.8414300 |
| 18 | No | Show | 18 | H | -0.5494070 | 1.7561070  | -1.6301210 |
| 19 | No | Show | 19 | H | 1.0782450  | -0.1556930 | -2.5588210 |
| 20 | No | Show | 20 | O | 3.7841750  | -0.0358200 | -0.7550360 |
| 21 | No | Show | 21 | H | 4.4648470  | 0.5121310  | -1.1730970 |
| 22 | No | Show | 22 | O | 3.2006030  | 2.1059180  | 0.0156190  |
| 23 | No | Show | 23 | H | 2.6080730  | 2.5753890  | 0.6165420  |
| 24 | No | Show | 24 | B | 2.9553930  | 0.7466030  | 0.0089050  |
| 25 | No | Show | 25 | B | -2.9539380 | 0.7486370  | -0.0204410 |
| 26 | No | Show | 26 | O | -3.1940630 | 2.1086180  | -0.0460810 |
| 27 | No | Show | 27 | H | -2.5964990 | 2.5684820  | -0.6494520 |
| 28 | No | Show | 28 | O | -3.7932450 | -0.0214720 | 0.7444160  |
| 29 | No | Show | 29 | H | -4.4731350 | 0.5343900  | 1.1532250  |

#### 4

| Row | Highlight |      | Display Tag |    | Symbol X   | Y          | Z          |
|-----|-----------|------|-------------|----|------------|------------|------------|
| 1   | No        | Show | 1           | N  | 1.7671770  | -2.0338700 | 0.0000130  |
| 2   | No        | Show | 2           | C  | 0.4633280  | -2.0498160 | 0.0000110  |
| 3   | No        | Show | 3           | C  | -0.3255620 | -0.8612800 | 0.0000040  |
| 4   | No        | Show | 4           | C  | 0.3023510  | 0.3508880  | 0.0000030  |
| 5   | No        | Show | 5           | C  | 1.7669950  | 0.4099260  | 0.0000130  |
| 6   | No        | Show | 6           | N  | 2.3811620  | -0.8501790 | 0.0000110  |
| 7   | No        | Show | 7           | H  | -0.0034360 | -3.0291550 | 0.0000130  |
| 8   | No        | Show | 8           | O  | 2.4421910  | 1.4311400  | -0.0000040 |
| 9   | No        | Show | 9           | Br | -0.5826640 | 1.9984600  | -0.0000090 |
| 10  | No        | Show | 10          | Br | -2.2016760 | -1.0681910 | -0.0000020 |
| 11  | No        | Show | 11          | C  | 3.8413620  | -0.8749790 | 0.0000080  |
| 12  | No        | Show | 12          | H  | 4.2207270  | -0.3601540 | -0.8850490 |
| 13  | No        | Show | 13          | H  | 4.2207310  | -0.3601580 | 0.8850650  |
| 14  | No        | Show | 14          | H  | 4.1471420  | -1.9191280 | 0.0000050  |

#### 5

| Row | Highlight |      | Display Tag |   | Symbol X   | Y          | Z          |
|-----|-----------|------|-------------|---|------------|------------|------------|
| 1   | No        | Show | 1           | B | 1.7322090  | -0.0000020 | -0.0000170 |
| 2   | No        | Show | 2           | O | 2.3855650  | -1.2142340 | 0.0005150  |
| 3   | No        | Show | 3           | H | 3.3497780  | -1.1507260 | 0.0007910  |
| 4   | No        | Show | 4           | O | 2.3855540  | 1.2142360  | -0.0005380 |
| 5   | No        | Show | 5           | H | 3.3497680  | 1.1507370  | -0.0004060 |
| 6   | No        | Show | 6           | C | 0.1713990  | -0.0000070 | -0.0000290 |
| 7   | No        | Show | 7           | C | -0.5509600 | 1.2056530  | 0.0002540  |
| 8   | No        | Show | 8           | C | -0.5509630 | -1.2056530 | -0.0002880 |
| 9   | No        | Show | 9           | C | -1.9454800 | 1.2087190  | 0.0002580  |

---

|    |    |      |    |   |            |            |            |
|----|----|------|----|---|------------|------------|------------|
| 10 | No | Show | 10 | H | -0.0096680 | 2.1484510  | 0.0004660  |
| 11 | No | Show | 11 | C | -1.9454930 | -1.2087150 | -0.0002420 |
| 12 | No | Show | 12 | H | -0.0096880 | -2.1484620 | -0.0005210 |
| 13 | No | Show | 13 | C | -2.6451040 | 0.0000000  | 0.0000230  |
| 14 | No | Show | 14 | H | -2.4889390 | 2.1507000  | 0.0004660  |
| 15 | No | Show | 15 | H | -2.4889420 | -2.1507010 | -0.0004340 |
| 16 | No | Show | 16 | H | -3.7327030 | 0.0000130  | 0.0000450  |

## 10

| Row | Highlight |      | Display Tag |   | Symbol X   | Y          | Z          |
|-----|-----------|------|-------------|---|------------|------------|------------|
| 1   | No        | Show | 1           | B | 1.7322090  | -0.0000020 | -0.0000170 |
| 2   | No        | Show | 2           | O | 2.3855650  | -1.2142340 | 0.0005150  |
| 3   | No        | Show | 3           | H | 3.3497780  | -1.1507260 | 0.0007910  |
| 4   | No        | Show | 4           | O | 2.3855540  | 1.2142360  | -0.0005380 |
| 5   | No        | Show | 5           | H | 3.3497680  | 1.1507370  | -0.0004060 |
| 6   | No        | Show | 6           | C | 0.1713990  | -0.0000070 | -0.0000290 |
| 7   | No        | Show | 7           | C | -0.5509600 | 1.2056530  | 0.0002540  |
| 8   | No        | Show | 8           | C | -0.5509630 | -1.2056530 | -0.0002880 |
| 9   | No        | Show | 9           | C | -1.9454800 | 1.2087190  | 0.0002580  |
| 10  | No        | Show | 10          | H | -0.0096680 | 2.1484510  | 0.0004660  |
| 11  | No        | Show | 11          | C | -1.9454930 | -1.2087150 | -0.0002420 |
| 12  | No        | Show | 12          | H | -0.0096880 | -2.1484620 | -0.0005210 |
| 13  | No        | Show | 13          | C | -2.6451040 | 0.0000000  | 0.0000230  |
| 14  | No        | Show | 14          | H | -2.4889390 | 2.1507000  | 0.0004660  |
| 15  | No        | Show | 15          | H | -2.4889420 | -2.1507010 | -0.0004340 |
| 16  | No        | Show | 16          | H | -3.7327030 | 0.0000130  | 0.0000450  |

## 12

| Row | Highlight |      | Display Tag |    | Symbol X   | Y          | Z          |
|-----|-----------|------|-------------|----|------------|------------|------------|
| 1   | No        | Show | 1           | C  | 0.1185630  | -1.7017550 | -1.1128840 |
| 2   | No        | Show | 2           | C  | -0.3331910 | -3.0208350 | -0.7372510 |
| 3   | No        | Show | 3           | C  | -0.9612680 | -1.0728980 | -1.8239900 |
| 4   | No        | Show | 4           | C  | -1.6750580 | -3.1790680 | -1.1877730 |
| 5   | No        | Show | 5           | H  | 0.2242440  | -3.7372260 | -0.1458580 |
| 6   | No        | Show | 6           | C  | -2.0579150 | -1.9812710 | -1.8629450 |
| 7   | No        | Show | 7           | Fe | -1.4827010 | -1.5512380 | 0.0678450  |
| 8   | No        | Show | 8           | C  | -2.9369980 | -1.4030310 | 1.5250100  |
| 9   | No        | Show | 9           | C  | -2.7214190 | -0.1494180 | 0.8884930  |
| 10  | No        | Show | 10          | C  | -1.6995940 | -1.8314220 | 2.0931610  |
| 11  | No        | Show | 11          | H  | -3.8733160 | -1.9464230 | 1.5519430  |
| 12  | No        | Show | 12          | C  | -1.3319000 | 0.2007830  | 1.0337190  |
| 13  | No        | Show | 13          | H  | -3.4567700 | 0.4334770  | 0.3530660  |
| 14  | No        | Show | 14          | C  | -0.7122680 | -0.8482490 | 1.7983510  |

---

|    |    |      |    |   |            |            |            |
|----|----|------|----|---|------------|------------|------------|
| 15 | No | Show | 15 | H | -1.5269970 | -2.7589240 | 2.6252260  |
| 16 | No | Show | 16 | H | 0.3356730  | -0.9063580 | 2.0630340  |
| 17 | No | Show | 17 | H | -2.3022120 | -4.0458100 | -1.0204670 |
| 18 | No | Show | 18 | H | -3.0286230 | -1.7767240 | -2.2972570 |
| 19 | No | Show | 19 | C | 1.3908240  | -1.1133380 | -0.6562000 |
| 20 | No | Show | 20 | C | 2.5186090  | -1.9957240 | -0.6313920 |
| 21 | No | Show | 21 | C | 1.5791740  | 0.1759600  | -0.1932290 |
| 22 | No | Show | 22 | N | 3.7031170  | -1.6857930 | -0.1808400 |
| 23 | No | Show | 23 | H | 2.4278960  | -3.0042240 | -1.0229420 |
| 24 | No | Show | 24 | C | 2.8884980  | 0.5428800  | 0.3492010  |
| 25 | No | Show | 25 | N | 3.8689790  | -0.4535980 | 0.2955700  |
| 26 | No | Show | 26 | C | -0.6655390 | 1.3282550  | 0.3587060  |
| 27 | No | Show | 27 | C | 0.5971660  | 1.3024540  | -0.2004220 |
| 28 | No | Show | 28 | C | -1.4575310 | 2.5605540  | 0.2394640  |
| 29 | No | Show | 29 | N | 0.3715730  | 3.5824530  | -0.9989910 |
| 30 | No | Show | 30 | O | 3.1682010  | 1.6343580  | 0.8512340  |
| 31 | No | Show | 31 | N | -0.8431210 | 3.6087180  | -0.4375970 |
| 32 | No | Show | 32 | C | 1.0575740  | 2.4832680  | -0.8701270 |
| 33 | No | Show | 33 | H | 2.0401380  | 2.5050370  | -1.3282170 |
| 34 | No | Show | 34 | O | -2.5985790 | 2.7161530  | 0.6848820  |
| 35 | No | Show | 35 | H | -0.9599140 | -0.0633890 | -2.2145530 |
| 36 | No | Show | 36 | C | -1.5887320 | 4.8541880  | -0.5697820 |
| 37 | No | Show | 37 | H | -2.5136160 | 4.6821120  | -1.1254120 |
| 38 | No | Show | 38 | H | -1.8526680 | 5.2359420  | 0.4187510  |
| 39 | No | Show | 39 | H | -0.9487520 | 5.5588710  | -1.0970810 |
| 40 | No | Show | 40 | C | 5.1893740  | -0.1289100 | 0.8234580  |
| 41 | No | Show | 41 | H | 5.5887140  | 0.7482840  | 0.3104490  |
| 42 | No | Show | 42 | H | 5.1199580  | 0.1029260  | 1.8886760  |
| 43 | No | Show | 43 | H | 5.8254440  | -0.9964860 | 0.6593440  |

### 13

| Row | Highlight | Display | Tag | Symbol | X          | Y          | Z          |
|-----|-----------|---------|-----|--------|------------|------------|------------|
| 1   | No        | Show    | 8   | C      | 3.0619820  | -0.2446290 | 0.0414870  |
| 2   | No        | Show    | 16  | C      | 4.3746400  | 0.3592890  | 0.0476640  |
| 3   | No        | Show    | 3   | C      | 1.8825460  | 0.4228380  | 0.0248100  |
| 4   | No        | Show    | 32  | N      | 4.2775750  | 1.7596820  | 0.0369020  |
| 5   | No        | Show    | 9   | C      | 2.0012340  | 1.8473110  | 0.0104720  |
| 6   | No        | Show    | 18  | N      | 3.1501840  | 2.4784900  | 0.0190660  |
| 7   | No        | Show    | 1   | Pd     | 0.4360400  | -1.0302720 | -0.0096960 |
| 8   | No        | Show    | 2   | P      | -1.3425840 | 0.4233640  | 0.0050970  |
| 9   | No        | Show    | 33  | O      | 5.4615290  | -0.2120680 | 0.0627410  |
| 10  | No        | Show    | 19  | H      | 1.1352990  | 2.5007670  | -0.0101140 |

---

|    |    |      |    |    |            |            |            |
|----|----|------|----|----|------------|------------|------------|
| 11 | No | Show | 5  | C  | -1.1438150 | 1.6682050  | -1.3241700 |
| 12 | No | Show | 12 | C  | -0.6532270 | 1.2243290  | -2.5615300 |
| 13 | No | Show | 13 | C  | -1.4694060 | 3.0204090  | -1.1594100 |
| 14 | No | Show | 24 | C  | -0.5076270 | 2.1172770  | -3.6212240 |
| 15 | No | Show | 25 | H  | -0.3817640 | 0.1792810  | -2.6938460 |
| 16 | No | Show | 26 | C  | -1.3100510 | 3.9135930  | -2.2201680 |
| 17 | No | Show | 27 | H  | -1.8334330 | 3.3868920  | -0.2037620 |
| 18 | No | Show | 37 | C  | -0.8334090 | 3.4643880  | -3.4516810 |
| 19 | No | Show | 38 | H  | -0.1286330 | 1.7613040  | -4.5755070 |
| 20 | No | Show | 39 | H  | -1.5561290 | 4.9628440  | -2.0794480 |
| 21 | No | Show | 45 | H  | -0.7081870 | 4.1629010  | -4.2748490 |
| 22 | No | Show | 6  | C  | -1.5043890 | 1.3274010  | 1.5905470  |
| 23 | No | Show | 14 | C  | -2.6892380 | 2.0180370  | 1.8945430  |
| 24 | No | Show | 15 | C  | -0.4581180 | 1.3225230  | 2.5206200  |
| 25 | No | Show | 28 | C  | -2.8075670 | 2.7142670  | 3.0954770  |
| 26 | No | Show | 29 | H  | -3.5269100 | 1.9972150  | 1.2022080  |
| 27 | No | Show | 30 | C  | -0.5817370 | 2.0180620  | 3.7237890  |
| 28 | No | Show | 31 | H  | 0.4481930  | 0.7610580  | 2.3109880  |
| 29 | No | Show | 40 | C  | -1.7526660 | 2.7186170  | 4.0107680  |
| 30 | No | Show | 41 | H  | -3.7290840 | 3.2450190  | 3.3202490  |
| 31 | No | Show | 42 | H  | 0.2359930  | 2.0023540  | 4.4392650  |
| 32 | No | Show | 46 | H  | -1.8497840 | 3.2565420  | 4.9502360  |
| 33 | No | Show | 4  | C  | -3.0206730 | -0.2546980 | -0.2521940 |
| 34 | No | Show | 11 | C  | -3.7811660 | 0.0632970  | -1.3823760 |
| 35 | No | Show | 10 | C  | -3.5527540 | -1.1102760 | 0.7240100  |
| 36 | No | Show | 22 | C  | -5.0666350 | -0.4615930 | -1.5301520 |
| 37 | No | Show | 23 | H  | -3.3827060 | 0.7228300  | -2.1473340 |
| 38 | No | Show | 20 | C  | -4.8376770 | -1.6223510 | 0.5754940  |
| 39 | No | Show | 21 | H  | -2.9618250 | -1.3848690 | 1.5927010  |
| 40 | No | Show | 34 | C  | -5.5969730 | -1.3012980 | -0.5525230 |
| 41 | No | Show | 36 | H  | -5.6504460 | -0.2099070 | -2.4117450 |
| 42 | No | Show | 35 | H  | -5.2401620 | -2.2871490 | 1.3349180  |
| 43 | No | Show | 44 | H  | -6.5972640 | -1.7102110 | -0.6698960 |
| 44 | No | Show | 7  | Br | -0.8986940 | -3.1222290 | -0.1117460 |
| 45 | No | Show | 17 | Br | 2.9253500  | -2.1572790 | 0.0477730  |
| 46 | No | Show | 43 | C  | 5.5278430  | 2.5120460  | 0.0444400  |
| 47 | No | Show | 48 | H  | 6.1048530  | 2.2670180  | 0.9388910  |
| 48 | No | Show | 47 | H  | 6.1258770  | 2.2488120  | -0.8307410 |
| 49 | No | Show | 49 | H  | 5.2707900  | 3.5692470  | 0.0305140  |

### 13 (L=NHC)

| Row | Highlight | Display | Tag | Symbol | X         | Y          | Z          |
|-----|-----------|---------|-----|--------|-----------|------------|------------|
| 1   | No        | Show    | 1   | C      | 2.2364520 | -1.6575960 | -0.5280120 |
| 2   | No        | Show    | 2   | C      | 2.6588330 | -2.7922880 | -1.2845000 |

---

|    |    |      |    |    |            |            |            |
|----|----|------|----|----|------------|------------|------------|
| 3  | No | Show | 3  | C  | 3.1785960  | -1.1209230 | 0.2749980  |
| 4  | No | Show | 4  | C  | 4.5353520  | -1.5816170 | 0.4262980  |
| 5  | No | Show | 5  | N  | 4.7587090  | -2.6987060 | -0.3944110 |
| 6  | No | Show | 6  | H  | 1.9839850  | -3.3044150 | -1.9622920 |
| 7  | No | Show | 7  | N  | 3.8721530  | -3.2836900 | -1.2119910 |
| 8  | No | Show | 8  | O  | 5.4169040  | -1.1159940 | 1.1462280  |
| 9  | No | Show | 9  | C  | -1.1672740 | 0.6465960  | 0.1005430  |
| 10 | No | Show | 10 | Pd | 0.5369220  | -0.5731040 | -0.2665220 |
| 11 | No | Show | 11 | C  | -3.2446510 | 1.4052020  | 0.6074170  |
| 12 | No | Show | 12 | C  | -2.5224520 | 2.4684890  | 0.1798370  |
| 13 | No | Show | 13 | N  | -1.2548000 | 1.9907040  | -0.1153070 |
| 14 | No | Show | 14 | N  | -2.4097260 | 0.2994290  | 0.5435150  |
| 15 | No | Show | 15 | C  | -0.1612730 | 2.8397980  | -0.5220320 |
| 16 | No | Show | 16 | C  | 0.2391430  | 2.8364690  | -1.8726800 |
| 17 | No | Show | 17 | C  | 0.4395530  | 3.6667820  | 0.4491910  |
| 18 | No | Show | 18 | C  | 1.3041710  | 3.6717840  | -2.2264600 |
| 19 | No | Show | 19 | C  | 1.4934770  | 4.4875190  | 0.0336290  |
| 20 | No | Show | 20 | C  | 1.9290680  | 4.4845590  | -1.2866330 |
| 21 | No | Show | 21 | H  | 1.6479370  | 3.6903570  | -3.2562340 |
| 22 | No | Show | 22 | H  | 1.9847330  | 5.1356460  | 0.7544450  |
| 23 | No | Show | 23 | H  | 2.7572900  | 5.1222000  | -1.5858150 |
| 24 | No | Show | 24 | C  | -2.8422590 | -1.0160070 | 0.9540490  |
| 25 | No | Show | 25 | C  | -2.3605900 | -1.5377410 | 2.1699580  |
| 26 | No | Show | 26 | C  | -3.7882300 | -1.6967640 | 0.1598320  |
| 27 | No | Show | 27 | C  | -2.8390560 | -2.7899340 | 2.5708500  |
| 28 | No | Show | 28 | C  | -4.2361330 | -2.9399420 | 0.6172250  |
| 29 | No | Show | 29 | C  | -3.7661240 | -3.4866850 | 1.8058570  |
| 30 | No | Show | 30 | H  | -2.4852600 | -3.2223990 | 3.5028660  |
| 31 | No | Show | 31 | H  | -4.9593130 | -3.4950430 | 0.0265750  |
| 32 | No | Show | 32 | H  | -4.1242380 | -4.4584950 | 2.1367190  |
| 33 | No | Show | 33 | H  | -2.7905660 | 3.5073080  | 0.0628320  |
| 34 | No | Show | 34 | H  | -4.2634810 | 1.3360480  | 0.9549090  |
| 35 | No | Show | 35 | C  | -0.4862080 | 2.0292890  | -2.9378380 |
| 36 | No | Show | 36 | H  | -0.9939720 | 1.1931560  | -2.4507950 |
| 37 | No | Show | 37 | C  | -0.0419350 | 3.7398160  | 1.8922730  |
| 38 | No | Show | 38 | H  | -0.7299100 | 2.9072830  | 2.0671950  |
| 39 | No | Show | 39 | C  | 0.4554220  | 1.4143720  | -3.9785320 |
| 40 | No | Show | 40 | H  | -0.1058880 | 0.7263800  | -4.6170960 |
| 41 | No | Show | 41 | H  | 0.9079290  | 2.1703590  | -4.6295060 |
| 42 | No | Show | 42 | H  | 1.2543860  | 0.8397200  | -3.5024380 |
| 43 | No | Show | 43 | C  | -1.5591330 | 2.8980400  | -3.6165560 |
| 44 | No | Show | 44 | H  | -2.1103340 | 2.3095380  | -4.3577570 |
| 45 | No | Show | 45 | H  | -2.2819800 | 3.2883490  | -2.8927580 |
| 46 | No | Show | 46 | H  | -1.1071610 | 3.7530020  | -4.1317950 |
| 47 | No | Show | 47 | C  | 1.0922720  | 3.6071560  | 2.9173910  |

---

|    |    |      |    |    |            |            |            |
|----|----|------|----|----|------------|------------|------------|
| 48 | No | Show | 48 | H  | 0.6777810  | 3.5825390  | 3.9305760  |
| 49 | No | Show | 49 | H  | 1.6689170  | 2.6907050  | 2.7703030  |
| 50 | No | Show | 50 | H  | 1.7899410  | 4.4491460  | 2.8728910  |
| 51 | No | Show | 51 | C  | -0.8196640 | 5.0444000  | 2.1375790  |
| 52 | No | Show | 52 | H  | -1.6581080 | 5.1578210  | 1.4441730  |
| 53 | No | Show | 53 | H  | -1.2191090 | 5.0676430  | 3.1571030  |
| 54 | No | Show | 54 | H  | -0.1701730 | 5.9168660  | 2.0109300  |
| 55 | No | Show | 55 | C  | -1.3987030 | -0.7923950 | 3.0832110  |
| 56 | No | Show | 56 | H  | -1.0272330 | 0.0867010  | 2.5504140  |
| 57 | No | Show | 57 | C  | -4.3563130 | -1.1342490 | -1.1359610 |
| 58 | No | Show | 58 | H  | -3.7225320 | -0.2996440 | -1.4500840 |
| 59 | No | Show | 59 | C  | -5.7861440 | -0.6039180 | -0.9302650 |
| 60 | No | Show | 60 | H  | -6.4659760 | -1.4144370 | -0.6465460 |
| 61 | No | Show | 61 | H  | -5.8436390 | 0.1577180  | -0.1469340 |
| 62 | No | Show | 62 | H  | -6.1642200 | -0.1598680 | -1.8574190 |
| 63 | No | Show | 63 | C  | -4.3444510 | -2.1585170 | -2.2794780 |
| 64 | No | Show | 64 | H  | -5.0644860 | -2.9668210 | -2.1122730 |
| 65 | No | Show | 65 | H  | -4.6232090 | -1.6672880 | -3.2177110 |
| 66 | No | Show | 66 | H  | -3.3524690 | -2.5961700 | -2.4054810 |
| 67 | No | Show | 67 | C  | -0.1739780 | -1.6419470 | 3.4487490  |
| 68 | No | Show | 68 | H  | 0.3318060  | -2.0139800 | 2.5529900  |
| 69 | No | Show | 69 | H  | 0.5441980  | -1.0448210 | 4.0195740  |
| 70 | No | Show | 70 | H  | -0.4442110 | -2.5058140 | 4.0648240  |
| 71 | No | Show | 71 | C  | -2.1221760 | -0.2928870 | 4.3439840  |
| 72 | No | Show | 72 | H  | -2.9692860 | 0.3527510  | 4.0909320  |
| 73 | No | Show | 73 | H  | -2.5067700 | -1.1279430 | 4.9391420  |
| 74 | No | Show | 74 | H  | -1.4359090 | 0.2799500  | 4.9772250  |
| 75 | No | Show | 75 | Br | 2.5678430  | 0.4062270  | 1.2789970  |
| 76 | No | Show | 76 | Br | -0.5910370 | -1.8420700 | -2.0379130 |
| 77 | No | Show | 77 | C  | 6.0924130  | -3.2891000 | -0.3593360 |
| 78 | No | Show | 78 | H  | 6.8362560  | -2.5496120 | -0.6644060 |
| 79 | No | Show | 79 | H  | 6.3299100  | -3.6144660 | 0.6559620  |
| 80 | No | Show | 80 | H  | 6.0900950  | -4.1354810 | -1.0431230 |

### 13\*

| Row | Highlight |      | Display Tag |    | Symbol X  | Y          | Z          |
|-----|-----------|------|-------------|----|-----------|------------|------------|
| 1   | No        | Show | 1           | C  | 3.9544950 | 0.5778860  | -1.2073680 |
| 2   | No        | Show | 2           | C  | 3.5510470 | 1.5544870  | -2.1721850 |
| 3   | No        | Show | 3           | C  | 5.1548960 | 0.7890880  | -0.5992500 |
| 4   | No        | Show | 4           | N  | 4.2629270 | 2.6030060  | -2.4967960 |
| 5   | No        | Show | 5           | C  | 5.9881310 | 1.9498230  | -0.8905160 |
| 6   | No        | Show | 6           | N  | 5.4327660 | 2.7781950  | -1.8753380 |
| 7   | No        | Show | 7           | Pd | 2.9575970 | -1.1679380 | -1.0178160 |
| 8   | No        | Show | 8           | P  | 1.4314540 | -0.2052370 | 0.3894150  |



---

|    |    |      |    |    |            |            |            |
|----|----|------|----|----|------------|------------|------------|
| 9  | No | Show | 9  | C  | 1.5573610  | 1.5966330  | 0.6541350  |
| 10 | No | Show | 10 | C  | 2.6157700  | 2.0670680  | 1.4479110  |
| 11 | No | Show | 11 | C  | 0.6979750  | 2.5170170  | 0.0437890  |
| 12 | No | Show | 12 | C  | 2.7956660  | 3.4339200  | 1.6396800  |
| 13 | No | Show | 13 | H  | 3.3004190  | 1.3670040  | 1.9202750  |
| 14 | No | Show | 14 | C  | 0.8874890  | 3.8871320  | 0.2324270  |
| 15 | No | Show | 15 | H  | -0.1347350 | 2.1728360  | -0.5599110 |
| 16 | No | Show | 16 | C  | 1.9330230  | 4.3485260  | 1.0305320  |
| 17 | No | Show | 17 | H  | 3.6171340  | 3.7833400  | 2.2594200  |
| 18 | No | Show | 18 | H  | 0.2125600  | 4.5924450  | -0.2455690 |
| 19 | No | Show | 19 | H  | 2.0782760  | 5.4157000  | 1.1764930  |
| 20 | No | Show | 20 | C  | 1.5313100  | -0.9202540 | 2.0704500  |
| 21 | No | Show | 21 | C  | 0.9405750  | -0.2463710 | 3.1508980  |
| 22 | No | Show | 22 | C  | 2.1590380  | -2.1526560 | 2.2851610  |
| 23 | No | Show | 23 | C  | 0.9748570  | -0.8042940 | 4.4265750  |
| 24 | No | Show | 24 | H  | 0.4661970  | 0.7191880  | 3.0028010  |
| 25 | No | Show | 25 | C  | 2.1859770  | -2.7082750 | 3.5650150  |
| 26 | No | Show | 26 | H  | 2.6105610  | -2.6853010 | 1.4521190  |
| 27 | No | Show | 27 | C  | 1.5965060  | -2.0376870 | 4.6357680  |
| 28 | No | Show | 28 | H  | 0.5190930  | -0.2730440 | 5.2583180  |
| 29 | No | Show | 29 | H  | 2.6744860  | -3.6664490 | 3.7199260  |
| 30 | No | Show | 30 | H  | 1.6252960  | -2.4700540 | 5.6326990  |
| 31 | No | Show | 31 | O  | 7.0624340  | 2.2353180  | -0.3681590 |
| 32 | No | Show | 32 | H  | 2.6104220  | 1.4646720  | -2.7080000 |
| 33 | No | Show | 33 | H  | -2.7069660 | -0.9067220 | -2.4564600 |
| 34 | No | Show | 34 | C  | -1.9874480 | -1.0341720 | -1.6580590 |
| 35 | No | Show | 35 | C  | -2.0291650 | -2.0197050 | -0.6282230 |
| 36 | No | Show | 36 | C  | -0.8692500 | -0.1892550 | -1.4231520 |
| 37 | No | Show | 37 | C  | -0.9376600 | -1.7874120 | 0.2505730  |
| 38 | No | Show | 38 | H  | -2.7906220 | -2.7796410 | -0.5065360 |
| 39 | No | Show | 39 | C  | -0.2083730 | -0.6446590 | -0.2289620 |
| 40 | No | Show | 40 | Fe | -2.1457280 | -0.1439080 | 0.1853820  |
| 41 | No | Show | 41 | C  | -2.7338160 | 0.2220450  | 2.1082000  |
| 42 | No | Show | 42 | C  | -2.2263170 | 1.4177040  | 1.5150200  |
| 43 | No | Show | 43 | C  | -3.8360930 | -0.2242110 | 1.3209630  |
| 44 | No | Show | 44 | H  | -2.3263700 | -0.2858630 | 2.9738440  |
| 45 | No | Show | 45 | C  | -3.0031530 | 1.6997940  | 0.3534710  |
| 46 | No | Show | 46 | C  | -4.0192770 | 0.6902270  | 0.2298310  |
| 47 | No | Show | 47 | H  | -4.4103000 | -1.1273110 | 1.4842790  |
| 48 | No | Show | 48 | H  | -2.8565480 | 2.5276670  | -0.3301960 |
| 49 | No | Show | 49 | H  | -0.5738900 | 0.6432190  | -2.0489070 |
| 50 | No | Show | 50 | H  | -0.6963160 | -2.3587690 | 1.1370940  |
| 51 | No | Show | 51 | P  | -5.2527770 | 0.6862670  | -1.1201890 |
| 52 | No | Show | 52 | C  | -6.0372360 | -0.9749220 | -0.9141720 |
| 53 | No | Show | 53 | C  | -6.9118360 | -1.2959410 | 0.1347490  |

---

|    |    |      |    |    |            |            |            |
|----|----|------|----|----|------------|------------|------------|
| 54 | No | Show | 54 | C  | -5.7584770 | -1.9535650 | -1.8784810 |
| 55 | No | Show | 55 | C  | -7.4717270 | -2.5699940 | 0.2282300  |
| 56 | No | Show | 56 | H  | -7.1660430 | -0.5423920 | 0.8760880  |
| 57 | No | Show | 57 | C  | -6.3136660 | -3.2312870 | -1.7841140 |
| 58 | No | Show | 58 | H  | -5.1138700 | -1.7112890 | -2.7206010 |
| 59 | No | Show | 59 | C  | -7.1697830 | -3.5427820 | -0.7276420 |
| 60 | No | Show | 60 | H  | -8.1493810 | -2.8024100 | 1.0462580  |
| 61 | No | Show | 61 | H  | -6.0853000 | -3.9772840 | -2.5412960 |
| 62 | No | Show | 62 | H  | -7.6092190 | -4.5344500 | -0.6552790 |
| 63 | No | Show | 63 | C  | -6.5598610 | 1.7847680  | -0.4164480 |
| 64 | No | Show | 64 | C  | -7.6442610 | 2.0975640  | -1.2517060 |
| 65 | No | Show | 65 | C  | -6.5119490 | 2.3561900  | 0.8621050  |
| 66 | No | Show | 66 | C  | -8.6669410 | 2.9356060  | -0.8111700 |
| 67 | No | Show | 67 | H  | -7.6914390 | 1.6787390  | -2.2552850 |
| 68 | No | Show | 68 | C  | -7.5299090 | 3.2072200  | 1.2988670  |
| 69 | No | Show | 69 | H  | -5.6785500 | 2.1377400  | 1.5240770  |
| 70 | No | Show | 70 | C  | -8.6117790 | 3.4959360  | 0.4673770  |
| 71 | No | Show | 71 | H  | -9.5025290 | 3.1595420  | -1.4697730 |
| 72 | No | Show | 72 | H  | -7.4768530 | 3.6419650  | 2.2942960  |
| 73 | No | Show | 73 | H  | -9.4041380 | 4.1568620  | 0.8094790  |
| 74 | No | Show | 74 | H  | -1.3723990 | 1.9896570  | 1.8548600  |
| 75 | No | Show | 75 | C  | 6.1928800  | 3.9658950  | -2.2480980 |
| 76 | No | Show | 76 | H  | 7.1891360  | 3.6770050  | -2.5891820 |
| 77 | No | Show | 77 | H  | 6.3063190  | 4.6250010  | -1.3842200 |
| 78 | No | Show | 78 | H  | 5.6434390  | 4.4668180  | -3.0426880 |
| 79 | No | Show | 79 | Br | 2.1411150  | -3.5043130 | -1.1880950 |
| 80 | No | Show | 80 | Br | 5.8448280  | -0.4082740 | 0.7003780  |

### 13\*\*

| Row | Highlight | Display | Tag | Symbol | X          | Y          | Z          |
|-----|-----------|---------|-----|--------|------------|------------|------------|
| 1   | No        | Show    | 1   | C      | -2.2538280 | -1.1527350 | 0.7046250  |
| 2   | No        | Show    | 2   | C      | -2.8216600 | -1.1727560 | 2.0178140  |
| 3   | No        | Show    | 3   | C      | -3.0984880 | -1.4573350 | -0.3165740 |
| 4   | No        | Show    | 4   | N      | -4.0736890 | -1.4464110 | 2.2767040  |
| 5   | No        | Show    | 5   | C      | -4.5054470 | -1.7711720 | -0.1083290 |
| 6   | No        | Show    | 6   | N      | -4.8730220 | -1.7285310 | 1.2423670  |
| 7   | No        | Show    | 7   | Pd     | -0.2573190 | -0.7673740 | 0.4612820  |
| 8   | No        | Show    | 8   | P      | -0.8127480 | 1.5030890  | 0.1008970  |
| 9   | No        | Show    | 9   | C      | -2.5772250 | 1.9620210  | -0.0958710 |
| 10  | No        | Show    | 10  | C      | -3.3959280 | 2.0608950  | 1.0388550  |

---

|    |    |      |    |    |            |            |            |
|----|----|------|----|----|------------|------------|------------|
| 11 | No | Show | 11 | C  | -3.1391050 | 2.1483150  | -1.3638700 |
| 12 | No | Show | 12 | C  | -4.7517660 | 2.3491760  | 0.9041830  |
| 13 | No | Show | 13 | H  | -2.9784200 | 1.9156530  | 2.0314390  |
| 14 | No | Show | 14 | C  | -4.4989460 | 2.4320640  | -1.4946840 |
| 15 | No | Show | 15 | H  | -2.5224470 | 2.0675390  | -2.2537360 |
| 16 | No | Show | 16 | C  | -5.3074860 | 2.5335370  | -0.3636340 |
| 17 | No | Show | 17 | H  | -5.3750920 | 2.4204520  | 1.7917520  |
| 18 | No | Show | 18 | H  | -4.9258550 | 2.5649250  | -2.4851710 |
| 19 | No | Show | 19 | H  | -6.3675740 | 2.7491720  | -0.4688780 |
| 20 | No | Show | 20 | C  | -0.2884460 | 2.5812070  | 1.4911590  |
| 21 | No | Show | 21 | C  | -0.6471600 | 3.9375080  | 1.5388810  |
| 22 | No | Show | 22 | C  | 0.4499960  | 2.0357530  | 2.5483120  |
| 23 | No | Show | 23 | C  | -0.2416790 | 4.7360070  | 2.6060080  |
| 24 | No | Show | 24 | H  | -1.2692580 | 4.3645920  | 0.7565310  |
| 25 | No | Show | 25 | C  | 0.8519760  | 2.8357940  | 3.6196660  |
| 26 | No | Show | 26 | H  | 0.7056440  | 0.9787330  | 2.5398800  |
| 27 | No | Show | 27 | C  | 0.5135520  | 4.1881440  | 3.6462520  |
| 28 | No | Show | 28 | H  | -0.5261260 | 5.7849470  | 2.6320320  |
| 29 | No | Show | 29 | H  | 1.4238780  | 2.3963950  | 4.4326130  |
| 30 | No | Show | 30 | H  | 0.8231570  | 4.8116210  | 4.4811320  |
| 31 | No | Show | 31 | O  | -5.3377770 | -2.0498290 | -0.9696050 |
| 32 | No | Show | 32 | H  | -2.2121210 | -0.9733590 | 2.8940280  |
| 33 | No | Show | 33 | H  | 1.4044830  | 4.3358510  | -3.5227970 |
| 34 | No | Show | 34 | C  | 0.9461180  | 3.4896070  | -3.0251190 |
| 35 | No | Show | 35 | C  | 0.8535140  | 2.1618550  | -3.5402420 |
| 36 | No | Show | 36 | C  | 0.3955720  | 3.4987970  | -1.7099550 |
| 37 | No | Show | 37 | C  | 0.2479150  | 1.3431280  | -2.5458030 |
| 38 | No | Show | 38 | H  | 1.2245760  | 1.8226190  | -4.4995730 |
| 39 | No | Show | 39 | C  | -0.0418880 | 2.1645180  | -1.4001330 |
| 40 | No | Show | 40 | Fe | 1.9383570  | 2.1810600  | -1.7971180 |
| 41 | No | Show | 41 | C  | 3.5407110  | 0.9210910  | -1.9348370 |
| 42 | No | Show | 42 | C  | 2.9415660  | 0.8465100  | -0.6326850 |
| 43 | No | Show | 43 | C  | 3.9525450  | 2.2670370  | -2.1631430 |
| 44 | No | Show | 44 | H  | 3.6245460  | 0.1006910  | -2.6361270 |
| 45 | No | Show | 45 | C  | 2.9927910  | 2.1681440  | -0.0652930 |
| 46 | No | Show | 46 | C  | 3.6219030  | 3.0343210  | -1.0062720 |
| 47 | No | Show | 47 | H  | 4.4015280  | 2.6459340  | -3.0733770 |
| 48 | No | Show | 48 | H  | 2.6037520  | 2.4611120  | 0.9012030  |
| 49 | No | Show | 49 | H  | 3.7727860  | 4.0999330  | -0.8818660 |
| 50 | No | Show | 50 | H  | 0.3708770  | 4.3500330  | -1.0422860 |
| 51 | No | Show | 51 | H  | 0.0603340  | 0.2789360  | -2.6119300 |
| 52 | No | Show | 52 | P  | 2.1904260  | -0.6293900 | 0.1452070  |
| 53 | No | Show | 53 | C  | 2.7818260  | -1.9584860 | -0.9761100 |
| 54 | No | Show | 54 | C  | 4.1000010  | -2.4293190 | -0.9303000 |
| 55 | No | Show | 55 | C  | 1.8993260  | -2.4814060 | -1.9289350 |

---

|    |    |      |    |    |            |            |            |
|----|----|------|----|----|------------|------------|------------|
| 56 | No | Show | 56 | C  | 4.5328190  | -3.3967850 | -1.8362570 |
| 57 | No | Show | 57 | H  | 4.7900940  | -2.0516080 | -0.1807680 |
| 58 | No | Show | 58 | C  | 2.3369000  | -3.4426430 | -2.8400230 |
| 59 | No | Show | 59 | H  | 0.8599600  | -2.1645180 | -1.9409390 |
| 60 | No | Show | 60 | C  | 3.6537970  | -3.9007830 | -2.7968200 |
| 61 | No | Show | 61 | H  | 5.5557290  | -3.7616360 | -1.7865380 |
| 62 | No | Show | 62 | H  | 1.6397210  | -3.8478380 | -3.5687150 |
| 63 | No | Show | 63 | H  | 3.9908080  | -4.6587480 | -3.4995210 |
| 64 | No | Show | 64 | C  | 3.2061630  | -0.7947830 | 1.6735600  |
| 65 | No | Show | 65 | C  | 4.4621720  | -0.1807550 | 1.7993590  |
| 66 | No | Show | 66 | C  | 2.7159120  | -1.5641910 | 2.7383360  |
| 67 | No | Show | 67 | C  | 5.2121560  | -0.3361460 | 2.9651940  |
| 68 | No | Show | 68 | H  | 4.8598900  | 0.4240270  | 0.9894470  |
| 69 | No | Show | 69 | C  | 3.4708060  | -1.7188080 | 3.9012180  |
| 70 | No | Show | 70 | H  | 1.7541690  | -2.0631780 | 2.6452010  |
| 71 | No | Show | 71 | C  | 4.7186640  | -1.1056210 | 4.0197570  |
| 72 | No | Show | 72 | H  | 6.1840200  | 0.1445950  | 3.0466060  |
| 73 | No | Show | 73 | H  | 3.0797630  | -2.3251410 | 4.7143520  |
| 74 | No | Show | 74 | H  | 5.3043630  | -1.2272940 | 4.9276280  |
| 75 | No | Show | 75 | C  | -6.2588400 | -2.0466940 | 1.5623770  |
| 76 | No | Show | 76 | H  | -6.5006060 | -3.0538670 | 1.2152350  |
| 77 | No | Show | 77 | H  | -6.3657340 | -1.9787610 | 2.6434160  |
| 78 | No | Show | 78 | H  | -6.9305250 | -1.3449870 | 1.0625520  |
| 79 | No | Show | 79 | Br | -2.5264630 | -1.5318860 | -2.1257370 |
| 80 | No | Show | 80 | Br | -0.0387300 | -3.2071850 | 1.0251950  |

#### 14

| Row | Highlight |      | Display Tag |    | Symbol | X         | Y          | Z          |
|-----|-----------|------|-------------|----|--------|-----------|------------|------------|
| 1   | No        | Show | 1           | C  | -      | 3.2753450 | -0.3656940 | -0.1399200 |
| 2   | No        | Show | 2           | C  | -      | 4.5576880 | 0.2316860  | -0.0758170 |
| 3   | No        | Show | 3           | C  | -      | 2.1033170 | 0.3127360  | -0.1102310 |
| 4   | No        | Show | 4           | N  | -      | 4.6653600 | 1.5300310  | 0.0252400  |
| 5   | No        | Show | 5           | C  | -      | 2.2154370 | 1.7611650  | -0.0146980 |
| 6   | No        | Show | 6           | N  | -      | 3.5390540 | 2.2470910  | 0.0598260  |
| 7   | No        | Show | 7           | Pd | -      | 0.6070490 | -1.0812320 | -0.0676610 |
| 8   | No        | Show | 8           | P  | 1.     | 1476500   | 0.4019010  | 0.0027650  |
| 9   | No        | Show | 9           | C  | 1.     | 0890610   | 1.3504950  | 1.5614980  |
| 10  | No        | Show | 10          | C  | 0.     | 8605740   | 0.6255750  | 2.7398230  |
| 11  | No        | Show | 11          | C  | 1.     | 2771020   | 2.7348330  | 1.6244960  |
| 12  | No        | Show | 12          | C  | 0.     | 8473610   | 1.2782180  | 3.9715730  |
| 13  | No        | Show | 13          | H  | 0.     | 6966890   | -0.4492990 | 2.6952840  |
| 14  | No        | Show | 14          | C  | 1.     | 2612640   | 3.3824470  | 2.8594330  |
| 15  | No        | Show | 15          | H  | 1.     | 4048250   | 3.3121670  | 0.7146810  |
| 16  | No        | Show | 16          | C  | 1.     | 0510420   | 2.6578570  | 4.0335860  |

---

|    |    |      |    |    |            |            |            |
|----|----|------|----|----|------------|------------|------------|
| 17 | No | Show | 17 | H  | 0.6725240  | 0.7078050  | 4.8800600  |
| 18 | No | Show | 18 | H  | 1.4016450  | 4.4595650  | 2.9009880  |
| 19 | No | Show | 19 | H  | 1.0359060  | 3.1679120  | 4.9934570  |
| 20 | No | Show | 20 | C  | 1.2785800  | 1.5179580  | -1.4401990 |
| 21 | No | Show | 21 | C  | 2.4175820  | 2.3226070  | -1.5943390 |
| 22 | No | Show | 22 | C  | 0.2983670  | 1.5181590  | -2.4369920 |
| 23 | No | Show | 23 | C  | 2.5508140  | 3.1412200  | -2.7140410 |
| 24 | No | Show | 24 | H  | 3.2114280  | 2.2992160  | -0.8523050 |
| 25 | No | Show | 25 | C  | 0.4431890  | 2.3247760  | -3.5648560 |
| 26 | No | Show | 26 | H  | -0.5743350 | 0.8793240  | -2.3335620 |
| 27 | No | Show | 27 | C  | 1.5641930  | 3.1433090  | -3.7018470 |
| 28 | No | Show | 28 | H  | 3.4336000  | 3.7664360  | -2.8206300 |
| 29 | No | Show | 29 | H  | -0.3214690 | 2.3114940  | -4.3371660 |
| 30 | No | Show | 30 | H  | 1.6752280  | 3.7736620  | -4.5804990 |
| 31 | No | Show | 31 | C  | 2.8166580  | -0.3603590 | -0.0051610 |
| 32 | No | Show | 32 | C  | 3.7220830  | -0.1972170 | 1.0480240  |
| 33 | No | Show | 33 | C  | 3.2032330  | -1.0885310 | -1.1400090 |
| 34 | No | Show | 34 | C  | 5.0020490  | -0.7504280 | 0.9630670  |
| 35 | No | Show | 35 | H  | 3.4412110  | 0.3620260  | 1.9351900  |
| 36 | No | Show | 36 | C  | 4.4800070  | -1.6327100 | -1.2224470 |
| 37 | No | Show | 37 | H  | 2.5017050  | -1.2423770 | -1.9552080 |
| 38 | No | Show | 38 | C  | 5.3838590  | -1.4658090 | -0.1696940 |
| 39 | No | Show | 39 | H  | 5.6980280  | -0.6182890 | 1.7875660  |
| 40 | No | Show | 40 | H  | 4.7659010  | -2.1999310 | -2.1041880 |
| 41 | No | Show | 41 | H  | 6.3796400  | -1.8973040 | -0.2325420 |
| 42 | No | Show | 42 | Br | 0.7386170  | -3.1505130 | 0.1586080  |
| 43 | No | Show | 43 | Br | -3.0925610 | -2.2930880 | -0.2333500 |
| 44 | No | Show | 44 | H  | -5.4820170 | -0.3373890 | -0.1014540 |
| 45 | No | Show | 45 | O  | -1.2865700 | 2.5693390  | 0.0020280  |
| 46 | No | Show | 46 | C  | -3.7080070 | 3.6922950  | 0.1748440  |
| 47 | No | Show | 47 | H  | -3.1739200 | 4.0581870  | 1.0541540  |
| 48 | No | Show | 48 | H  | -3.2942400 | 4.1886310  | -0.7061480 |
| 49 | No | Show | 49 | H  | -4.7747280 | 3.8902630  | 0.2609700  |

#### 14 (L=NHC)

| Row | Highlight | Display | Tag | Symbol | X         | Y          | Z          |
|-----|-----------|---------|-----|--------|-----------|------------|------------|
| 1   | No        | Show    | 1   | C      | 3.2770090 | -0.8431560 | 0.7850370  |
| 2   | No        | Show    | 2   | C      | 4.6177750 | -1.1669770 | 1.0991320  |
| 3   | No        | Show    | 3   | C      | 2.4334610 | -1.5638580 | 0.0211800  |
| 4   | No        | Show    | 4   | C      | 2.9754220 | -2.8296080 | -0.4803000 |
| 5   | No        | Show    | 5   | N      | 4.3451600 | -3.0387560 | -0.1424060 |
| 6   | No        | Show    | 6   | H      | 5.2622220 | -0.5496700 | 1.7175080  |
| 7   | No        | Show    | 7   | N      | 5.1280300 | -2.2678970 | 0.6152890  |
| 8   | No        | Show    | 8   | O      | 2.4017010 | -3.6956670 | -1.1241050 |

---

|    |    |      |    |    |            |            |            |
|----|----|------|----|----|------------|------------|------------|
| 9  | No | Show | 9  | C  | -1.0895660 | 0.6597220  | -0.0097960 |
| 10 | No | Show | 10 | Pd | 0.6612010  | -0.5228770 | -0.0440120 |
| 11 | No | Show | 11 | C  | -3.2330720 | 1.3727410  | 0.1906680  |
| 12 | No | Show | 12 | C  | -2.5066890 | 2.4135670  | -0.2815590 |
| 13 | No | Show | 13 | N  | -1.1982760 | 1.9663400  | -0.3872210 |
| 14 | No | Show | 14 | N  | -2.3590270 | 0.3065860  | 0.3438140  |
| 15 | No | Show | 15 | C  | -0.0974210 | 2.8233010  | -0.7563090 |
| 16 | No | Show | 16 | C  | 0.4681250  | 2.6952400  | -2.0403350 |
| 17 | No | Show | 17 | C  | 0.3437060  | 3.7826440  | 0.1783990  |
| 18 | No | Show | 18 | C  | 1.5405600  | 3.5369760  | -2.3539950 |
| 19 | No | Show | 19 | C  | 1.4108490  | 4.6059820  | -0.1976450 |
| 20 | No | Show | 20 | C  | 2.0121270  | 4.4781160  | -1.4446780 |
| 21 | No | Show | 21 | H  | 2.0113600  | 3.4579250  | -3.3291180 |
| 22 | No | Show | 22 | H  | 1.7807120  | 5.3552740  | 0.4973860  |
| 23 | No | Show | 23 | H  | 2.8481680  | 5.1197450  | -1.7122600 |
| 24 | No | Show | 24 | C  | -2.7930180 | -0.9736570 | 0.8530140  |
| 25 | No | Show | 25 | C  | -2.3940640 | -1.3602980 | 2.1472400  |
| 26 | No | Show | 26 | C  | -3.6581950 | -1.7586890 | 0.0623810  |
| 27 | No | Show | 27 | C  | -2.8697610 | -2.5829960 | 2.6325290  |
| 28 | No | Show | 28 | C  | -4.1089250 | -2.9652630 | 0.6064930  |
| 29 | No | Show | 29 | C  | -3.7173480 | -3.3804120 | 1.8737440  |
| 30 | No | Show | 30 | H  | -2.5765680 | -2.9127750 | 3.6255190  |
| 31 | No | Show | 31 | H  | -4.7691710 | -3.5983060 | 0.0206130  |
| 32 | No | Show | 32 | H  | -4.0727940 | -4.3282510 | 2.2704160  |
| 33 | No | Show | 33 | H  | -2.7956480 | 3.4187170  | -0.5475300 |
| 34 | No | Show | 34 | H  | -4.2806930 | 1.2956080  | 0.4358870  |
| 35 | No | Show | 35 | C  | -0.0954650 | 1.7477570  | -3.0865760 |
| 36 | No | Show | 36 | H  | -0.5964670 | 0.9235610  | -2.5730290 |
| 37 | No | Show | 37 | C  | -0.3191440 | 3.9916500  | 1.5340540  |
| 38 | No | Show | 38 | H  | -1.0102280 | 3.1625000  | 1.7119220  |
| 39 | No | Show | 39 | C  | 0.9786640  | 1.1061490  | -3.9704810 |
| 40 | No | Show | 40 | H  | 0.5256900  | 0.3171850  | -4.5770950 |
| 41 | No | Show | 41 | H  | 1.4399220  | 1.8247690  | -4.6573830 |
| 42 | No | Show | 42 | H  | 1.7640470  | 0.6423300  | -3.3678330 |
| 43 | No | Show | 43 | C  | -1.1460610 | 2.4761720  | -3.9426330 |
| 44 | No | Show | 44 | H  | -1.5790690 | 1.7874260  | -4.6758440 |
| 45 | No | Show | 45 | H  | -1.9639120 | 2.8714280  | -3.3312720 |
| 46 | No | Show | 46 | H  | -0.7000190 | 3.3155650  | -4.4878040 |
| 47 | No | Show | 47 | C  | 0.6774830  | 4.0000340  | 2.7011870  |
| 48 | No | Show | 48 | H  | 0.1392220  | 4.0892310  | 3.6506500  |
| 49 | No | Show | 49 | H  | 1.2672130  | 3.0803740  | 2.7381410  |
| 50 | No | Show | 50 | H  | 1.3749010  | 4.8415630  | 2.6429970  |
| 51 | No | Show | 51 | C  | -1.1441220 | 5.2901710  | 1.5377430  |
| 52 | No | Show | 52 | H  | -1.8836270 | 5.3063780  | 0.7316560  |
| 53 | No | Show | 53 | H  | -1.6770560 | 5.4037910  | 2.4877980  |

---

|    |    |      |    |    |            |            |            |
|----|----|------|----|----|------------|------------|------------|
| 54 | No | Show | 54 | H  | -0.4990600 | 6.1653450  | 1.4074230  |
| 55 | No | Show | 55 | C  | -1.5287280 | -0.4973000 | 3.0533610  |
| 56 | No | Show | 56 | H  | -1.1092560 | 0.3173770  | 2.4574430  |
| 57 | No | Show | 57 | C  | -4.1380810 | -1.3521980 | -1.3243230 |
| 58 | No | Show | 58 | H  | -3.5223730 | -0.5157930 | -1.6667920 |
| 59 | No | Show | 59 | C  | -5.6055090 | -0.8899060 | -1.2894600 |
| 60 | No | Show | 60 | H  | -6.2666000 | -1.7101470 | -0.9896320 |
| 61 | No | Show | 61 | H  | -5.7716000 | -0.0666720 | -0.5877300 |
| 62 | No | Show | 62 | H  | -5.9218080 | -0.5529260 | -2.2825380 |
| 63 | No | Show | 63 | C  | -3.9752270 | -2.4770480 | -2.3571690 |
| 64 | No | Show | 64 | H  | -4.6666010 | -3.3056730 | -2.1706880 |
| 65 | No | Show | 65 | H  | -4.1946430 | -2.0922240 | -3.3587780 |
| 66 | No | Show | 66 | H  | -2.9556300 | -2.8668360 | -2.3564090 |
| 67 | No | Show | 67 | C  | -0.3427420 | -1.2760220 | 3.6384840  |
| 68 | No | Show | 68 | H  | 0.2351370  | -1.7697750 | 2.8517760  |
| 69 | No | Show | 69 | H  | 0.3256260  | -0.5962790 | 4.1769190  |
| 70 | No | Show | 70 | H  | -0.6677930 | -2.0436880 | 4.3485590  |
| 71 | No | Show | 71 | C  | -2.3760390 | 0.1398530  | 4.1668720  |
| 72 | No | Show | 72 | H  | -3.1920000 | 0.7418540  | 3.7540080  |
| 73 | No | Show | 73 | H  | -2.8212760 | -0.6240890 | 4.8130050  |
| 74 | No | Show | 74 | H  | -1.7574170 | 0.7905690  | 4.7948070  |
| 75 | No | Show | 75 | Br | 2.4661350  | 0.8055100  | 1.4747870  |
| 76 | No | Show | 76 | Br | -0.3346410 | -1.8841640 | -1.8065640 |
| 77 | No | Show | 77 | C  | 4.9572790  | -4.2666060 | -0.6387670 |
| 78 | No | Show | 78 | H  | 4.4639490  | -5.1372280 | -0.1993800 |
| 79 | No | Show | 79 | H  | 4.8412340  | -4.3246320 | -1.7227780 |
| 80 | No | Show | 80 | H  | 6.0098350  | -4.2433830 | -0.3622450 |

#### 14\*

| Row | Highlight |      | Display Tag |    | Symbol X   | Y          | Z          |
|-----|-----------|------|-------------|----|------------|------------|------------|
| 1   | No        | Show | 1           | C  | -5.0940680 | 1.2908180  | -0.8245660 |
| 2   | No        | Show | 2           | C  | -5.6556840 | 2.5525980  | -1.1731850 |
| 3   | No        | Show | 3           | C  | -3.8094580 | 0.9664240  | -1.1348000 |
| 4   | No        | Show | 4           | N  | -4.9641960 | 3.4630330  | -1.8018630 |
| 5   | No        | Show | 5           | C  | -3.0185670 | 1.9848210  | -1.8175740 |
| 6   | No        | Show | 6           | N  | -3.6951680 | 3.1764270  | -2.1088720 |
| 7   | No        | Show | 7           | Pd | -3.1029380 | -0.9172670 | -0.9868440 |
| 8   | No        | Show | 8           | P  | -1.5845780 | -0.2544580 | 0.5805170  |
| 9   | No        | Show | 9           | C  | -1.6712280 | 1.4759960  | 1.1563140  |
| 10  | No        | Show | 10          | C  | -2.7596590 | 1.8337090  | 1.9673100  |
| 11  | No        | Show | 11          | C  | -0.7357290 | 2.4486620  | 0.7915890  |
| 12  | No        | Show | 12          | C  | -2.8959310 | 3.1422990  | 2.4217840  |
| 13  | No        | Show | 13          | H  | -3.5020900 | 1.0898820  | 2.2466220  |
| 14  | No        | Show | 14          | C  | -0.8777320 | 3.7602270  | 1.2483040  |

---

|    |    |      |    |    |            |            |            |
|----|----|------|----|----|------------|------------|------------|
| 15 | No | Show | 15 | H  | 0.1013820  | 2.1867870  | 0.1550130  |
| 16 | No | Show | 16 | C  | -1.9538270 | 4.1097720  | 2.0633930  |
| 17 | No | Show | 17 | H  | -3.7408050 | 3.4073790  | 3.0519330  |
| 18 | No | Show | 18 | H  | -0.1435240 | 4.5091780  | 0.9620930  |
| 19 | No | Show | 19 | H  | -2.0615810 | 5.1322700  | 2.4162210  |
| 20 | No | Show | 20 | C  | -1.7257020 | -1.2124700 | 2.1364620  |
| 21 | No | Show | 21 | C  | -1.0290060 | -0.7688630 | 3.2722450  |
| 22 | No | Show | 22 | C  | -2.5012610 | -2.3736920 | 2.2143180  |
| 23 | No | Show | 23 | C  | -1.1039730 | -1.4839320 | 4.4646410  |
| 24 | No | Show | 24 | H  | -0.4369580 | 0.1402920  | 3.2297570  |
| 25 | No | Show | 25 | C  | -2.5731390 | -3.0862530 | 3.4129070  |
| 26 | No | Show | 26 | H  | -3.0306100 | -2.7328810 | 1.3359080  |
| 27 | No | Show | 27 | C  | -1.8777390 | -2.6450010 | 4.5373200  |
| 28 | No | Show | 28 | H  | -0.5622880 | -1.1310520 | 5.3386720  |
| 29 | No | Show | 29 | H  | -3.1772530 | -3.9882520 | 3.4612330  |
| 30 | No | Show | 30 | H  | -1.9395320 | -3.1998990 | 5.4701110  |
| 31 | No | Show | 31 | O  | -1.8319230 | 1.8718300  | -2.1466670 |
| 32 | No | Show | 32 | H  | -6.6841080 | 2.8086030  | -0.9376480 |
| 33 | No | Show | 33 | H  | 2.4504890  | -0.6384460 | -2.4268640 |
| 34 | No | Show | 34 | C  | 1.7491460  | -0.8657250 | -1.6342880 |
| 35 | No | Show | 35 | C  | 1.7768800  | -2.0084140 | -0.7795830 |
| 36 | No | Show | 36 | C  | 0.6775870  | -0.0258710 | -1.2318250 |
| 37 | No | Show | 37 | C  | 0.7216170  | -1.8797210 | 0.1628340  |
| 38 | No | Show | 38 | H  | 2.5039240  | -2.8100770 | -0.8112210 |
| 39 | No | Show | 39 | C  | 0.0326020  | -0.6461630 | -0.1072810 |
| 40 | No | Show | 40 | Fe | 2.0054250  | -0.3010360 | 0.3229140  |
| 41 | No | Show | 41 | C  | 2.7100120  | -0.2969220 | 2.2440450  |
| 42 | No | Show | 42 | C  | 2.2164810  | 0.9983960  | 1.9013070  |
| 43 | No | Show | 43 | C  | 3.7505100  | -0.6267840 | 1.3258900  |
| 44 | No | Show | 44 | H  | 2.3345910  | -0.9358350 | 3.0340810  |
| 45 | No | Show | 45 | C  | 2.9371040  | 1.4599860  | 0.7606950  |
| 46 | No | Show | 46 | C  | 3.9069110  | 0.4604720  | 0.4020720  |
| 47 | No | Show | 47 | H  | 4.3011800  | -1.5584770 | 1.2968770  |
| 48 | No | Show | 48 | H  | 2.7849660  | 2.3985830  | 0.2410100  |
| 49 | No | Show | 49 | H  | 0.3650810  | 0.8938290  | -1.7081650 |
| 50 | No | Show | 50 | H  | 0.4774100  | -2.5788870 | 0.9517310  |
| 51 | No | Show | 51 | P  | 5.0517360  | 0.6460840  | -1.0114580 |
| 52 | No | Show | 52 | C  | 5.8173120  | -1.0349370 | -1.0977490 |
| 53 | No | Show | 53 | C  | 6.7845460  | -1.4988300 | -0.1935840 |
| 54 | No | Show | 54 | C  | 5.4198870  | -1.8785530 | -2.1447620 |
| 55 | No | Show | 55 | C  | 7.3198250  | -2.7807750 | -0.3211220 |
| 56 | No | Show | 56 | H  | 7.1302310  | -0.8520060 | 0.6090240  |
| 57 | No | Show | 57 | C  | 5.9491000  | -3.1643690 | -2.2703930 |
| 58 | No | Show | 58 | H  | 4.6997240  | -1.5230510 | -2.8782280 |
| 59 | No | Show | 59 | C  | 6.8992120  | -3.6194590 | -1.3558830 |



---

|    |    |      |    |    |            |            |            |
|----|----|------|----|----|------------|------------|------------|
| 60 | No | Show | 60 | H  | 8.0700300  | -3.1241490 | 0.3872760  |
| 61 | No | Show | 61 | H  | 5.6264200  | -3.8042330 | -3.0880050 |
| 62 | No | Show | 62 | H  | 7.3187550  | -4.6174750 | -1.4548210 |
| 63 | No | Show | 63 | C  | 6.4201480  | 1.6253360  | -0.2522600 |
| 64 | No | Show | 64 | C  | 7.4333840  | 2.0735720  | -1.1145850 |
| 65 | No | Show | 65 | C  | 6.4831730  | 1.9851680  | 1.1004600  |
| 66 | No | Show | 66 | C  | 8.4943930  | 2.8386750  | -0.6335440 |
| 67 | No | Show | 67 | H  | 7.3929100  | 1.8193480  | -2.1722140 |
| 68 | No | Show | 68 | C  | 7.5386070  | 2.7640920  | 1.5803560  |
| 69 | No | Show | 69 | H  | 5.7064200  | 1.6561970  | 1.7853140  |
| 70 | No | Show | 70 | C  | 8.5488510  | 3.1893370  | 0.7176420  |
| 71 | No | Show | 71 | H  | 9.2736930  | 3.1701070  | -1.3154750 |
| 72 | No | Show | 72 | H  | 7.5714050  | 3.0355430  | 2.6329710  |
| 73 | No | Show | 73 | H  | 9.3704920  | 3.7942660  | 1.0928180  |
| 74 | No | Show | 74 | H  | 1.4071010  | 1.5254550  | 2.3902690  |
| 75 | No | Show | 75 | Br | -6.2400590 | 0.0541260  | 0.0823360  |
| 76 | No | Show | 76 | C  | -2.9541160 | 4.2190120  | -2.8098930 |
| 77 | No | Show | 77 | H  | -2.0995610 | 4.5367360  | -2.2085710 |
| 78 | No | Show | 78 | H  | -2.5795010 | 3.8335830  | -3.7605240 |
| 79 | No | Show | 79 | H  | -3.6374730 | 5.0499220  | -2.9742360 |
| 80 | No | Show | 80 | Br | -2.6038300 | -3.3253570 | -1.2895170 |

#### 14a\*\*

| Row | Highlight |      | Display Tag |    | Symbol X   | Y          | Z          |
|-----|-----------|------|-------------|----|------------|------------|------------|
| 1   | No        | Show | 1           | C  | -3.1730250 | -1.8393870 | 0.4625630  |
| 2   | No        | Show | 2           | C  | -4.4344920 | -2.2781070 | -0.0341580 |
| 3   | No        | Show | 3           | C  | -2.2196470 | -1.3495220 | -0.3694730 |
| 4   | No        | Show | 4           | N  | -4.7383670 | -2.2313350 | -1.3017350 |
| 5   | No        | Show | 5           | C  | -2.5605920 | -1.2468690 | -1.7814720 |
| 6   | No        | Show | 6           | N  | -3.8187290 | -1.7316040 | -2.1381920 |
| 7   | No        | Show | 7           | Pd | -0.2778320 | -0.8343190 | -0.0110090 |
| 8   | No        | Show | 8           | P  | -0.9836040 | 1.4122300  | 0.1106230  |
| 9   | No        | Show | 9           | C  | -2.7509170 | 1.8062200  | -0.1969550 |
| 10  | No        | Show | 10          | C  | -3.6966640 | 1.5811230  | 0.8140720  |
| 11  | No        | Show | 11          | C  | -3.1793140 | 2.2848790  | -1.4404630 |
| 12  | No        | Show | 12          | C  | -5.0450350 | 1.8474370  | 0.5877190  |
| 13  | No        | Show | 13          | H  | -3.3837920 | 1.1978300  | 1.7817880  |
| 14  | No        | Show | 14          | C  | -4.5315710 | 2.5497100  | -1.6632230 |
| 15  | No        | Show | 15          | H  | -2.4628100 | 2.4476360  | -2.2395010 |
| 16  | No        | Show | 16          | C  | -5.4665230 | 2.3348970  | -0.6512080 |
| 17  | No        | Show | 17          | H  | -5.7675000 | 1.6685760  | 1.3799400  |
| 18  | No        | Show | 18          | H  | -4.8515270 | 2.9251240  | -2.6320920 |
| 19  | No        | Show | 19          | H  | -6.5192590 | 2.5413790  | -0.8268750 |
| 20  | No        | Show | 20          | C  | -0.7083420 | 2.1654270  | 1.7618720  |

---

|    |    |      |    |    |            |            |            |
|----|----|------|----|----|------------|------------|------------|
| 21 | No | Show | 21 | C  | -1.1748790 | 3.4550010  | 2.0621900  |
| 22 | No | Show | 22 | C  | -0.0529270 | 1.4300180  | 2.7564450  |
| 23 | No | Show | 23 | C  | -0.9550200 | 4.0080020  | 3.3217180  |
| 24 | No | Show | 24 | H  | -1.7370490 | 4.0178980  | 1.3216050  |
| 25 | No | Show | 25 | C  | 0.1624280  | 1.9837420  | 4.0200400  |
| 26 | No | Show | 26 | H  | 0.2784860  | 0.4153750  | 2.5487000  |
| 27 | No | Show | 27 | C  | -0.2807290 | 3.2752680  | 4.3020670  |
| 28 | No | Show | 28 | H  | -1.3208240 | 5.0077170  | 3.5425110  |
| 29 | No | Show | 29 | H  | 0.6706580  | 1.3990770  | 4.7822330  |
| 30 | No | Show | 30 | H  | -0.1152730 | 3.7061200  | 5.2863020  |
| 31 | No | Show | 31 | O  | -1.8237770 | -0.7627900 | -2.6563310 |
| 32 | No | Show | 32 | H  | -5.1977170 | -2.6831070 | 0.6233540  |
| 33 | No | Show | 33 | H  | 1.3787690  | 5.1228820  | -2.4832180 |
| 34 | No | Show | 34 | C  | 0.9313150  | 4.1644310  | -2.2481170 |
| 35 | No | Show | 35 | C  | 0.9790070  | 2.9924510  | -3.0619550 |
| 36 | No | Show | 36 | C  | 0.2524580  | 3.8400910  | -1.0365730 |
| 37 | No | Show | 37 | C  | 0.3318210  | 1.9371720  | -2.3606240 |
| 38 | No | Show | 38 | H  | 1.4651140  | 2.9065760  | -4.0261440 |
| 39 | No | Show | 39 | C  | -0.1201850 | 2.4523020  | -1.0955540 |
| 40 | No | Show | 40 | Fe | 1.8835410  | 2.6534570  | -1.2459170 |
| 41 | No | Show | 41 | C  | 3.5847040  | 1.5412860  | -1.4653430 |
| 42 | No | Show | 42 | C  | 2.8583160  | 1.1403420  | -0.2938160 |
| 43 | No | Show | 43 | C  | 3.9132880  | 2.9228990  | -1.3372620 |
| 44 | No | Show | 44 | H  | 3.8070910  | 0.9085070  | -2.3149900 |
| 45 | No | Show | 45 | C  | 2.7456740  | 2.2966700  | 0.5541990  |
| 46 | No | Show | 46 | C  | 3.4022700  | 3.3865280  | -0.0879020 |
| 47 | No | Show | 47 | H  | 4.4276020  | 3.5225410  | -2.0786530 |
| 48 | No | Show | 48 | H  | 2.2314540  | 2.3402270  | 1.5055930  |
| 49 | No | Show | 49 | H  | 3.4558620  | 4.4016440  | 0.2869450  |
| 50 | No | Show | 50 | H  | 0.1065820  | 4.5075080  | -0.1975160 |
| 51 | No | Show | 51 | H  | 0.1884220  | 0.9179130  | -2.6983880 |
| 52 | No | Show | 52 | P  | 2.1512120  | -0.5116150 | 0.0397960  |
| 53 | No | Show | 53 | C  | 2.9355550  | -1.4957720 | -1.2980300 |
| 54 | No | Show | 54 | C  | 4.2495460  | -1.9670990 | -1.1941510 |
| 55 | No | Show | 55 | C  | 2.2098500  | -1.7341160 | -2.4722600 |
| 56 | No | Show | 56 | C  | 4.8359030  | -2.6537700 | -2.2573090 |
| 57 | No | Show | 57 | H  | 4.8162340  | -1.8124310 | -0.2800870 |
| 58 | No | Show | 58 | C  | 2.8031430  | -2.4110120 | -3.5374140 |
| 59 | No | Show | 59 | H  | 1.1710840  | -1.4231250 | -2.5471830 |
| 60 | No | Show | 60 | C  | 4.1165610  | -2.8707870 | -3.4334800 |
| 61 | No | Show | 61 | H  | 5.8537850  | -3.0240000 | -2.1627200 |
| 62 | No | Show | 62 | H  | 2.2277630  | -2.5963750 | -4.4407340 |
| 63 | No | Show | 63 | H  | 4.5735580  | -3.4088420 | -4.2603500 |
| 64 | No | Show | 64 | C  | 3.0248070  | -0.9921710 | 1.5862360  |
| 65 | No | Show | 65 | C  | 4.2159320  | -0.3700250 | 1.9904690  |

---

|    |    |      |    |    |            |            |            |
|----|----|------|----|----|------------|------------|------------|
| 66 | No | Show | 66 | C  | 2.4824390  | -2.0102030 | 2.3838480  |
| 67 | No | Show | 67 | C  | 4.8531980  | -0.7609970 | 3.1681330  |
| 68 | No | Show | 68 | H  | 4.6505590  | 0.4240780  | 1.3901450  |
| 69 | No | Show | 69 | C  | 3.1248050  | -2.3988720 | 3.5596460  |
| 70 | No | Show | 70 | H  | 1.5690280  | -2.5111180 | 2.0712330  |
| 71 | No | Show | 71 | C  | 4.3089520  | -1.7759960 | 3.9564190  |
| 72 | No | Show | 72 | H  | 5.7759050  | -0.2700720 | 3.4680310  |
| 73 | No | Show | 73 | H  | 2.6953490  | -3.1934290 | 4.1646130  |
| 74 | No | Show | 74 | H  | 4.8057860  | -2.0799140 | 4.8745180  |
| 75 | No | Show | 75 | Br | -2.8928260 | -1.9920800 | 2.3466460  |
| 76 | No | Show | 76 | C  | -4.1914990 | -1.6848230 | -3.5458470 |
| 77 | No | Show | 77 | H  | -3.4467130 | -2.2141180 | -4.1438620 |
| 78 | No | Show | 78 | H  | -5.1675560 | -2.1572530 | -3.6405650 |
| 79 | No | Show | 79 | H  | -4.2327290 | -0.6482250 | -3.8893170 |
| 80 | No | Show | 80 | Br | 0.0972250  | -3.3214160 | -0.0821170 |

### 15a

| Row | Highlight |      | Display Tag |    | Symbol | X         | Y          | Z          |
|-----|-----------|------|-------------|----|--------|-----------|------------|------------|
| 1   | No        | Show | 1           | H  | -      | 3.0348480 | -0.2492140 | 1.7930850  |
| 2   | No        | Show | 2           | C  | -      | 2.5032870 | -0.6786710 | 0.9512510  |
| 3   | No        | Show | 3           | C  | -      | 2.8107860 | -0.4707150 | -0.4321790 |
| 4   | No        | Show | 4           | C  | -      | 1.3299600 | -1.4964890 | 1.0237800  |
| 5   | No        | Show | 5           | C  | -      | 1.8266140 | -1.1629860 | -1.2090150 |
| 6   | No        | Show | 6           | H  | -      | 3.6204340 | 0.1373630  | -0.8204720 |
| 7   | No        | Show | 7           | C  | -      | 0.9109960 | -1.7957320 | -0.3102040 |
| 8   | No        | Show | 8           | Fe | -      | 0.9344590 | 0.2132730  | -0.0031690 |
| 9   | No        | Show | 9           | C  | 0      | 3.863140  | 1.2616090  | -1.1512770 |
| 10  | No        | Show | 10          | C  | 1      | 0.818920  | 0.7224250  | -0.0205840 |
| 11  | No        | Show | 11          | C  | -      | 0.6905710 | 2.1007110  | -0.7126760 |
| 12  | No        | Show | 12          | H  | 0      | 6.064330  | 1.0090840  | -2.1829510 |
| 13  | No        | Show | 13          | C  | 0      | 4.076930  | 1.2512700  | 1.1283280  |
| 14  | No        | Show | 14          | C  | -      | 0.6763930 | 2.0944120  | 0.7192830  |
| 15  | No        | Show | 15          | H  | -      | 1.4145030 | 2.6088950  | -1.3422050 |
| 16  | No        | Show | 16          | H  | 0      | 6.520480  | 0.9833000  | 2.1504080  |
| 17  | No        | Show | 17          | H  | -      | 1.3882570 | 2.5968460  | 1.3669480  |
| 18  | No        | Show | 18          | H  | -      | 0.7905660 | -1.7623090 | 1.9246290  |
| 19  | No        | Show | 19          | H  | -      | 1.7484120 | -1.1575750 | -2.2900250 |
| 20  | No        | Show | 20          | H  | 0      | 0.093260  | -2.2904410 | -0.5963420 |
| 21  | No        | Show | 21          | O  | 3      | 6.246170  | 0.4954620  | -0.2250630 |
| 22  | No        | Show | 22          | H  | 4      | 1.106470  | 0.3652550  | 0.5998930  |
| 23  | No        | Show | 23          | O  | 2      | 4.623330  | -0.9646100 | 1.3209180  |
| 24  | No        | Show | 24          | H  | 2      | 4.301430  | -1.9035270 | 1.0975150  |
| 25  | No        | Show | 25          | O  | 2      | 2.547560  | -1.2981340 | -1.0940310 |
| 26  | No        | Show | 26          | H  | 3      | 1.268660  | -1.2693030 | -1.5109080 |
| 27  | No        | Show | 27          | B  | 2      | 3.720200  | -0.2860470 | -0.0084030 |

---

**15b**

| Row | Highlight |      | Display Tag |   | Symbol X   | Y          | Z          |
|-----|-----------|------|-------------|---|------------|------------|------------|
| 1   | No        | Show | 1           | O | 2.0558620  | 0.0684320  | 1.4042690  |
| 2   | No        | Show | 2           | H | 2.5942000  | -0.7303630 | 1.4827260  |
| 3   | No        | Show | 3           | O | 2.0996590  | -1.2461440 | -0.6042380 |
| 4   | No        | Show | 4           | H | 2.3732920  | -0.9763290 | -1.4900460 |
| 5   | No        | Show | 5           | O | 2.0432520  | 1.2018730  | -0.7479710 |
| 6   | No        | Show | 6           | H | 2.7923630  | 1.5046670  | -0.2171070 |
| 7   | No        | Show | 7           | B | 1.5578320  | 0.0129100  | 0.0020590  |
| 8   | No        | Show | 8           | C | -0.0894850 | 0.0081790  | -0.0221540 |
| 9   | No        | Show | 9           | C | -0.8406990 | 1.1966740  | -0.0085370 |
| 10  | No        | Show | 10          | C | -0.8261170 | -1.1896630 | -0.0250780 |
| 11  | No        | Show | 11          | C | -2.2395870 | 1.1982790  | 0.0130320  |
| 12  | No        | Show | 12          | H | -0.3011850 | 2.1424930  | -0.0296200 |
| 13  | No        | Show | 13          | C | -2.2245150 | -1.2093790 | -0.0027650 |
| 14  | No        | Show | 14          | H | -0.2744540 | -2.1283530 | -0.0601400 |
| 15  | No        | Show | 15          | C | -2.9436970 | -0.0099500 | 0.0190040  |
| 16  | No        | Show | 16          | H | -2.7862170 | 2.1424980  | 0.0207780  |
| 17  | No        | Show | 17          | H | -2.7592190 | -2.1604400 | -0.0074820 |
| 18  | No        | Show | 18          | H | -4.0335170 | -0.0168510 | 0.0331010  |

**20**

| Row | Highlight |      | Display Tag |    | Symbol X  | Y          | Z          |
|-----|-----------|------|-------------|----|-----------|------------|------------|
| 1   | No        | Show | 14          | H  | 3.9358130 | 1.0862420  | -2.0953260 |
| 2   | No        | Show | 10          | C  | 4.0337290 | 0.0868870  | -1.6892490 |
| 3   | No        | Show | 13          | C  | 3.0007570 | -0.8989940 | -1.6298350 |
| 4   | No        | Show | 9           | C  | 5.2043940 | -0.4714000 | -1.0957430 |
| 5   | No        | Show | 15          | C  | 3.5278910 | -2.0578180 | -0.9749040 |
| 6   | No        | Show | 12          | H  | 6.1517610 | 0.0364160  | -0.9597410 |
| 7   | No        | Show | 11          | C  | 4.8902860 | -1.7951990 | -0.6554080 |
| 8   | No        | Show | 8           | Fe | 3.6906240 | -0.4151990 | 0.2652590  |
| 9   | No        | Show | 7           | C  | 2.6287160 | 1.0385490  | 1.2297990  |
| 10  | No        | Show | 5           | C  | 4.0353100 | 1.2044890  | 1.4544650  |
| 11  | No        | Show | 4           | C  | 2.2686920 | -0.2569200 | 1.7444640  |
| 12  | No        | Show | 3           | C  | 4.5343460 | 0.0216990  | 2.0757220  |
| 13  | No        | Show | 2           | C  | 3.4422130 | -0.8785970 | 2.2540850  |
| 14  | No        | Show | 6           | H  | 5.5695250 | -0.1731060 | 2.3283750  |
| 15  | No        | Show | 1           | H  | 3.4959750 | -1.8736380 | 2.6780150  |
| 16  | No        | Show | 16          | H  | 5.5581700 | -2.4630350 | -0.1249440 |
| 17  | No        | Show | 17          | H  | 2.0263500 | -0.8314370 | -2.1136260 |
| 18  | No        | Show | 18          | H  | 2.9634400 | -2.9543760 | -0.7532790 |
| 19  | No        | Show | 19          | H  | 1.2734490 | -0.6844760 | 1.7665540  |
| 20  | No        | Show | 20          | H  | 4.6352050 | 2.0477440  | 1.1338190  |
| 21  | No        | Show | 21          | C  | 1.7663460 | 1.9592070  | 0.4706950  |
| 22  | No        | Show | 22          | C  | 2.0542080 | 3.3620950  | 0.4840540  |

---

|    |    |      |    |    |            |            |            |
|----|----|------|----|----|------------|------------|------------|
| 23 | No | Show | 23 | C  | 0.7218160  | 1.5175330  | -0.3069880 |
| 24 | No | Show | 24 | N  | 1.4130260  | 4.2474970  | -0.2290760 |
| 25 | No | Show | 25 | C  | 0.0339530  | 2.4648360  | -1.1615780 |
| 26 | No | Show | 26 | N  | 0.4391970  | 3.7978870  | -1.0273460 |
| 27 | No | Show | 27 | Pd | 0.3466260  | -0.4580090 | -0.5574340 |
| 28 | No | Show | 28 | P  | -1.8245260 | -0.1798460 | 0.1968070  |
| 29 | No | Show | 29 | C  | -3.0235900 | -0.7703790 | -1.0474270 |
| 30 | No | Show | 30 | C  | -4.0592280 | -1.6499000 | -0.7112650 |
| 31 | No | Show | 31 | C  | -2.8811380 | -0.3307230 | -2.3713670 |
| 32 | No | Show | 32 | C  | -4.9565560 | -2.0749000 | -1.6913690 |
| 33 | No | Show | 33 | H  | -4.1639360 | -2.0160450 | 0.3057900  |
| 34 | No | Show | 34 | C  | -3.7868420 | -0.7543270 | -3.3414390 |
| 35 | No | Show | 35 | H  | -2.0716100 | 0.3475910  | -2.6286270 |
| 36 | No | Show | 36 | C  | -4.8242350 | -1.6266410 | -3.0054790 |
| 37 | No | Show | 37 | H  | -5.7544470 | -2.7636680 | -1.4256810 |
| 38 | No | Show | 38 | H  | -3.6731120 | -0.4096140 | -4.3660120 |
| 39 | No | Show | 39 | H  | -5.5222420 | -1.9634160 | -3.7679360 |
| 40 | No | Show | 40 | C  | -2.3851480 | 1.4978600  | 0.6768160  |
| 41 | No | Show | 41 | C  | -3.4729150 | 2.1239970  | 0.0600400  |
| 42 | No | Show | 42 | C  | -1.7149340 | 2.1557460  | 1.7193120  |
| 43 | No | Show | 43 | C  | -3.8898500 | 3.3864080  | 0.4858020  |
| 44 | No | Show | 44 | H  | -3.9968740 | 1.6318360  | -0.7533130 |
| 45 | No | Show | 45 | C  | -2.1337200 | 3.4150410  | 2.1421530  |
| 46 | No | Show | 46 | H  | -0.8694200 | 1.6811110  | 2.2107460  |
| 47 | No | Show | 47 | C  | -3.2234760 | 4.0344050  | 1.5253610  |
| 48 | No | Show | 48 | H  | -4.7383300 | 3.8617030  | 0.0000220  |
| 49 | No | Show | 49 | H  | -1.6061270 | 3.9131860  | 2.9513890  |
| 50 | No | Show | 50 | H  | -3.5494570 | 5.0180080  | 1.8541690  |
| 51 | No | Show | 51 | C  | -2.1594390 | -1.1299730 | 1.7378420  |
| 52 | No | Show | 52 | C  | -3.1716970 | -0.7047730 | 2.6147860  |
| 53 | No | Show | 53 | C  | -1.4394810 | -2.2924250 | 2.0426360  |
| 54 | No | Show | 54 | C  | -3.4543100 | -1.4295970 | 3.7711670  |
| 55 | No | Show | 55 | H  | -3.7430410 | 0.1931370  | 2.3990680  |
| 56 | No | Show | 56 | C  | -1.7258120 | -3.0131090 | 3.2027090  |
| 57 | No | Show | 57 | H  | -0.6764830 | -2.6507520 | 1.3559870  |
| 58 | No | Show | 58 | C  | -2.7295160 | -2.5843320 | 4.0706110  |
| 59 | No | Show | 59 | H  | -4.2412570 | -1.0878310 | 4.4387560  |
| 60 | No | Show | 60 | H  | -1.1601950 | -3.9148470 | 3.4227660  |
| 61 | No | Show | 61 | H  | -2.9474980 | -3.1459840 | 4.9755920  |
| 62 | No | Show | 62 | Br | -0.0148510 | -2.8895230 | -1.1623800 |
| 63 | No | Show | 63 | H  | 2.8371640  | 3.7676730  | 1.1196620  |
| 64 | No | Show | 64 | O  | -0.8483670 | 2.1905990  | -1.9900640 |
| 65 | No | Show | 65 | C  | -0.2327140 | 4.7971950  | -1.8486700 |
| 66 | No | Show | 66 | H  | 0.1577970  | 5.7713080  | -1.5597530 |
| 67 | No | Show | 67 | H  | -0.0403450 | 4.6063550  | -2.9074300 |

---

|    |    |      |    |   |            |           |            |
|----|----|------|----|---|------------|-----------|------------|
| 68 | No | Show | 68 | H | -1.3105520 | 4.7463960 | -1.6839310 |
|----|----|------|----|---|------------|-----------|------------|

**21a**

| Row | Highlight |      | Display | Tag | Symbol     | X | Y          | Z          |
|-----|-----------|------|---------|-----|------------|---|------------|------------|
| 1   | No        | Show | 1       | H   | 3.2598920  |   | -0.0198710 | -2.5181720 |
| 2   | No        | Show | 2       | C   | 2.4732740  |   | -0.5056240 | -1.9540090 |
| 3   | No        | Show | 3       | C   | 2.5738170  |   | -1.7583620 | -1.2780880 |
| 4   | No        | Show | 4       | C   | 1.1776840  |   | 0.0318310  | -1.7126940 |
| 5   | No        | Show | 5       | C   | 1.3342620  |   | -2.0036490 | -0.6237250 |
| 6   | No        | Show | 6       | H   | 3.4510740  |   | -2.3915630 | -1.2310380 |
| 7   | No        | Show | 7       | C   | 0.4464200  |   | -0.8979180 | -0.8897250 |
| 8   | No        | Show | 8       | Fe  | 2.1502050  |   | -0.2702630 | 0.0546390  |
| 9   | No        | Show | 9       | C   | 3.6883920  |   | -0.3014750 | 1.3948520  |
| 10  | No        | Show | 10      | C   | 2.4412960  |   | -0.4989310 | 2.0638500  |
| 11  | No        | Show | 11      | C   | 3.6350780  |   | 0.9594900  | 0.7248500  |
| 12  | No        | Show | 12      | H   | 4.5144290  |   | -1.0017210 | 1.3680470  |
| 13  | No        | Show | 13      | C   | 1.6193460  |   | 0.6400720  | 1.8067370  |
| 14  | No        | Show | 14      | H   | 2.1555090  |   | -1.3745890 | 2.6338380  |
| 15  | No        | Show | 15      | C   | 2.3557810  |   | 1.5410930  | 0.9794930  |
| 16  | No        | Show | 16      | H   | 4.4125160  |   | 1.3798560  | 0.0987090  |
| 17  | No        | Show | 17      | H   | 0.5973970  |   | 0.7767420  | 2.1377220  |
| 18  | No        | Show | 18      | H   | 1.9901400  |   | 2.4787070  | 0.5814030  |
| 19  | No        | Show | 19      | H   | 0.8102520  |   | 0.9775870  | -2.0831380 |
| 20  | No        | Show | 20      | H   | 1.1228630  |   | -2.8556330 | 0.0104150  |
| 21  | No        | Show | 21      | C   | -0.9533940 |   | -0.8422250 | -0.4405550 |
| 22  | No        | Show | 22      | C   | -1.6029540 |   | -2.1056060 | -0.2051160 |
| 23  | No        | Show | 23      | C   | -1.7466650 |   | 0.2637170  | -0.2405820 |
| 24  | No        | Show | 24      | N   | -2.8334940 |   | -2.2630090 | 0.1910640  |
| 25  | No        | Show | 25      | C   | -3.1315410 |   | 0.1523630  | 0.2111170  |
| 26  | No        | Show | 26      | N   | -3.5615050 |   | -1.1646400 | 0.3991230  |
| 27  | No        | Show | 27      | H   | -1.0664440 |   | -3.0305910 | -0.3858670 |
| 28  | No        | Show | 28      | O   | -3.8976440 |   | 1.0869540  | 0.4305060  |
| 29  | No        | Show | 29      | C   | -4.9348820 |   | -1.3640990 | 0.8471990  |
| 30  | No        | Show | 30      | H   | -5.0976640 |   | -2.4374890 | 0.9218650  |
| 31  | No        | Show | 31      | H   | -5.0854280 |   | -0.8824400 | 1.8158210  |
| 32  | No        | Show | 32      | H   | -5.6287570 |   | -0.9163390 | 0.1325520  |
| 33  | No        | Show | 33      | Br  | -1.1900130 |   | 2.0502300  | -0.4737080 |

**21b**

| Row | Highlight |      | Display | Tag | Symbol     | X | Y          | Z          |
|-----|-----------|------|---------|-----|------------|---|------------|------------|
| 1   | No        | Show | 1       | C   | -0.0752350 |   | -0.7498680 | 0.0706170  |
| 2   | No        | Show | 2       | C   | 0.4983460  |   | -2.0610600 | 0.1613050  |
| 3   | No        | Show | 3       | C   | 0.8080930  |   | 0.2950810  | -0.0063400 |
| 4   | No        | Show | 4       | N   | 1.7777120  |   | -2.3137390 | 0.1803430  |
| 5   | No        | Show | 5       | C   | 2.2534690  |   | 0.0764260  | 0.0158080  |

---

|    |    |      |    |    |            |            |            |
|----|----|------|----|----|------------|------------|------------|
| 6  | No | Show | 6  | N  | 2.6122300  | -1.2740050 | 0.1120770  |
| 7  | No | Show | 7  | H  | -0.1481330 | -2.9305050 | 0.2367130  |
| 8  | No | Show | 8  | O  | 3.1187760  | 0.9437540  | -0.0473930 |
| 9  | No | Show | 9  | C  | 4.0384480  | -1.5818720 | 0.1331200  |
| 10 | No | Show | 10 | H  | 4.1347960  | -2.6625670 | 0.2152180  |
| 11 | No | Show | 11 | H  | 4.5110030  | -1.2194880 | -0.7823510 |
| 12 | No | Show | 12 | H  | 4.5135190  | -1.0849960 | 0.9815940  |
| 13 | No | Show | 13 | Br | 0.2850170  | 2.0933310  | -0.2046600 |
| 14 | No | Show | 14 | C  | -1.5545700 | -0.6380380 | 0.0609120  |
| 15 | No | Show | 15 | C  | -2.2313290 | 0.1213550  | 1.0247330  |
| 16 | No | Show | 16 | C  | -2.2972530 | -1.3442370 | -0.8955510 |
| 17 | No | Show | 17 | C  | -3.6236880 | 0.1766860  | 1.0262570  |
| 18 | No | Show | 18 | H  | -1.6671290 | 0.6587080  | 1.7813430  |
| 19 | No | Show | 19 | C  | -3.6900790 | -1.2775560 | -0.8994420 |
| 20 | No | Show | 20 | H  | -1.7824660 | -1.9308500 | -1.6527860 |
| 21 | No | Show | 21 | C  | -4.3568980 | -0.5182790 | 0.0626580  |
| 22 | No | Show | 22 | H  | -4.1369880 | 0.7634230  | 1.7834900  |
| 23 | No | Show | 23 | H  | -4.2531700 | -1.8185020 | -1.6553830 |
| 24 | No | Show | 24 | H  | -5.4426500 | -0.4694680 | 0.0630050  |

## 22a

| Row | Highlight |      | Display Tag |    | Symbol X   | Y          | Z          |
|-----|-----------|------|-------------|----|------------|------------|------------|
| 1   | No        | Show | 1           | H  | 2.9450520  | -0.1884990 | -2.6204010 |
| 2   | No        | Show | 2           | C  | 2.1078200  | -0.5629680 | -2.0441280 |
| 3   | No        | Show | 3           | C  | 1.9917780  | -1.8636770 | -1.4694660 |
| 4   | No        | Show | 4           | C  | 0.9550740  | 0.1870300  | -1.6838380 |
| 5   | No        | Show | 5           | C  | 0.7623290  | -1.9283230 | -0.7612230 |
| 6   | No        | Show | 6           | H  | 2.7281830  | -2.6557680 | -1.5275640 |
| 7   | No        | Show | 7           | C  | 0.0905480  | -0.6572620 | -0.8891980 |
| 8   | No        | Show | 8           | Fe | 1.9324840  | -0.4365730 | -0.0084310 |
| 9   | No        | Show | 9           | C  | 2.2184170  | -0.8664840 | 1.9668630  |
| 10  | No        | Show | 10          | C  | 1.6856970  | 0.4503070  | 1.8170470  |
| 11  | No        | Show | 11          | C  | 3.4569130  | -0.9219520 | 1.2564930  |
| 12  | No        | Show | 12          | H  | 1.7464970  | -1.6888460 | 2.4903240  |
| 13  | No        | Show | 13          | C  | 2.5909220  | 1.2080390  | 1.0136300  |
| 14  | No        | Show | 14          | H  | 0.7362280  | 0.7994020  | 2.2039130  |
| 15  | No        | Show | 15          | C  | 3.6865150  | 0.3591700  | 0.6668200  |
| 16  | No        | Show | 16          | H  | 4.0897420  | -1.7943620 | 1.1485510  |
| 17  | No        | Show | 17          | H  | 2.4505070  | 2.2315940  | 0.6902850  |
| 18  | No        | Show | 18          | H  | 4.5243750  | 0.6269920  | 0.0346430  |
| 19  | No        | Show | 19          | H  | 0.7665380  | 1.2098760  | -1.9729060 |
| 20  | No        | Show | 20          | H  | 0.3907960  | -2.7765570 | -0.2085880 |
| 21  | No        | Show | 21          | C  | -1.2358360 | -0.3347350 | -0.3503110 |
| 22  | No        | Show | 22          | C  | -2.1495160 | -1.4703420 | -0.0820200 |
| 23  | No        | Show | 23          | C  | -1.7615450 | 0.9114700  | -0.0912340 |

---

|    |    |      |    |    |            |            |            |
|----|----|------|----|----|------------|------------|------------|
| 24 | No | Show | 24 | N  | -3.4331880 | -1.1398510 | 0.3577950  |
| 25 | No | Show | 25 | C  | -3.0944840 | 1.0812690  | 0.3745620  |
| 26 | No | Show | 26 | N  | -3.9076800 | 0.0859820  | 0.5899020  |
| 27 | No | Show | 27 | O  | -1.8697180 | -2.6609620 | -0.2219230 |
| 28 | No | Show | 28 | H  | -3.4921610 | 2.0710220  | 0.5727680  |
| 29 | No | Show | 29 | C  | -4.3566110 | -2.2429920 | 0.6023840  |
| 30 | No | Show | 30 | H  | -4.4676100 | -2.8420050 | -0.3036270 |
| 31 | No | Show | 31 | H  | -3.9689440 | -2.8894650 | 1.3928090  |
| 32 | No | Show | 32 | H  | -5.3089110 | -1.8061460 | 0.8961650  |
| 33 | No | Show | 33 | Br | -0.8208340 | 2.5607750  | -0.2683990 |

## 22b

| Row | Highlight |      | Display Tag |    | Symbol X   | Y          | Z          |
|-----|-----------|------|-------------|----|------------|------------|------------|
| 1   | No        | Show | 1           | C  | 0.3270580  | -0.3433880 | 0.0273540  |
| 2   | No        | Show | 2           | C  | 1.3062140  | -1.4411560 | 0.0597540  |
| 3   | No        | Show | 3           | C  | 0.8260070  | 0.9307890  | -0.0193650 |
| 4   | No        | Show | 4           | N  | 2.6485610  | -1.0450760 | 0.1151370  |
| 5   | No        | Show | 5           | C  | 2.2301620  | 1.1709690  | 0.0153010  |
| 6   | No        | Show | 6           | N  | 3.1061390  | 0.2076880  | 0.0866060  |
| 7   | No        | Show | 7           | O  | 1.0272550  | -2.6379520 | 0.0464710  |
| 8   | No        | Show | 8           | H  | 2.6302430  | 2.1789420  | -0.0175290 |
| 9   | No        | Show | 9           | C  | 3.6542330  | -2.1002300 | 0.1823580  |
| 10  | No        | Show | 10          | H  | 3.4558450  | -2.7446490 | 1.0409570  |
| 11  | No        | Show | 11          | H  | 3.6152900  | -2.7135990 | -0.7207310 |
| 12  | No        | Show | 12          | H  | 4.6249650  | -1.6177450 | 0.2764660  |
| 13  | No        | Show | 13          | Br | -0.2672690 | 2.4787450  | -0.1862680 |
| 14  | No        | Show | 14          | C  | -1.1065050 | -0.7071200 | 0.0413370  |
| 15  | No        | Show | 15          | C  | -1.6202100 | -1.6040790 | -0.9059510 |
| 16  | No        | Show | 16          | C  | -1.9647110 | -0.1820380 | 1.0174040  |
| 17  | No        | Show | 17          | C  | -2.9723740 | -1.9386090 | -0.8964980 |
| 18  | No        | Show | 18          | H  | -0.9596760 | -2.0403390 | -1.6482740 |
| 19  | No        | Show | 19          | C  | -3.3133350 | -0.5325500 | 1.0354800  |
| 20  | No        | Show | 20          | H  | -1.5732150 | 0.4896170  | 1.7762330  |
| 21  | No        | Show | 21          | C  | -3.8230200 | -1.4053550 | 0.0733820  |
| 22  | No        | Show | 22          | H  | -3.3603260 | -2.6263020 | -1.6433720 |
| 23  | No        | Show | 23          | H  | -3.9648700 | -0.1246310 | 1.8038570  |
| 24  | No        | Show | 24          | H  | -4.8758980 | -1.6754340 | 0.0844680  |

## 23a

| Row | Highlight |      | Display Tag |   | Symbol X   | Y          | Z          |
|-----|-----------|------|-------------|---|------------|------------|------------|
| 1   | No        | Show | 1           | H | -3.0246530 | -2.4552380 | -2.6414990 |
| 2   | No        | Show | 2           | C | -3.1993270 | -1.4871310 | -2.1894760 |
| 3   | No        | Show | 3           | C | -4.4653460 | -0.9086160 | -1.8803850 |
| 4   | No        | Show | 4           | C | -2.1912150 | -0.5659620 | -1.7895280 |
| 5   | No        | Show | 5           | C | -4.2454400 | 0.3653380  | -1.2787420 |



---

|    |    |      |    |    |            |            |            |
|----|----|------|----|----|------------|------------|------------|
| 6  | No | Show | 6  | H  | -5.4312360 | -1.3722090 | -2.0397950 |
| 7  | No | Show | 7  | C  | -2.8356110 | 0.5810210  | -1.1908050 |
| 8  | No | Show | 8  | Fe | -3.3651670 | -1.1168550 | -0.1722580 |
| 9  | No | Show | 9  | C  | -4.6896960 | -1.3420670 | 1.3603350  |
| 10 | No | Show | 10 | C  | -3.5003780 | -0.7223130 | 1.8416030  |
| 11 | No | Show | 11 | C  | -4.3371950 | -2.6188300 | 0.8209160  |
| 12 | No | Show | 12 | H  | -5.6790310 | -0.9008530 | 1.3576680  |
| 13 | No | Show | 13 | C  | -2.4123940 | -1.6192960 | 1.6112950  |
| 14 | No | Show | 14 | H  | -3.4279590 | 0.2654400  | 2.2800810  |
| 15 | No | Show | 15 | C  | -2.9316100 | -2.7857770 | 0.9574560  |
| 16 | No | Show | 16 | H  | -5.0134920 | -3.3127570 | 0.3366680  |
| 17 | No | Show | 17 | H  | -1.3932070 | -1.5000100 | 1.9670540  |
| 18 | No | Show | 18 | H  | -2.3354340 | -3.6202580 | 0.6127200  |
| 19 | No | Show | 19 | H  | -1.1335490 | -0.6764190 | -2.0126090 |
| 20 | No | Show | 20 | H  | -4.9982700 | 1.0415130  | -0.8990610 |
| 21 | No | Show | 21 | C  | -2.1419120 | 1.6266540  | -0.4303900 |
| 22 | No | Show | 22 | C  | -2.7898090 | 2.9240080  | -0.2615120 |
| 23 | No | Show | 23 | C  | -0.9450640 | 1.3652270  | 0.2035250  |
| 24 | No | Show | 24 | N  | -2.0844850 | 3.8201900  | 0.5454160  |
| 25 | No | Show | 25 | C  | -0.4020000 | 2.3881270  | 1.0305700  |
| 26 | No | Show | 26 | N  | -0.9453930 | 3.5701790  | 1.1982490  |
| 27 | No | Show | 27 | Pd | -0.2348750 | -0.5549600 | 0.0761230  |
| 28 | No | Show | 28 | P  | 1.9903140  | 0.1401360  | -0.0222140 |
| 29 | No | Show | 29 | O  | -3.8712330 | 3.2676790  | -0.7523790 |
| 30 | No | Show | 30 | H  | 0.5069540  | 2.2403760  | 1.6044310  |
| 31 | No | Show | 31 | C  | 2.5572760  | 0.4961230  | 1.6832890  |
| 32 | No | Show | 32 | C  | 2.3753470  | -0.5217510 | 2.6351300  |
| 33 | No | Show | 33 | C  | 3.1001080  | 1.7228230  | 2.0849880  |
| 34 | No | Show | 34 | C  | 2.7584900  | -0.3189660 | 3.9584850  |
| 35 | No | Show | 35 | H  | 1.9346580  | -1.4710330 | 2.3344420  |
| 36 | No | Show | 36 | C  | 3.4699200  | 1.9238980  | 3.4168270  |
| 37 | No | Show | 37 | H  | 3.2243010  | 2.5310820  | 1.3701900  |
| 38 | No | Show | 38 | C  | 3.3060330  | 0.9045020  | 4.3533480  |
| 39 | No | Show | 39 | H  | 2.6193010  | -1.1158580 | 4.6843970  |
| 40 | No | Show | 40 | H  | 3.8825350  | 2.8830830  | 3.7186530  |
| 41 | No | Show | 41 | H  | 3.5954050  | 1.0638570  | 5.3888620  |
| 42 | No | Show | 42 | C  | 2.4041630  | 1.5952180  | -1.0665050 |
| 43 | No | Show | 43 | C  | 3.7367550  | 2.0325580  | -1.1535320 |
| 44 | No | Show | 44 | C  | 1.4355420  | 2.2068390  | -1.8679970 |
| 45 | No | Show | 45 | C  | 4.0786050  | 3.0878600  | -1.9945760 |
| 46 | No | Show | 46 | H  | 4.5145660  | 1.5362490  | -0.5789310 |
| 47 | No | Show | 47 | C  | 1.7824230  | 3.2579010  | -2.7191440 |
| 48 | No | Show | 48 | H  | 0.4080000  | 1.8589500  | -1.8326150 |
| 49 | No | Show | 49 | C  | 3.1004230  | 3.7058360  | -2.7780430 |
| 50 | No | Show | 50 | H  | 5.1125790  | 3.4188950  | -2.0487410 |

---

|    |    |      |    |    |            |            |            |
|----|----|------|----|----|------------|------------|------------|
| 51 | No | Show | 51 | H  | 1.0176120  | 3.7220750  | -3.3362030 |
| 52 | No | Show | 52 | H  | 3.3697490  | 4.5253160  | -3.4394710 |
| 53 | No | Show | 53 | C  | 3.2072360  | -1.0659930 | -0.6795090 |
| 54 | No | Show | 54 | C  | 4.3533800  | -1.4372710 | 0.0290700  |
| 55 | No | Show | 55 | C  | 3.0072360  | -1.5598350 | -1.9757980 |
| 56 | No | Show | 56 | C  | 5.2890530  | -2.2953880 | -0.5534690 |
| 57 | No | Show | 57 | H  | 4.5241020  | -1.0661180 | 1.0353140  |
| 58 | No | Show | 58 | C  | 3.9445960  | -2.4085310 | -2.5547480 |
| 59 | No | Show | 59 | H  | 2.1103210  | -1.2934570 | -2.5289550 |
| 60 | No | Show | 60 | C  | 5.0888220  | -2.7805490 | -1.8439080 |
| 61 | No | Show | 61 | H  | 6.1742820  | -2.5831080 | 0.0081320  |
| 62 | No | Show | 62 | H  | 3.7762790  | -2.7909210 | -3.5580330 |
| 63 | No | Show | 63 | H  | 5.8168340  | -3.4503670 | -2.2943450 |
| 64 | No | Show | 64 | Br | 0.4989360  | -2.9885300 | 0.0588970  |
| 65 | No | Show | 65 | C  | -2.6676670 | 5.1405970  | 0.7502560  |
| 66 | No | Show | 66 | H  | -2.8258420 | 5.6307790  | -0.2125810 |
| 67 | No | Show | 67 | H  | -3.6363540 | 5.0519900  | 1.2481610  |
| 68 | No | Show | 68 | H  | -1.9727650 | 5.7103460  | 1.3641640  |

### 23b

| Row | Highlight |      | Display Tag |    | Symbol X   | Y          | Z          |
|-----|-----------|------|-------------|----|------------|------------|------------|
| 1   | No        | Show | 1           | C  | -3.0287820 | 0.2211460  | -0.2369800 |
| 2   | No        | Show | 2           | C  | -4.1146760 | 1.1916830  | -0.1970980 |
| 3   | No        | Show | 3           | C  | -1.7514710 | 0.6089970  | -0.5764470 |
| 4   | No        | Show | 4           | N  | -3.7501220 | 2.4645980  | -0.6473140 |
| 5   | No        | Show | 5           | C  | -1.5643620 | 1.9633110  | -0.9820460 |
| 6   | No        | Show | 6           | N  | -2.5300670 | 2.8464220  | -1.0389240 |
| 7   | No        | Show | 7           | Pd | -0.4008720 | -0.9271760 | -0.5102620 |
| 8   | No        | Show | 8           | P  | 1.3754200  | 0.4139620  | 0.1447970  |
| 9   | No        | Show | 9           | O  | -5.2712590 | 0.9814050  | 0.1811380  |
| 10  | No        | Show | 10          | H  | -0.5996900 | 2.3471580  | -1.2989950 |
| 11  | No        | Show | 11          | C  | 0.8453340  | 1.8630470  | 1.1407310  |
| 12  | No        | Show | 12          | C  | -0.1452990 | 1.6617510  | 2.1140060  |
| 13  | No        | Show | 13          | C  | 1.4011190  | 3.1383120  | 0.9867480  |
| 14  | No        | Show | 14          | C  | -0.5548370 | 2.7124980  | 2.9320970  |
| 15  | No        | Show | 15          | H  | -0.6063600 | 0.6827440  | 2.2251080  |
| 16  | No        | Show | 16          | C  | 0.9779730  | 4.1923390  | 1.7980280  |
| 17  | No        | Show | 17          | H  | 2.1524090  | 3.3232830  | 0.2249500  |
| 18  | No        | Show | 18          | C  | 0.0054550  | 3.9816430  | 2.7748150  |
| 19  | No        | Show | 19          | H  | -1.3221730 | 2.5412750  | 3.6825080  |
| 20  | No        | Show | 20          | H  | 1.4081300  | 5.1808980  | 1.6598200  |
| 21  | No        | Show | 21          | H  | -0.3231360 | 4.8048560  | 3.4038400  |
| 22  | No        | Show | 22          | C  | 2.3043150  | 1.0623170  | -1.2912370 |
| 23  | No        | Show | 23          | C  | 3.5793660  | 1.6293220  | -1.1362200 |
| 24  | No        | Show | 24          | C  | 1.7369050  | 0.9914160  | -2.5691040 |

---

|    |    |      |    |    |            |            |            |
|----|----|------|----|----|------------|------------|------------|
| 25 | No | Show | 25 | C  | 4.2592750  | 2.1381940  | -2.2407720 |
| 26 | No | Show | 26 | H  | 4.0501740  | 1.6568960  | -0.1568960 |
| 27 | No | Show | 27 | C  | 2.4192710  | 1.5042460  | -3.6724450 |
| 28 | No | Show | 28 | H  | 0.7699010  | 0.5127650  | -2.7029370 |
| 29 | No | Show | 29 | C  | 3.6782220  | 2.0814920  | -3.5095740 |
| 30 | No | Show | 30 | H  | 5.2474830  | 2.5718140  | -2.1107900 |
| 31 | No | Show | 31 | H  | 1.9710130  | 1.4382890  | -4.6601690 |
| 32 | No | Show | 32 | H  | 4.2127420  | 2.4742710  | -4.3706480 |
| 33 | No | Show | 33 | C  | 2.6653530  | -0.3667210 | 1.1881700  |
| 34 | No | Show | 34 | C  | 2.7501520  | -0.1130530 | 2.5630600  |
| 35 | No | Show | 35 | C  | 3.5822210  | -1.2477880 | 0.5935380  |
| 36 | No | Show | 36 | C  | 3.7386290  | -0.7290090 | 3.3316800  |
| 37 | No | Show | 37 | H  | 2.0587450  | 0.5725610  | 3.0427310  |
| 38 | No | Show | 38 | C  | 4.5715380  | -1.8515300 | 1.3647270  |
| 39 | No | Show | 39 | H  | 3.5190460  | -1.4713970 | -0.4660990 |
| 40 | No | Show | 40 | C  | 4.6515050  | -1.5975360 | 2.7352890  |
| 41 | No | Show | 41 | H  | 3.7944100  | -0.5223140 | 4.3973520  |
| 42 | No | Show | 42 | H  | 5.2739470  | -2.5328510 | 0.8921160  |
| 43 | No | Show | 43 | H  | 5.4216120  | -2.0759580 | 3.3350990  |
| 44 | No | Show | 44 | Br | 1.0145940  | -2.9882530 | -0.8309030 |
| 45 | No | Show | 45 | C  | -4.7903450 | 3.4850380  | -0.6919860 |
| 46 | No | Show | 46 | H  | -5.6346760 | 3.1285400  | -1.2855700 |
| 47 | No | Show | 47 | H  | -5.1515110 | 3.6998630  | 0.3167930  |
| 48 | No | Show | 48 | H  | -4.3525990 | 4.3759270  | -1.1381600 |
| 49 | No | Show | 49 | C  | -3.2581140 | -1.1954930 | 0.0886300  |
| 50 | No | Show | 50 | C  | -4.0882180 | -1.6352160 | 1.1295090  |
| 51 | No | Show | 51 | C  | -2.5249580 | -2.1565730 | -0.6452660 |
| 52 | No | Show | 52 | C  | -4.1449590 | -2.9901270 | 1.4474620  |
| 53 | No | Show | 53 | H  | -4.6800900 | -0.9122870 | 1.6798920  |
| 54 | No | Show | 54 | C  | -2.5714570 | -3.5135890 | -0.3062730 |
| 55 | No | Show | 55 | H  | -2.0760310 | -1.8691810 | -1.6086080 |
| 56 | No | Show | 56 | C  | -3.3810270 | -3.9301010 | 0.7454230  |
| 57 | No | Show | 57 | H  | -4.7881300 | -3.3194220 | 2.2600540  |
| 58 | No | Show | 58 | H  | -1.9760850 | -4.2247750 | -0.8699210 |
| 59 | No | Show | 59 | H  | -3.4284540 | -4.9819170 | 1.0140340  |

#### 24a

| Row | Highlight |      | Display Tag | Symbol | X          | Y          | Z          |
|-----|-----------|------|-------------|--------|------------|------------|------------|
| 1   | No        | Show | 1           | H      | -3.8680350 | -1.9758070 | -2.6118940 |
| 2   | No        | Show | 2           | C      | -3.8566370 | -1.0533000 | -2.0448820 |
| 3   | No        | Show | 3           | C      | -4.9816730 | -0.4235920 | -1.4368880 |
| 4   | No        | Show | 4           | C      | -2.7124260 | -0.2318600 | -1.7981920 |
| 5   | No        | Show | 5           | C      | -4.5336680 | 0.7672610  | -0.7859640 |
| 6   | No        | Show | 6           | H      | -5.9947160 | -0.8065840 | -1.4300760 |
| 7   | No        | Show | 7           | C      | -3.1264680 | 0.8947860  | -0.9997230 |

---

|    |    |      |    |    |            |            |            |
|----|----|------|----|----|------------|------------|------------|
| 8  | No | Show | 8  | Fe | -3.5876070 | -0.8729180 | -0.0248000 |
| 9  | No | Show | 9  | C  | -4.1527890 | -0.8220700 | 1.9344670  |
| 10 | No | Show | 10 | C  | -2.7324650 | -0.9140710 | 1.8460640  |
| 11 | No | Show | 11 | C  | -4.7093750 | -1.9620920 | 1.2773300  |
| 12 | No | Show | 12 | H  | -4.7114550 | -0.0079620 | 2.3798930  |
| 13 | No | Show | 13 | C  | -2.4067680 | -2.1171390 | 1.1448720  |
| 14 | No | Show | 14 | H  | -2.0293170 | -0.1731570 | 2.2062350  |
| 15 | No | Show | 15 | C  | -3.6291190 | -2.7571670 | 0.7851610  |
| 16 | No | Show | 16 | H  | -5.7646800 | -2.1661000 | 1.1426610  |
| 17 | No | Show | 17 | H  | -1.4148790 | -2.4619640 | 0.8695560  |
| 18 | No | Show | 18 | H  | -3.7213190 | -3.6739420 | 0.2158780  |
| 19 | No | Show | 19 | H  | -1.7554330 | -0.3287440 | -2.3203340 |
| 20 | No | Show | 20 | H  | -5.1488130 | 1.4236820  | -0.1827880 |
| 21 | No | Show | 21 | C  | -2.1951660 | 1.9223070  | -0.5131720 |
| 22 | No | Show | 22 | C  | -2.6648820 | 3.2472280  | -0.2605040 |
| 23 | No | Show | 23 | C  | -0.8619050 | 1.6090930  | -0.3264810 |
| 24 | No | Show | 24 | N  | -1.8968150 | 4.2200230  | 0.1477090  |
| 25 | No | Show | 25 | C  | 0.0185610  | 2.7007530  | 0.0464270  |
| 26 | No | Show | 26 | N  | -0.5980680 | 3.9338290  | 0.3023410  |
| 27 | No | Show | 27 | Pd | -0.4144910 | -0.3685090 | -0.6245140 |
| 28 | No | Show | 28 | P  | 1.8297390  | -0.2967530 | -0.0193000 |
| 29 | No | Show | 29 | C  | 2.1726990  | 0.4061160  | 1.6352940  |
| 30 | No | Show | 30 | C  | 1.3168640  | 0.0468980  | 2.6838110  |
| 31 | No | Show | 31 | C  | 3.2630910  | 1.2414210  | 1.8984210  |
| 32 | No | Show | 32 | C  | 1.5551990  | 0.5033480  | 3.9802660  |
| 33 | No | Show | 33 | H  | 0.4638020  | -0.5992170 | 2.4890410  |
| 34 | No | Show | 34 | C  | 3.4993520  | 1.6972590  | 3.1944480  |
| 35 | No | Show | 35 | H  | 3.9126800  | 1.5621790  | 1.0900850  |
| 36 | No | Show | 36 | C  | 2.6498180  | 1.3291420  | 4.2392860  |
| 37 | No | Show | 37 | H  | 0.8842550  | 0.2135980  | 4.7852010  |
| 38 | No | Show | 38 | H  | 4.3461770  | 2.3518390  | 3.3856110  |
| 39 | No | Show | 39 | H  | 2.8359900  | 1.6893300  | 5.2479650  |
| 40 | No | Show | 40 | C  | 2.9435630  | 0.4702010  | -1.2555300 |
| 41 | No | Show | 41 | C  | 4.3213870  | 0.2095710  | -1.2248210 |
| 42 | No | Show | 42 | C  | 2.4218090  | 1.2727910  | -2.2750320 |
| 43 | No | Show | 43 | C  | 5.1647320  | 0.7678540  | -2.1846950 |
| 44 | No | Show | 44 | H  | 4.7376010  | -0.4426980 | -0.4614360 |
| 45 | No | Show | 45 | C  | 3.2647790  | 1.8183570  | -3.2418950 |
| 46 | No | Show | 46 | H  | 1.3542490  | 1.4678970  | -2.3085430 |
| 47 | No | Show | 47 | C  | 4.6377100  | 1.5728190  | -3.1957610 |
| 48 | No | Show | 48 | H  | 6.2315980  | 0.5619750  | -2.1483540 |
| 49 | No | Show | 49 | H  | 2.8472300  | 2.4370180  | -4.0322940 |
| 50 | No | Show | 50 | H  | 5.2941510  | 1.9999790  | -3.9499160 |
| 51 | No | Show | 51 | C  | 2.5440190  | -1.9850930 | 0.0986990  |
| 52 | No | Show | 52 | C  | 3.0436370  | -2.5131200 | 1.2952990  |

---

|    |    |      |    |   |           |            |            |
|----|----|------|----|---|-----------|------------|------------|
| 53 | No | Show | 53 | C | 2.6053520 | -2.7623350 | -1.0689020 |
| 54 | No | Show | 54 | C | 3.6100230 | -3.7890740 | 1.3230090  |
| 55 | No | Show | 55 | H | 3.0107890 | -1.9307780 | 2.2107750  |
| 56 | No | Show | 56 | C | 3.1795600 | -4.0298520 | -1.0386970 |
| 57 | No | Show | 57 | H | 2.1972050 | -2.3773610 | -1.9967520 |

## 24b

| Row | Highlight |      | Display Tag |    | Symbol     | X          | Y          | Z |
|-----|-----------|------|-------------|----|------------|------------|------------|---|
| 1   | No        | Show | 1           | C  | -3.1128140 | 0.5653830  | -0.1137410 |   |
| 2   | No        | Show | 2           | C  | -3.9893230 | 1.6467460  | 0.2032210  |   |
| 3   | No        | Show | 3           | C  | -1.8077450 | 0.8179700  | -0.4747160 |   |
| 4   | No        | Show | 4           | N  | -3.6264160 | 2.9000750  | 0.1496900  |   |
| 5   | No        | Show | 5           | C  | -1.4025250 | 2.2067370  | -0.6072480 |   |
| 6   | No        | Show | 6           | N  | -2.3687940 | 3.1531250  | -0.2395760 |   |
| 7   | No        | Show | 7           | Pd | -0.7046190 | -0.8410330 | -0.8940980 |   |
| 8   | No        | Show | 8           | P  | 1.2728370  | -0.1415910 | 0.0532060  |   |
| 9   | No        | Show | 9           | C  | 1.1418690  | 1.1938670  | 1.2956400  |   |
| 10  | No        | Show | 10          | C  | 0.1143870  | 1.1194080  | 2.2457430  |   |
| 11  | No        | Show | 11          | C  | 2.0481790  | 2.2581450  | 1.3447530  |   |
| 12  | No        | Show | 12          | C  | 0.0056430  | 2.0879550  | 3.2422920  |   |
| 13  | No        | Show | 13          | H  | -0.6050200 | 0.3048230  | 2.2032380  |   |
| 14  | No        | Show | 14          | C  | 1.9333000  | 3.2291480  | 2.3400330  |   |
| 15  | No        | Show | 15          | H  | 2.8327950  | 2.3414590  | 0.5984760  |   |
| 16  | No        | Show | 16          | C  | 0.9160550  | 3.1456240  | 3.2914790  |   |
| 17  | No        | Show | 17          | H  | -0.7951260 | 2.0204120  | 3.9743790  |   |
| 18  | No        | Show | 18          | H  | 2.6379940  | 4.0565350  | 2.3658430  |   |
| 19  | No        | Show | 19          | H  | 0.8281620  | 3.9053150  | 4.0642050  |   |
| 20  | No        | Show | 20          | C  | 2.5040270  | 0.3939770  | -1.1879450 |   |
| 21  | No        | Show | 21          | C  | 3.8744830  | 0.1687840  | -0.9925820 |   |
| 22  | No        | Show | 22          | C  | 2.0697510  | 1.0459450  | -2.3488280 |   |
| 23  | No        | Show | 23          | C  | 4.7973190  | 0.5955940  | -1.9469740 |   |
| 24  | No        | Show | 24          | H  | 4.2256130  | -0.3444280 | -0.1017540 |   |
| 25  | No        | Show | 25          | C  | 2.9971480  | 1.4699290  | -3.2989740 |   |
| 26  | No        | Show | 26          | H  | 1.0117250  | 1.2431740  | -2.4876400 |   |
| 27  | No        | Show | 27          | C  | 4.3603480  | 1.2448030  | -3.1024930 |   |
| 28  | No        | Show | 28          | H  | 5.8573560  | 0.4144130  | -1.7878640 |   |
| 29  | No        | Show | 29          | H  | 2.6508220  | 1.9759080  | -4.1964300 |   |
| 30  | No        | Show | 30          | H  | 5.0805570  | 1.5714090  | -3.8486490 |   |
| 31  | No        | Show | 31          | C  | 2.1301700  | -1.4884080 | 0.9662800  |   |
| 32  | No        | Show | 32          | C  | 2.4700300  | -1.3692970 | 2.3203880  |   |
| 33  | No        | Show | 33          | C  | 2.4826690  | -2.6557870 | 0.2675040  |   |
| 34  | No        | Show | 34          | C  | 3.1499590  | -2.4023420 | 2.9692870  |   |
| 35  | No        | Show | 35          | H  | 2.2176420  | -0.4708750 | 2.8750640  |   |
| 36  | No        | Show | 36          | C  | 3.1678600  | -3.6778090 | 0.9209830  |   |
| 37  | No        | Show | 37          | H  | 2.1896600  | -2.7567700 | -0.7751520 |   |

---

|    |    |      |    |   |            |            |            |
|----|----|------|----|---|------------|------------|------------|
| 38 | No | Show | 38 | C | 3.5013130  | -3.5573420 | 2.2724640  |
| 39 | No | Show | 39 | H | 3.4080360  | -2.2963990 | 4.0200780  |
| 40 | No | Show | 40 | H | 3.4379140  | -4.5760280 | 0.3708560  |
| 41 | No | Show | 41 | H | 4.0332970  | -4.3593660 | 2.7784360  |
| 42 | No | Show | 42 | O | 0.1537270  | -2.5597220 | -1.5787180 |
| 43 | No | Show | 43 | H | -0.0748230 | -3.2658510 | -0.9531040 |
| 44 | No | Show | 44 | C | -3.5616020 | -0.8446220 | -0.0816420 |
| 45 | No | Show | 45 | C | -4.3308250 | -1.3804050 | 0.9602150  |
| 46 | No | Show | 46 | C | -3.1356850 | -1.7051330 | -1.1138330 |
| 47 | No | Show | 47 | C | -4.6432670 | -2.7389050 | 0.9802780  |
| 48 | No | Show | 48 | H | -4.6582800 | -0.7386390 | 1.7745880  |
| 49 | No | Show | 49 | C | -3.4309650 | -3.0701620 | -1.0807390 |
| 50 | No | Show | 50 | H | -2.6798820 | -1.2819750 | -2.0166190 |
| 51 | No | Show | 51 | C | -4.1872970 | -3.5894070 | -0.0318480 |
| 52 | No | Show | 52 | H | -5.2342370 | -3.1415340 | 1.7992090  |
| 53 | No | Show | 53 | H | -3.0782630 | -3.7130310 | -1.8820240 |
| 54 | No | Show | 54 | H | -4.4277120 | -4.6488160 | -0.0025640 |
| 55 | No | Show | 55 | O | -0.3033810 | 2.6069880  | -1.0159100 |
| 56 | No | Show | 56 | H | -5.0231170 | 1.4785090  | 0.4959520  |
| 57 | No | Show | 57 | C | -2.0001190 | 4.5606550  | -0.3245420 |

## 25a

| Row | Highlight |      | Display Tag |    | Symbol X   | Y          | Z          |
|-----|-----------|------|-------------|----|------------|------------|------------|
| 1   | No        | Show | 1           | H  | 1.0173060  | -3.0861800 | -3.3227310 |
| 2   | No        | Show | 2           | C  | 0.7458230  | -3.1200190 | -2.2747850 |
| 3   | No        | Show | 3           | C  | 0.1955820  | -4.2413070 | -1.5831520 |
| 4   | No        | Show | 4           | C  | 0.9251530  | -2.0654640 | -1.3324090 |
| 5   | No        | Show | 5           | C  | 0.0464180  | -3.8816330 | -0.2115680 |
| 6   | No        | Show | 6           | H  | -0.0294950 | -5.2094590 | -2.0136870 |
| 7   | No        | Show | 7           | C  | 0.4842680  | -2.5227250 | -0.0463290 |
| 8   | No        | Show | 8           | Fe | 1.9933650  | -3.7220810 | -0.7757070 |
| 9   | No        | Show | 9           | C  | 3.0722840  | -5.0032230 | 0.3931310  |
| 10  | No        | Show | 10          | C  | 3.5688550  | -3.6703010 | 0.5266570  |
| 11  | No        | Show | 11          | C  | 3.1719940  | -5.3747670 | -0.9828530 |
| 12  | No        | Show | 12          | H  | 2.6636030  | -5.6142520 | 1.1887140  |
| 13  | No        | Show | 13          | C  | 3.9746320  | -3.2174660 | -0.7665920 |
| 14  | No        | Show | 14          | H  | 3.5853830  | -3.0929780 | 1.4426810  |
| 15  | No        | Show | 15          | C  | 3.7287420  | -4.2713740 | -1.6994130 |
| 16  | No        | Show | 16          | H  | 2.8440870  | -6.3126940 | -1.4139500 |
| 17  | No        | Show | 17          | H  | 4.3664230  | -2.2372750 | -1.0086470 |
| 18  | No        | Show | 18          | H  | 3.8969390  | -4.2263160 | -2.7683830 |
| 19  | No        | Show | 19          | H  | 1.3585380  | -1.0966970 | -1.5483680 |
| 20  | No        | Show | 20          | H  | -0.3409750 | -4.5220730 | 0.5712970  |
| 21  | No        | Show | 21          | C  | 0.4524650  | -1.7632190 | 1.2174300  |
| 22  | No        | Show | 22          | C  | 0.6821930  | -2.4759790 | 2.4420880  |

---

|    |    |      |    |    |            |            |            |
|----|----|------|----|----|------------|------------|------------|
| 23 | No | Show | 23 | C  | 0.1786700  | -0.4189340 | 1.3078320  |
| 24 | No | Show | 24 | N  | 0.6621790  | -1.9387220 | 3.6290030  |
| 25 | No | Show | 25 | C  | 0.1824710  | 0.2210840  | 2.6112930  |
| 26 | No | Show | 26 | N  | 0.4183170  | -0.6223790 | 3.6971000  |
| 27 | No | Show | 27 | Pd | -0.4467030 | 0.7038250  | -0.2292220 |
| 28 | No | Show | 28 | P  | 1.4971770  | 1.9844640  | -0.1572750 |
| 29 | No | Show | 29 | C  | 2.8254670  | 1.6457260  | 1.0546030  |
| 30 | No | Show | 30 | C  | 3.3771290  | 0.3581230  | 1.1375670  |
| 31 | No | Show | 31 | C  | 3.3052170  | 2.6499800  | 1.9038710  |
| 32 | No | Show | 32 | C  | 4.4098470  | 0.0920160  | 2.0353440  |
| 33 | No | Show | 33 | H  | 3.0001660  | -0.4420330 | 0.5056390  |
| 34 | No | Show | 34 | C  | 4.3317350  | 2.3762960  | 2.8081490  |
| 35 | No | Show | 35 | H  | 2.8724950  | 3.6449710  | 1.8712070  |
| 36 | No | Show | 36 | C  | 4.8901210  | 1.1003020  | 2.8729490  |
| 37 | No | Show | 37 | H  | 4.8359670  | -0.9063560 | 2.0862710  |
| 38 | No | Show | 38 | H  | 4.6914250  | 3.1646360  | 3.4644190  |
| 39 | No | Show | 39 | H  | 5.6910080  | 0.8888400  | 3.5769170  |
| 40 | No | Show | 40 | C  | 1.0195970  | 3.7312500  | 0.1011900  |
| 41 | No | Show | 41 | C  | 1.7569010  | 4.7752880  | -0.4778920 |
| 42 | No | Show | 42 | C  | -0.0907580 | 4.0267080  | 0.9019830  |
| 43 | No | Show | 43 | C  | 1.3867240  | 6.1003000  | -0.2544460 |
| 44 | No | Show | 44 | H  | 2.6167590  | 4.5583580  | -1.1061090 |
| 45 | No | Show | 45 | C  | -0.4552860 | 5.3549370  | 1.1201520  |
| 46 | No | Show | 46 | H  | -0.6508360 | 3.2215680  | 1.3672590  |
| 47 | No | Show | 47 | C  | 0.2781670  | 6.3916550  | 0.5433000  |
| 48 | No | Show | 48 | H  | 1.9617850  | 6.9034430  | -0.7084200 |
| 49 | No | Show | 49 | H  | -1.3215730 | 5.5753330  | 1.7381270  |
| 50 | No | Show | 50 | H  | -0.0143760 | 7.4254190  | 0.7102020  |
| 51 | No | Show | 51 | C  | 2.3450830  | 2.0062000  | -1.7891730 |
| 52 | No | Show | 52 | C  | 3.6670110  | 1.5811820  | -1.9703140 |
| 53 | No | Show | 53 | C  | 1.6151040  | 2.4628860  | -2.9002800 |
| 54 | No | Show | 54 | C  | 4.2457750  | 1.6002090  | -3.2413210 |
| 55 | No | Show | 55 | H  | 4.2587020  | 1.2519130  | -1.1216350 |
| 56 | No | Show | 56 | C  | 2.1993620  | 2.4839720  | -4.1642940 |
| 57 | No | Show | 57 | H  | 0.5978560  | 2.8210270  | -2.7666160 |
| 58 | No | Show | 58 | C  | 3.5145850  | 2.0469690  | -4.3407300 |
| 59 | No | Show | 59 | H  | 5.2749350  | 1.2727800  | -3.3660920 |
| 60 | No | Show | 60 | H  | 1.6247970  | 2.8452400  | -5.0134710 |
| 61 | No | Show | 61 | H  | 3.9680830  | 2.0629390  | -5.3284960 |
| 62 | No | Show | 62 | O  | -0.0075590 | 1.4298540  | 2.8185560  |
| 63 | No | Show | 63 | H  | 0.9024300  | -3.5400210 | 2.4257220  |
| 64 | No | Show | 64 | C  | 0.4116320  | -0.0352640 | 5.0303630  |
| 65 | No | Show | 65 | H  | 1.1902760  | 0.7270930  | 5.1079760  |
| 66 | No | Show | 66 | H  | -0.5515240 | 0.4424600  | 5.2239300  |
| 67 | No | Show | 67 | H  | 0.5904920  | -0.8401910 | 5.7411520  |

---

|    |    |      |    |    |            |            |            |
|----|----|------|----|----|------------|------------|------------|
| 68 | No | Show | 68 | H  | -6.1306960 | -3.0199820 | -0.1542300 |
| 69 | No | Show | 69 | C  | -6.1660850 | -1.9372950 | -0.1465810 |
| 70 | No | Show | 70 | C  | -6.3408670 | -1.1103860 | 1.0060060  |
| 71 | No | Show | 71 | C  | -5.9915930 | -1.0826790 | -1.2791970 |
| 72 | No | Show | 72 | C  | -6.2699240 | 0.2537230  | 0.5860700  |
| 73 | No | Show | 73 | H  | -6.4584090 | -1.4586420 | 2.0250550  |
| 74 | No | Show | 74 | C  | -6.0555940 | 0.2708150  | -0.8236500 |
| 75 | No | Show | 75 | Fe | -4.5427670 | -0.7320840 | 0.1270100  |
| 76 | No | Show | 76 | C  | -3.0485960 | 0.3279950  | 1.0082150  |
| 77 | No | Show | 77 | C  | -2.7528960 | 0.1749150  | -0.4092760 |
| 78 | No | Show | 78 | C  | -3.1722100 | -0.9582780 | 1.6106800  |
| 79 | No | Show | 79 | H  | -3.1984250 | 1.2809870  | 1.4994490  |
| 80 | No | Show | 80 | C  | -2.7254890 | -1.2618800 | -0.6345330 |
| 81 | No | Show | 81 | C  | -2.9709450 | -1.9423560 | 0.5929590  |
| 82 | No | Show | 82 | H  | -3.4126450 | -1.1568240 | 2.6485440  |
| 83 | No | Show | 83 | H  | -2.5701580 | -1.7319990 | -1.5982280 |
| 84 | No | Show | 84 | H  | -3.0360310 | -3.0157510 | 0.7250030  |
| 85 | No | Show | 85 | H  | -5.8140840 | -1.4127330 | -2.2961340 |
| 86 | No | Show | 86 | H  | -6.3127430 | 1.1247830  | 1.2277400  |
| 87 | No | Show | 87 | H  | -5.8866100 | 1.1653740  | -1.4096900 |
| 88 | No | Show | 88 | O  | -3.2202900 | 0.8592410  | -2.8738690 |
| 89 | No | Show | 89 | H  | -4.0633750 | 0.3999270  | -2.7750970 |
| 90 | No | Show | 90 | O  | -3.4978720 | 2.4860990  | -1.0258520 |
| 91 | No | Show | 91 | H  | -3.4436620 | 3.1996330  | -1.6773070 |
| 92 | No | Show | 92 | B  | -2.7910290 | 1.3539100  | -1.5672950 |
| 93 | No | Show | 93 | O  | -1.3211190 | 1.7747150  | -1.8722080 |
| 94 | No | Show | 94 | H  | -1.1249310 | 1.3021170  | -2.6980290 |

## 25b

| Row | Highlight | Display | Tag | Symbol | X          | Y          | Z          |
|-----|-----------|---------|-----|--------|------------|------------|------------|
| 1   | No        | Show    | 1   | C      | 2.3659240  | -1.3937230 | -0.2198780 |
| 2   | No        | Show    | 2   | C      | 3.0015140  | -2.3543870 | -1.0796460 |
| 3   | No        | Show    | 3   | C      | 1.3561470  | -0.6332360 | -0.7639580 |
| 4   | No        | Show    | 4   | N      | 2.7075950  | -2.5422760 | -2.3352150 |
| 5   | No        | Show    | 5   | C      | 0.9778290  | -0.8420270 | -2.1539320 |
| 6   | No        | Show    | 6   | N      | 1.7341580  | -1.7831390 | -2.8517530 |
| 7   | No        | Show    | 7   | Pd     | 0.3868400  | 0.8837490  | 0.1202870  |
| 8   | No        | Show    | 8   | P      | -1.5901960 | -0.3920390 | 0.1882850  |
| 9   | No        | Show    | 9   | C      | -1.6275380 | -2.0993570 | -0.4693920 |
| 10  | No        | Show    | 10  | C      | -0.7393770 | -3.0588040 | 0.0414340  |
| 11  | No        | Show    | 11  | C      | -2.5063470 | -2.4644930 | -1.4963610 |
| 12  | No        | Show    | 12  | C      | -0.7491310 | -4.3633330 | -0.4482970 |
| 13  | No        | Show    | 13  | H      | -0.0331570 | -2.7937470 | 0.8232170  |
| 14  | No        | Show    | 14  | C      | -2.5092350 | -3.7702910 | -1.9885640 |
| 15  | No        | Show    | 15  | H      | -3.1819590 | -1.7300300 | -1.9234900 |



---

|    |    |      |    |   |            |            |            |
|----|----|------|----|---|------------|------------|------------|
| 16 | No | Show | 16 | C | -1.6354910 | -4.7228920 | -1.4652170 |
| 17 | No | Show | 17 | H | -0.0554930 | -5.0942730 | -0.0410950 |
| 18 | No | Show | 18 | H | -3.1957030 | -4.0389090 | -2.7874720 |
| 19 | No | Show | 19 | H | -1.6387420 | -5.7387200 | -1.8521930 |
| 20 | No | Show | 20 | C | -2.9094430 | 0.5166080  | -0.6906430 |
| 21 | No | Show | 21 | C | -4.2542870 | 0.3629070  | -0.3184260 |
| 22 | No | Show | 22 | C | -2.5725030 | 1.3663720  | -1.7501630 |
| 23 | No | Show | 23 | C | -5.2516300 | 1.0475920  | -1.0091540 |
| 24 | No | Show | 24 | H | -4.5245110 | -0.2859290 | 0.5107510  |
| 25 | No | Show | 25 | C | -3.5769580 | 2.0514680  | -2.4343540 |
| 26 | No | Show | 26 | H | -1.5347340 | 1.4854160  | -2.0420040 |
| 27 | No | Show | 27 | C | -4.9131860 | 1.8935790  | -2.0685320 |
| 28 | No | Show | 28 | H | -6.2912960 | 0.9249000  | -0.7160800 |
| 29 | No | Show | 29 | H | -3.3059490 | 2.7155070  | -3.2505730 |
| 30 | No | Show | 30 | H | -5.6921170 | 2.4329720  | -2.6020650 |
| 31 | No | Show | 31 | C | -2.2370020 | -0.5231410 | 1.9045560  |
| 32 | No | Show | 32 | C | -2.4866280 | -1.7417540 | 2.5474600  |
| 33 | No | Show | 33 | C | -2.4867150 | 0.6774320  | 2.5915490  |
| 34 | No | Show | 34 | C | -2.9671560 | -1.7607360 | 3.8588650  |
| 35 | No | Show | 35 | H | -2.3264350 | -2.6813910 | 2.0276310  |
| 36 | No | Show | 36 | C | -2.9715750 | 0.6518220  | 3.8965960  |
| 37 | No | Show | 37 | H | -2.3188250 | 1.6273030  | 2.0907210  |
| 38 | No | Show | 38 | C | -3.2076600 | -0.5671970 | 4.5375420  |
| 39 | No | Show | 39 | H | -3.1600850 | -2.7141380 | 4.3442890  |
| 40 | No | Show | 40 | H | -3.1681590 | 1.5877780  | 4.4135540  |
| 41 | No | Show | 41 | H | -3.5839480 | -0.5846880 | 5.5572220  |
| 42 | No | Show | 42 | O | 0.0548110  | -0.2580570 | -2.7410840 |
| 43 | No | Show | 43 | H | 3.7745480  | -3.0146600 | -0.6962290 |
| 44 | No | Show | 44 | C | 1.4091950  | -2.0132880 | -4.2531910 |
| 45 | No | Show | 45 | H | 0.3885870  | -2.3926070 | -4.3439080 |
| 46 | No | Show | 46 | H | 1.4736610  | -1.0749400 | -4.8080190 |
| 47 | No | Show | 47 | H | 2.1233760  | -2.7390930 | -4.6381320 |
| 48 | No | Show | 48 | O | 0.6095180  | 4.6749850  | 1.1096700  |
| 49 | No | Show | 49 | H | 1.1068150  | 5.3910740  | 0.6942550  |
| 50 | No | Show | 50 | O | -0.4741410 | 4.1154440  | -1.0318890 |
| 51 | No | Show | 51 | H | -1.2388130 | 4.6072190  | -0.7013370 |
| 52 | No | Show | 52 | B | 0.2827720  | 3.6670710  | 0.1055840  |
| 53 | No | Show | 53 | O | -0.5532810 | 2.6477320  | 0.9341570  |
| 54 | No | Show | 54 | H | -0.2985030 | 2.8147460  | 1.8558550  |
| 55 | No | Show | 55 | C | 2.8441450  | -1.3098980 | 1.1839840  |
| 56 | No | Show | 56 | C | 1.9690050  | -1.0666210 | 2.2539930  |
| 57 | No | Show | 57 | C | 4.2057160  | -1.4955640 | 1.4794680  |
| 58 | No | Show | 58 | C | 2.4336340  | -1.0121250 | 3.5668200  |
| 59 | No | Show | 59 | H | 0.9088280  | -0.9242440 | 2.0631110  |
| 60 | No | Show | 60 | C | 4.6737280  | -1.4354740 | 2.7907660  |

---

|    |    |      |    |   |           |            |            |
|----|----|------|----|---|-----------|------------|------------|
| 61 | No | Show | 61 | H | 4.9163890 | -1.6547700 | 0.6727540  |
| 62 | No | Show | 62 | C | 3.7888790 | -1.1958110 | 3.8432520  |
| 63 | No | Show | 63 | H | 1.7310850 | -0.8269820 | 4.3754710  |
| 64 | No | Show | 64 | H | 5.7342110 | -1.5694190 | 2.9892690  |
| 65 | No | Show | 65 | H | 4.1522780 | -1.1499860 | 4.8665990  |
| 66 | No | Show | 66 | C | 1.6051270 | 2.8407180  | -0.4420240 |
| 67 | No | Show | 67 | C | 2.5564770 | 2.3258030  | 0.4745260  |
| 68 | No | Show | 68 | C | 1.9287930 | 2.7405430  | -1.8192020 |
| 69 | No | Show | 69 | C | 3.7872730 | 1.8020200  | 0.0467860  |
| 70 | No | Show | 70 | H | 2.3806300 | 2.4450810  | 1.5429230  |
| 71 | No | Show | 71 | C | 3.1450100 | 2.2214110  | -2.2451840 |
| 72 | No | Show | 72 | H | 1.2088840 | 3.1160790  | -2.5409800 |
| 73 | No | Show | 73 | C | 4.0837020 | 1.7586200  | -1.3099500 |
| 74 | No | Show | 74 | H | 4.5081580 | 1.4478790  | 0.7788680  |
| 75 | No | Show | 75 | H | 3.3761570 | 2.1793630  | -3.3075130 |
| 76 | No | Show | 76 | H | 5.0403260 | 1.3665840  | -1.6480490 |

## 26a

| Row | Highlight |      | Display Tag |    | Symbol X  | Y          | Z          |
|-----|-----------|------|-------------|----|-----------|------------|------------|
| 1   | No        | Show | 1           | H  | 2.1357240 | -1.5644780 | -3.7419360 |
| 2   | No        | Show | 2           | C  | 2.1368170 | -1.9289550 | -2.7216590 |
| 3   | No        | Show | 3           | C  | 2.6493430 | -3.1856340 | -2.2760690 |
| 4   | No        | Show | 4           | C  | 1.6850590 | -1.2124010 | -1.5761090 |
| 5   | No        | Show | 5           | C  | 2.5267250 | -3.2387420 | -0.8578740 |
| 6   | No        | Show | 6           | H  | 3.1031720 | -3.9464680 | -2.8998460 |
| 7   | No        | Show | 7           | C  | 1.9063460 | -2.0201590 | -0.4092930 |
| 8   | No        | Show | 8           | Fe | 3.6687720 | -1.6457290 | -1.4072750 |
| 9   | No        | Show | 9           | C  | 5.5028480 | -1.9461920 | -0.5685570 |
| 10  | No        | Show | 10          | C  | 4.9356030 | -0.7216810 | -0.1029610 |
| 11  | No        | Show | 11          | C  | 5.6107050 | -1.8662940 | -1.9910130 |
| 12  | No        | Show | 12          | H  | 5.7398650 | -2.8025340 | 0.0493350  |
| 13  | No        | Show | 13          | C  | 4.6878180 | 0.1158550  | -1.2348900 |
| 14  | No        | Show | 14          | H  | 4.6862340 | -0.5050170 | 0.9277440  |
| 15  | No        | Show | 15          | C  | 5.1049620 | -0.5943340 | -2.4037830 |
| 16  | No        | Show | 16          | H  | 5.9673600 | -2.6509080 | -2.6473360 |
| 17  | No        | Show | 17          | H  | 4.2278090 | 1.0967640  | -1.2210320 |
| 18  | No        | Show | 18          | H  | 5.0145860 | -0.2462060 | -3.4256360 |
| 19  | No        | Show | 19          | H  | 1.2840910 | -0.2078830 | -1.5778500 |
| 20  | No        | Show | 20          | H  | 2.8702720 | -4.0328360 | -0.2112260 |
| 21  | No        | Show | 21          | C  | 1.5293870 | -1.6815050 | 0.9705820  |
| 22  | No        | Show | 22          | C  | 2.3184800 | -2.2766120 | 2.0553720  |
| 23  | No        | Show | 23          | C  | 0.4423970 | -0.8970620 | 1.3017950  |
| 24  | No        | Show | 24          | N  | 1.8892140 | -1.9708240 | 3.3481970  |
| 25  | No        | Show | 25          | C  | 0.1575030 | -0.6930720 | 2.6874210  |
| 26  | No        | Show | 26          | N  | 0.8382350 | -1.2112380 | 3.6772860  |

---

|    |    |      |    |    |            |            |            |
|----|----|------|----|----|------------|------------|------------|
| 27 | No | Show | 27 | Pd | -0.8962720 | -0.0232200 | 0.0642470  |
| 28 | No | Show | 28 | P  | -0.0082810 | 2.2541270  | 0.3049560  |
| 29 | No | Show | 29 | C  | 1.0033890  | 2.6261820  | 1.7871280  |
| 30 | No | Show | 30 | C  | 2.2183600  | 1.9399990  | 1.9441480  |
| 31 | No | Show | 31 | C  | 0.5992000  | 3.5327990  | 2.7740990  |
| 32 | No | Show | 32 | C  | 3.0181670  | 2.1727860  | 3.0600360  |
| 33 | No | Show | 33 | H  | 2.5405070  | 1.2234900  | 1.1929340  |
| 34 | No | Show | 34 | C  | 1.3983620  | 3.7529910  | 3.8979050  |
| 35 | No | Show | 35 | H  | -0.3362720 | 4.0753640  | 2.6715100  |
| 36 | No | Show | 36 | C  | 2.6090670  | 3.0773430  | 4.0422320  |
| 37 | No | Show | 37 | H  | 3.9579270  | 1.6375400  | 3.1673720  |
| 38 | No | Show | 38 | H  | 1.0720750  | 4.4583020  | 4.6581040  |
| 39 | No | Show | 39 | H  | 3.2302090  | 3.2505610  | 4.9172320  |
| 40 | No | Show | 40 | C  | -1.3829100 | 3.4751340  | 0.4026420  |
| 41 | No | Show | 41 | C  | -1.3146900 | 4.7602000  | -0.1576250 |
| 42 | No | Show | 42 | C  | -2.5502290 | 3.0928400  | 1.0851430  |
| 43 | No | Show | 43 | C  | -2.3891800 | 5.6428070  | -0.0326400 |
| 44 | No | Show | 44 | H  | -0.4255100 | 5.0711310  | -0.6993030 |
| 45 | No | Show | 45 | C  | -3.6160860 | 3.9814000  | 1.2199970  |
| 46 | No | Show | 46 | H  | -2.6233870 | 2.0914960  | 1.5035280  |
| 47 | No | Show | 47 | C  | -3.5380340 | 5.2578670  | 0.6595620  |
| 48 | No | Show | 48 | H  | -2.3262340 | 6.6319540  | -0.4787810 |
| 49 | No | Show | 49 | H  | -4.5120130 | 3.6717010  | 1.7516970  |
| 50 | No | Show | 50 | H  | -4.3733700 | 5.9466690  | 0.7542330  |
| 51 | No | Show | 51 | C  | 1.0195400  | 2.8838080  | -1.0830630 |
| 52 | No | Show | 52 | C  | 2.0679430  | 3.7974520  | -0.9027320 |
| 53 | No | Show | 53 | C  | 0.7190320  | 2.4421520  | -2.3794730 |
| 54 | No | Show | 54 | C  | 2.7965010  | 4.2596520  | -1.9990590 |
| 55 | No | Show | 55 | H  | 2.3219260  | 4.1451030  | 0.0949210  |
| 56 | No | Show | 56 | C  | 1.4404570  | 2.9141910  | -3.4751950 |
| 57 | No | Show | 57 | H  | -0.0805280 | 1.7223710  | -2.5373710 |
| 58 | No | Show | 58 | C  | 2.4829160  | 3.8223680  | -3.2869710 |
| 59 | No | Show | 59 | H  | 3.6115500  | 4.9622580  | -1.8446850 |
| 60 | No | Show | 60 | H  | 1.1933960  | 2.5628880  | -4.4735540 |
| 61 | No | Show | 61 | H  | 3.0535300  | 4.1827020  | -4.1390430 |
| 62 | No | Show | 62 | H  | -5.8678170 | -3.5596420 | -1.3676280 |
| 63 | No | Show | 63 | C  | -5.5638880 | -2.9044930 | -0.5605250 |
| 64 | No | Show | 64 | C  | -5.3491540 | -3.2876540 | 0.7986760  |
| 65 | No | Show | 65 | C  | -5.2653350 | -1.5132530 | -0.6808340 |
| 66 | No | Show | 66 | C  | -4.9110300 | -2.1354150 | 1.5210780  |
| 67 | No | Show | 67 | H  | -5.4579830 | -4.2868320 | 1.2022780  |
| 68 | No | Show | 68 | C  | -4.8635830 | -1.0374900 | 0.6107210  |
| 69 | No | Show | 69 | Fe | -3.6267050 | -2.5598990 | -0.0101540 |
| 70 | No | Show | 70 | C  | -1.8311000 | -2.9735010 | 0.8759100  |
| 71 | No | Show | 71 | C  | -1.6295040 | -1.9414240 | -0.0939460 |

---

|    |    |      |    |   |            |            |            |
|----|----|------|----|---|------------|------------|------------|
| 72 | No | Show | 72 | C | -2.3655430 | -4.1333070 | 0.2337660  |
| 73 | No | Show | 73 | H | -1.6384810 | -2.8856070 | 1.9383130  |
| 74 | No | Show | 74 | C | -2.0694550 | -2.4884220 | -1.3520420 |
| 75 | No | Show | 75 | C | -2.5172360 | -3.8308530 | -1.1521830 |
| 76 | No | Show | 76 | H | -2.6469950 | -5.0610990 | 0.7185020  |
| 77 | No | Show | 77 | H | -2.0571550 | -1.9829820 | -2.3115560 |
| 78 | No | Show | 78 | H | -2.9284100 | -4.4877720 | -1.9100820 |
| 79 | No | Show | 79 | H | -5.3402790 | -0.9295550 | -1.5913490 |
| 80 | No | Show | 80 | H | -4.6260120 | -2.1095460 | 2.5657440  |
| 81 | No | Show | 81 | H | -4.5540680 | -0.0280070 | 0.8514070  |
| 82 | No | Show | 82 | O | -4.0450990 | 0.6533290  | -3.2401740 |
| 83 | No | Show | 83 | H | -4.3279130 | 1.2713450  | -3.9285390 |
| 84 | No | Show | 84 | O | -2.8684430 | 2.5897490  | -2.5429010 |
| 85 | No | Show | 85 | H | -2.3938190 | 2.9712560  | -1.7878750 |
| 86 | No | Show | 86 | B | -3.2216970 | 1.2842140  | -2.3426340 |
| 87 | No | Show | 87 | O | -2.7653200 | 0.5725540  | -1.2471220 |
| 88 | No | Show | 88 | H | -3.1819730 | -0.3169000 | -1.1701700 |
| 89 | No | Show | 89 | H | -0.6856830 | -0.0861600 | 3.0044960  |
| 90 | No | Show | 90 | O | 3.3040520  | -3.0135240 | 1.9220750  |
| 91 | No | Show | 91 | C | 2.6268660  | -2.5602810 | 4.4577030  |
| 92 | No | Show | 92 | H | 2.1733650  | -2.1944510 | 5.3772310  |
| 93 | No | Show | 93 | H | 2.5737130  | -3.6508270 | 4.4111780  |
| 94 | No | Show | 94 | H | 3.6794050  | -2.2727110 | 4.4057220  |

## 26b

| Row | Highlight |      | Display Tag |    | Symbol X   | Y          | Z          |
|-----|-----------|------|-------------|----|------------|------------|------------|
| 1   | No        | Show | 1           | C  | 2.5043540  | -0.7719030 | -0.0155690 |
| 2   | No        | Show | 2           | C  | 3.4681450  | -1.5839980 | -0.7709820 |
| 3   | No        | Show | 3           | C  | 1.4441170  | -0.2227260 | -0.7026290 |
| 4   | No        | Show | 4           | N  | 3.2216190  | -1.6821540 | -2.1428400 |
| 5   | No        | Show | 5           | C  | 1.3433200  | -0.4385950 | -2.1090310 |
| 6   | No        | Show | 6           | N  | 2.2026850  | -1.1330090 | -2.8079230 |
| 7   | No        | Show | 7           | Pd | 0.0751260  | 1.0136240  | 0.0940580  |
| 8   | No        | Show | 8           | P  | -1.5603800 | -0.6995650 | 0.0115650  |
| 9   | No        | Show | 9           | C  | -1.1130550 | -2.3206230 | -0.7107890 |
| 10  | No        | Show | 10          | C  | -0.0970300 | -3.0838310 | -0.1114990 |
| 11  | No        | Show | 11          | C  | -1.7141570 | -2.7935840 | -1.8846710 |
| 12  | No        | Show | 12          | C  | 0.2847340  | -4.3062130 | -0.6585170 |
| 13  | No        | Show | 13          | H  | 0.4075560  | -2.7278930 | 0.7823140  |
| 14  | No        | Show | 14          | C  | -1.3209370 | -4.0143310 | -2.4354430 |
| 15  | No        | Show | 15          | H  | -2.4867480 | -2.2118120 | -2.3782920 |
| 16  | No        | Show | 16          | C  | -0.3267140 | -4.7753060 | -1.8230020 |
| 17  | No        | Show | 17          | H  | 1.0706470  | -4.8838890 | -0.1792480 |
| 18  | No        | Show | 18          | H  | -1.7945060 | -4.3659260 | -3.3483980 |
| 19  | No        | Show | 19          | H  | -0.0222750 | -5.7254050 | -2.2543830 |

---

|    |    |      |    |   |            |            |            |
|----|----|------|----|---|------------|------------|------------|
| 20 | No | Show | 20 | C | -3.0205020 | -0.1349340 | -0.9337890 |
| 21 | No | Show | 21 | C | -4.2460140 | -0.8086160 | -0.8020010 |
| 22 | No | Show | 22 | C | -2.9243930 | 0.9627460  | -1.7951770 |
| 23 | No | Show | 23 | C | -5.3515310 | -0.4012280 | -1.5434930 |
| 24 | No | Show | 24 | H | -4.3382630 | -1.6479310 | -0.1170450 |
| 25 | No | Show | 25 | C | -4.0372410 | 1.3678010  | -2.5351970 |
| 26 | No | Show | 26 | H | -2.0063200 | 1.5388940  | -1.8662010 |
| 27 | No | Show | 27 | C | -5.2468570 | 0.6860910  | -2.4159710 |
| 28 | No | Show | 28 | H | -6.2964500 | -0.9276860 | -1.4354990 |
| 29 | No | Show | 29 | H | -3.9524910 | 2.2297980  | -3.1911520 |
| 30 | No | Show | 30 | H | -6.1126430 | 1.0069250  | -2.9899640 |
| 31 | No | Show | 31 | C | -2.2646400 | -1.0610640 | 1.6690150  |
| 32 | No | Show | 32 | C | -2.2929410 | -2.3374680 | 2.2429760  |
| 33 | No | Show | 33 | C | -2.8131940 | 0.0236080  | 2.3739250  |
| 34 | No | Show | 34 | C | -2.8519350 | -2.5250030 | 3.5090450  |
| 35 | No | Show | 35 | H | -1.8956970 | -3.1931270 | 1.7055750  |
| 36 | No | Show | 36 | C | -3.3751330 | -0.1719100 | 3.6329460  |
| 37 | No | Show | 37 | H | -2.8126470 | 1.0132250  | 1.9235350  |
| 38 | No | Show | 38 | C | -3.3912190 | -1.4456350 | 4.2070540  |
| 39 | No | Show | 39 | H | -2.8694370 | -3.5210340 | 3.9440140  |
| 40 | No | Show | 40 | H | -3.8030410 | 0.6731260  | 4.1663250  |
| 41 | No | Show | 41 | H | -3.8272870 | -1.5954690 | 5.1913800  |
| 42 | No | Show | 42 | O | -0.7423530 | 4.7765500  | 0.9800580  |
| 43 | No | Show | 43 | H | -0.3990220 | 5.5839850  | 0.5766470  |
| 44 | No | Show | 44 | O | -1.6257680 | 3.9327300  | -1.1572790 |
| 45 | No | Show | 45 | H | -2.4714350 | 4.2695720  | -0.8289310 |
| 46 | No | Show | 46 | B | -0.7780870 | 3.7073060  | -0.0107600 |
| 47 | No | Show | 47 | O | -1.3201610 | 2.5103130  | 0.8219690  |
| 48 | No | Show | 48 | H | -1.1565270 | 2.7579700  | 1.7462050  |
| 49 | No | Show | 49 | C | 2.7529590  | -0.5815850 | 1.4348260  |
| 50 | No | Show | 50 | C | 1.6979730  | -0.5389460 | 2.3616670  |
| 51 | No | Show | 51 | C | 4.0601020  | -0.4063690 | 1.9243260  |
| 52 | No | Show | 52 | C | 1.9304920  | -0.3142690 | 3.7179600  |
| 53 | No | Show | 53 | H | 0.6757750  | -0.7018240 | 2.0314220  |
| 54 | No | Show | 54 | C | 4.2918000  | -0.1680170 | 3.2770880  |
| 55 | No | Show | 55 | H | 4.8980820  | -0.4617190 | 1.2397360  |
| 56 | No | Show | 56 | C | 3.2306210  | -0.1208780 | 4.1832340  |
| 57 | No | Show | 57 | H | 1.0914130  | -0.2955210 | 4.4089460  |
| 58 | No | Show | 58 | H | 5.3116350  | -0.0256740 | 3.6262830  |
| 59 | No | Show | 59 | H | 3.4163840  | 0.0572020  | 5.2394650  |
| 60 | No | Show | 60 | C | 0.7112270  | 3.2554690  | -0.5499580 |
| 61 | No | Show | 61 | C | 1.7208240  | 2.8786660  | 0.3734830  |
| 62 | No | Show | 62 | C | 1.0892800  | 3.3295940  | -1.9130020 |
| 63 | No | Show | 63 | C | 3.0465840  | 2.6371700  | -0.0392480 |
| 64 | No | Show | 64 | H | 1.5088800  | 2.9165490  | 1.4421950  |

---

|    |    |      |    |   |           |            |            |
|----|----|------|----|---|-----------|------------|------------|
| 65 | No | Show | 65 | C | 2.3965730 | 3.0955780  | -2.3192170 |
| 66 | No | Show | 66 | H | 0.3320390 | 3.6159720  | -2.6385890 |
| 67 | No | Show | 67 | C | 3.3834690 | 2.7517930  | -1.3794480 |
| 68 | No | Show | 68 | H | 3.8007240 | 2.3752640  | 0.6978360  |
| 69 | No | Show | 69 | H | 2.6637140 | 3.1830320  | -3.3703390 |
| 70 | No | Show | 70 | H | 4.4068370 | 2.5780610  | -1.7031920 |
| 71 | No | Show | 71 | O | 4.4477920 | -2.1739270 | -0.3026120 |
| 72 | No | Show | 72 | H | 0.5337550 | -0.0096670 | -2.6913710 |
| 73 | No | Show | 73 | C | 4.1573670 | -2.4691710 | -2.9363350 |
| 74 | No | Show | 74 | H | 3.8200550 | -2.4257030 | -3.9701860 |
| 75 | No | Show | 75 | H | 5.1658600 | -2.0602720 | -2.8420490 |
| 76 | No | Show | 76 | H | 4.1768660 | -3.5018300 | -2.5805840 |

## 27a

| Row | Highlight |      | Display Tag |    | Symbol | X         | Y          | Z          |
|-----|-----------|------|-------------|----|--------|-----------|------------|------------|
| 1   | No        | Show | 1           | H  | -      | 3.0665750 | -2.6707790 | -2.5786160 |
| 2   | No        | Show | 2           | C  | -      | 3.2680120 | -1.7521840 | -2.0416040 |
| 3   | No        | Show | 3           | C  | -      | 4.5272580 | -1.3391820 | -1.5187700 |
| 4   | No        | Show | 4           | C  | -      | 2.3255500 | -0.7082660 | -1.7766470 |
| 5   | No        | Show | 5           | C  | -      | 4.3672200 | -0.0617540 | -0.9006180 |
| 6   | No        | Show | 6           | H  | -      | 5.4443670 | -1.9144600 | -1.5510370 |
| 7   | No        | Show | 7           | C  | -      | 3.0052910 | 0.3337450  | -1.0402120 |
| 8   | No        | Show | 8           | Fe | -      | 3.1566650 | -1.4686410 | -0.0165940 |
| 9   | No        | Show | 9           | C  | -      | 3.9662820 | -1.5118900 | 1.8524840  |
| 10  | No        | Show | 10          | C  | -      | 2.5711350 | -1.2350150 | 1.9461120  |
| 11  | No        | Show | 11          | C  | -      | 4.1220940 | -2.7766550 | 1.2051930  |
| 12  | No        | Show | 12          | H  | -      | 4.7676640 | -0.8551460 | 2.1676220  |
| 13  | No        | Show | 13          | C  | -      | 1.8618440 | -2.3350920 | 1.3709900  |
| 14  | No        | Show | 14          | H  | -      | 2.1315750 | -0.3278430 | 2.3422750  |
| 15  | No        | Show | 15          | C  | -      | 2.8212890 | -3.2797970 | 0.8997590  |
| 16  | No        | Show | 16          | H  | -      | 5.0631990 | -3.2507260 | 0.9550130  |
| 17  | No        | Show | 17          | H  | -      | 0.7891010 | -2.4492120 | 1.2695860  |
| 18  | No        | Show | 18          | H  | -      | 2.5983680 | -4.2083930 | 0.3889890  |
| 19  | No        | Show | 19          | H  | -      | 1.3616410 | -0.6080400 | -2.2838140 |
| 20  | No        | Show | 20          | H  | -      | 5.1252620 | 0.5062430  | -0.3803030 |
| 21  | No        | Show | 21          | C  | -      | 2.2984090 | 1.4878560  | -0.4784250 |
| 22  | No        | Show | 22          | C  | -      | 3.0408030 | 2.7110820  | -0.2160670 |
| 23  | No        | Show | 23          | C  | -      | 0.9513810 | 1.3811300  | -0.1751990 |
| 24  | No        | Show | 24          | N  | -      | 2.2555900 | 3.7602870  | 0.2649600  |
| 25  | No        | Show | 25          | C  | -      | 0.3356690 | 2.5604530  | 0.3400300  |
| 26  | No        | Show | 26          | N  | -      | 0.9483030 | 3.7035020  | 0.5411090  |
| 27  | No        | Show | 27          | Pd | -      | 0.2125710 | -0.5266590 | -0.4660730 |
| 28  | No        | Show | 28          | P  | -      | 2.0257880 | -0.0873810 | -0.0280470 |
| 29  | No        | Show | 29          | O  | -      | 4.2572680 | 2.8793050  | -0.3751340 |
| 30  | No        | Show | 30          | H  | -      | 0.7160370 | 2.5902750  | 0.6049550  |

---

|    |    |      |    |   |            |            |            |
|----|----|------|----|---|------------|------------|------------|
| 31 | No | Show | 31 | C | 2.3270980  | 0.8324310  | 1.5304520  |
| 32 | No | Show | 32 | C | 1.5592070  | 0.4838950  | 2.6513280  |
| 33 | No | Show | 33 | C | 3.2896000  | 1.8426780  | 1.6497600  |
| 34 | No | Show | 34 | C | 1.7621390  | 1.1218040  | 3.8731760  |
| 35 | No | Show | 35 | H | 0.7951960  | -0.2849910 | 2.5626790  |
| 36 | No | Show | 36 | C | 3.4825570  | 2.4887580  | 2.8721580  |
| 37 | No | Show | 37 | H | 3.8829550  | 2.1384050  | 0.7891250  |
| 38 | No | Show | 38 | C | 2.7237880  | 2.1282000  | 3.9855170  |
| 39 | No | Show | 39 | H | 1.1613680  | 0.8408020  | 4.7342970  |
| 40 | No | Show | 40 | H | 4.2255870  | 3.2782850  | 2.9503840  |
| 41 | No | Show | 41 | H | 2.8743740  | 2.6348720  | 4.9352460  |
| 42 | No | Show | 42 | C | 2.8508370  | 0.8792930  | -1.3516820 |
| 43 | No | Show | 43 | C | 4.2404670  | 0.8121080  | -1.5376840 |
| 44 | No | Show | 44 | C | 2.0882650  | 1.6993310  | -2.1927090 |
| 45 | No | Show | 45 | C | 4.8536240  | 1.5659640  | -2.5371460 |
| 46 | No | Show | 46 | H | 4.8431200  | 0.1608460  | -0.9100240 |
| 47 | No | Show | 47 | C | 2.7053520  | 2.4559430  | -3.1889770 |
| 48 | No | Show | 48 | H | 1.0088030  | 1.7378630  | -2.0724790 |
| 49 | No | Show | 49 | C | 4.0880350  | 2.3920820  | -3.3624200 |
| 50 | No | Show | 50 | H | 5.9301920  | 1.5026920  | -2.6742440 |
| 51 | No | Show | 51 | H | 2.1015470  | 3.0884520  | -3.8344980 |
| 52 | No | Show | 52 | H | 4.5674130  | 2.9766600  | -4.1435840 |
| 53 | No | Show | 53 | C | 3.0839370  | -1.5697750 | 0.1281260  |
| 54 | No | Show | 54 | C | 3.8264330  | -1.8405470 | 1.2845140  |
| 55 | No | Show | 55 | C | 3.1523750  | -2.4543030 | -0.9595590 |
| 56 | No | Show | 56 | C | 4.6391980  | -2.9735810 | 1.3482350  |
| 57 | No | Show | 57 | H | 3.7846680  | -1.1678350 | 2.1361750  |
| 58 | No | Show | 58 | C | 3.9725760  | -3.5776090 | -0.8921950 |
| 59 | No | Show | 59 | H | 2.5495320  | -2.2738920 | -1.8422700 |
| 60 | No | Show | 60 | C | 4.7162440  | -3.8417390 | 0.2596300  |
| 61 | No | Show | 61 | H | 5.2150600  | -3.1712070 | 2.2489320  |
| 62 | No | Show | 62 | H | 4.0187250  | -4.2572250 | -1.7393050 |
| 63 | No | Show | 63 | H | 5.3511990  | -4.7230040 | 0.3095290  |
| 64 | No | Show | 64 | O | 0.3793090  | -2.4623900 | -0.8360410 |
| 65 | No | Show | 65 | H | -0.4313300 | -2.9002340 | -1.1427040 |
| 66 | No | Show | 66 | C | -2.9153940 | 5.0325560  | 0.5264370  |
| 67 | No | Show | 67 | H | -3.4321130 | 5.3758700  | -0.3722750 |
| 68 | No | Show | 68 | H | -3.6579780 | 4.9180960  | 1.3202930  |
| 69 | No | Show | 69 | H | -2.1455720 | 5.7419540  | 0.8245750  |

## 27b

| Row | Highlight |      | Display Tag |   | Symbol    | X | Y         | Z          |
|-----|-----------|------|-------------|---|-----------|---|-----------|------------|
| 1   | No        | Show | 1           | C | 3.0207100 |   | 0.2027680 | 0.1812630  |
| 2   | No        | Show | 2           | C | 4.0847230 |   | 1.1713090 | -0.0259410 |
| 3   | No        | Show | 3           | C | 1.7436390 |   | 0.6007240 | 0.5172830  |

---

|    |    |      |    |    |            |            |            |
|----|----|------|----|----|------------|------------|------------|
| 4  | No | Show | 4  | N  | 3.7099800  | 2.4860250  | 0.2720540  |
| 5  | No | Show | 5  | C  | 1.5500040  | 1.9943150  | 0.7561160  |
| 6  | No | Show | 6  | N  | 2.4973180  | 2.8953910  | 0.6633280  |
| 7  | No | Show | 7  | Pd | 0.4634860  | -0.9878370 | 0.6501200  |
| 8  | No | Show | 8  | P  | -1.4800100 | 0.0433820  | -0.0502850 |
| 9  | No | Show | 9  | O  | 5.2328630  | 0.9326560  | -0.4178470 |
| 10 | No | Show | 10 | H  | 0.5881500  | 2.3991560  | 1.0567810  |
| 11 | No | Show | 11 | C  | -1.2733090 | 1.6468560  | -0.9110270 |
| 12 | No | Show | 12 | C  | -0.3337060 | 1.7197810  | -1.9510780 |
| 13 | No | Show | 13 | C  | -2.0180190 | 2.7853430  | -0.5814750 |
| 14 | No | Show | 14 | C  | -0.1597000 | 2.9047350  | -2.6616560 |
| 15 | No | Show | 15 | H  | 0.2685370  | 0.8488580  | -2.2002290 |
| 16 | No | Show | 16 | C  | -1.8307890 | 3.9760400  | -1.2869010 |
| 17 | No | Show | 17 | H  | -2.7414260 | 2.7512100  | 0.2281150  |
| 18 | No | Show | 18 | C  | -0.9068480 | 4.0371980  | -2.3292450 |
| 19 | No | Show | 19 | H  | 0.5710430  | 2.9478010  | -3.4650210 |
| 20 | No | Show | 20 | H  | -2.4086780 | 4.8561640  | -1.0167040 |
| 21 | No | Show | 21 | H  | -0.7611520 | 4.9658070  | -2.8750020 |
| 22 | No | Show | 22 | C  | -2.5686500 | 0.3828080  | 1.3806590  |
| 23 | No | Show | 23 | C  | -3.9611990 | 0.4613650  | 1.2395480  |
| 24 | No | Show | 24 | C  | -1.9934310 | 0.5878090  | 2.6408850  |
| 25 | No | Show | 25 | C  | -4.7616300 | 0.7562700  | 2.3425120  |
| 26 | No | Show | 26 | H  | -4.4225810 | 0.2827220  | 0.2718970  |
| 27 | No | Show | 27 | C  | -2.7958530 | 0.8892050  | 3.7404590  |
| 28 | No | Show | 28 | H  | -0.9169310 | 0.4949260  | 2.7634950  |
| 29 | No | Show | 29 | C  | -4.1807190 | 0.9744880  | 3.5930210  |
| 30 | No | Show | 30 | H  | -5.8409640 | 0.8092770  | 2.2247800  |
| 31 | No | Show | 31 | H  | -2.3391040 | 1.0425830  | 4.7146240  |
| 32 | No | Show | 32 | H  | -4.8072570 | 1.1993600  | 4.4523850  |
| 33 | No | Show | 33 | C  | -2.5333130 | -0.9232530 | -1.2023460 |
| 34 | No | Show | 34 | C  | -2.9995020 | -0.3846350 | -2.4094900 |
| 35 | No | Show | 35 | C  | -2.9154190 | -2.2220810 | -0.8283940 |
| 36 | No | Show | 36 | C  | -3.8358250 | -1.1374120 | -3.2361070 |
| 37 | No | Show | 37 | H  | -2.7226960 | 0.6213430  | -2.7096190 |
| 38 | No | Show | 38 | C  | -3.7573270 | -2.9613510 | -1.6569330 |
| 39 | No | Show | 39 | H  | -2.5161850 | -2.6381420 | 0.0957940  |
| 40 | No | Show | 40 | C  | -4.2177900 | -2.4251800 | -2.8617480 |
| 41 | No | Show | 41 | H  | -4.1897460 | -0.7107570 | -4.1713060 |
| 42 | No | Show | 42 | H  | -4.0500110 | -3.9657880 | -1.3607220 |
| 43 | No | Show | 43 | H  | -4.8708520 | -3.0086920 | -3.5061530 |
| 44 | No | Show | 44 | O  | -0.6428350 | -2.6733510 | 1.0437660  |
| 45 | No | Show | 45 | H  | -0.2901460 | -3.3707400 | 0.4682430  |
| 46 | No | Show | 46 | C  | 3.2701410  | -1.2446650 | 0.0404970  |
| 47 | No | Show | 47 | C  | 4.0359830  | -1.8092990 | -0.9910010 |
| 48 | No | Show | 48 | C  | 2.6364140  | -2.1100410 | 0.9609220  |



---

|    |    |      |    |   |           |            |            |
|----|----|------|----|---|-----------|------------|------------|
| 49 | No | Show | 49 | C | 4.1242810 | -3.1928910 | -1.1173410 |
| 50 | No | Show | 50 | H | 4.5554720 | -1.1566820 | -1.6841550 |
| 51 | No | Show | 51 | C | 2.7172300 | -3.5007870 | 0.8187610  |
| 52 | No | Show | 52 | H | 2.2251550 | -1.6974730 | 1.8913040  |
| 53 | No | Show | 53 | C | 3.4584760 | -4.0438710 | -0.2257220 |
| 54 | No | Show | 54 | H | 4.7172680 | -3.6175700 | -1.9238020 |
| 55 | No | Show | 55 | H | 2.2167280 | -4.1413880 | 1.5393300  |
| 56 | No | Show | 56 | H | 3.5354050 | -5.1219050 | -0.3405220 |
| 57 | No | Show | 57 | C | 4.7292330 | 3.5200930  | 0.1467340  |
| 58 | No | Show | 58 | H | 5.5937840 | 3.2687950  | 0.7650710  |
| 59 | No | Show | 59 | H | 5.0655880 | 3.5950210  | -0.8903350 |
| 60 | No | Show | 60 | H | 4.2822720 | 4.4576800  | 0.4719380  |

### 33a

| Row | Highlight |      | Display Tag |    | Symbol     | X          | Y          | Z |
|-----|-----------|------|-------------|----|------------|------------|------------|---|
| 1   | No        | Show | 1           | H  | -4.4710700 | -2.0021310 | -1.5432820 |   |
| 2   | No        | Show | 2           | C  | -4.2513680 | -0.9715160 | -1.2941730 |   |
| 3   | No        | Show | 3           | C  | -5.1655520 | -0.0176380 | -0.7519950 |   |
| 4   | No        | Show | 4           | C  | -2.9897130 | -0.3231640 | -1.4477480 |   |
| 5   | No        | Show | 5           | C  | -4.4646170 | 1.2110160  | -0.5578680 |   |
| 6   | No        | Show | 6           | H  | -6.2015740 | -0.2060070 | -0.4984840 |   |
| 7   | No        | Show | 7           | C  | -3.1105610 | 1.0340090  | -0.9911380 |   |
| 8   | No        | Show | 8           | Fe | -3.6050900 | -0.2984060 | 0.5143900  |   |
| 9   | No        | Show | 9           | C  | -3.8277190 | 0.2808650  | 2.4547120  |   |
| 10  | No        | Show | 10          | C  | -2.4472540 | 0.0565880  | 2.1666320  |   |
| 11  | No        | Show | 11          | C  | -4.5294310 | -0.9395870 | 2.2108140  |   |
| 12  | No        | Show | 12          | H  | -4.2705920 | 1.2203420  | 2.7624320  |   |
| 13  | No        | Show | 13          | C  | -2.2918020 | -1.2998750 | 1.7475730  |   |
| 14  | No        | Show | 14          | H  | -1.6580320 | 0.7947270  | 2.2258840  |   |
| 15  | No        | Show | 15          | C  | -3.5796840 | -1.9125390 | 1.7706740  |   |
| 16  | No        | Show | 16          | H  | -5.5983190 | -1.0913960 | 2.2996760  |   |
| 17  | No        | Show | 17          | H  | -1.3717340 | -1.7744610 | 1.4291440  |   |
| 18  | No        | Show | 18          | H  | -3.8029910 | -2.9297390 | 1.4727370  |   |
| 19  | No        | Show | 19          | H  | -2.1119730 | -0.7771080 | -1.9122260 |   |
| 20  | No        | Show | 20          | H  | -4.8810740 | 2.1104170  | -0.1203840 |   |
| 21  | No        | Show | 21          | C  | -0.7060480 | 1.6885200  | -1.1155110 |   |
| 22  | No        | Show | 22          | C  | 0.2579660  | 2.6841120  | -1.5438280 |   |
| 23  | No        | Show | 23          | C  | -2.0419430 | 2.0355770  | -1.1193460 |   |
| 24  | No        | Show | 24          | N  | -0.2476980 | 3.9752180  | -1.7330090 |   |
| 25  | No        | Show | 25          | C  | -2.3981090 | 3.3980680  | -1.3818520 |   |
| 26  | No        | Show | 26          | N  | -1.5344220 | 4.3368730  | -1.6564390 |   |
| 27  | No        | Show | 27          | Pd | -0.2267860 | -0.2424170 | -0.7582450 |   |
| 28  | No        | Show | 28          | P  | 1.6954030  | 0.1899350  | 0.4568260  |   |
| 29  | No        | Show | 29          | O  | 1.4611140  | 2.4849080  | -1.7672100 |   |
| 30  | No        | Show | 30          | H  | -3.4357300 | 3.7226190  | -1.3708870 |   |

---

|    |    |      |    |   |            |            |            |
|----|----|------|----|---|------------|------------|------------|
| 31 | No | Show | 31 | C | 2.0475200  | 1.8827770  | 1.0598460  |
| 32 | No | Show | 32 | C | 1.0094120  | 2.6580600  | 1.5915550  |
| 33 | No | Show | 33 | C | 3.3484050  | 2.3984050  | 1.0478170  |
| 34 | No | Show | 34 | C | 1.2691920  | 3.9236980  | 2.1159360  |
| 35 | No | Show | 35 | H | -0.0095510 | 2.2792060  | 1.5877460  |
| 36 | No | Show | 36 | C | 3.6055540  | 3.6656410  | 1.5706330  |
| 37 | No | Show | 37 | H | 4.1624380  | 1.8222290  | 0.6187070  |
| 38 | No | Show | 38 | C | 2.5699220  | 4.4305870  | 2.1083820  |
| 39 | No | Show | 39 | H | 0.4525190  | 4.5136530  | 2.5242260  |
| 40 | No | Show | 40 | H | 4.6196900  | 4.0567120  | 1.5510600  |
| 41 | No | Show | 41 | H | 2.7738500  | 5.4185310  | 2.5136350  |
| 42 | No | Show | 42 | C | 3.1757050  | -0.3371830 | -0.4826660 |
| 43 | No | Show | 43 | C | 4.2573230  | -0.9691010 | 0.1478630  |
| 44 | No | Show | 44 | C | 3.2370530  | -0.0788350 | -1.8595390 |
| 45 | No | Show | 45 | C | 5.3841060  | -1.3339570 | -0.5881680 |
| 46 | No | Show | 46 | H | 4.2250180  | -1.1784750 | 1.2131430  |
| 47 | No | Show | 47 | C | 4.3674970  | -0.4446440 | -2.5889060 |
| 48 | No | Show | 48 | H | 2.4130200  | 0.4305730  | -2.3488350 |
| 49 | No | Show | 49 | C | 5.4415720  | -1.0731500 | -1.9577380 |
| 50 | No | Show | 50 | H | 6.2143890  | -1.8268410 | -0.0889090 |
| 51 | No | Show | 51 | H | 4.4055070  | -0.2371770 | -3.6552170 |
| 52 | No | Show | 52 | H | 6.3190420  | -1.3620970 | -2.5311160 |
| 53 | No | Show | 53 | C | 1.7230920  | -0.8122090 | 1.9999330  |
| 54 | No | Show | 54 | C | 1.6988970  | -0.2040920 | 3.2643800  |
| 55 | No | Show | 55 | C | 1.7690380  | -2.2151810 | 1.9193260  |
| 56 | No | Show | 56 | C | 1.7126340  | -0.9795400 | 4.4244640  |
| 57 | No | Show | 57 | H | 1.6857890  | 0.8769830  | 3.3562300  |
| 58 | No | Show | 58 | C | 1.7944280  | -2.9807610 | 3.0839500  |
| 59 | No | Show | 59 | H | 1.7548710  | -2.6997290 | 0.9486700  |
| 60 | No | Show | 60 | C | 1.7615130  | -2.3699860 | 4.3385600  |
| 61 | No | Show | 61 | H | 1.6927440  | -0.4907500 | 5.3952720  |
| 62 | No | Show | 62 | H | 1.8342650  | -4.0643360 | 3.0049550  |
| 63 | No | Show | 63 | H | 1.7765190  | -2.9735340 | 5.2428700  |
| 64 | No | Show | 64 | O | 0.1581150  | -2.2684140 | -0.5102830 |
| 65 | No | Show | 65 | C | 0.6937980  | 5.0229660  | -2.1078970 |
| 66 | No | Show | 66 | H | 1.5130190  | 5.0570730  | -1.3868030 |
| 67 | No | Show | 67 | H | 1.1165750  | 4.8160910  | -3.0944630 |
| 68 | No | Show | 68 | H | 0.1462910  | 5.9638520  | -2.1187970 |
| 69 | No | Show | 69 | C | 0.4265310  | -2.8849290 | -1.6906430 |
| 70 | No | Show | 70 | H | 1.2230210  | -2.4022620 | -2.2793590 |
| 71 | No | Show | 71 | O | -0.7177060 | -2.7891470 | -2.5905660 |
| 72 | No | Show | 72 | H | -1.4700540 | -3.1187910 | -2.0729110 |
| 73 | No | Show | 73 | N | 0.8564140  | -4.2564620 | -1.4601960 |
| 74 | No | Show | 74 | C | -0.0965880 | -5.0610090 | -0.7135910 |
| 75 | No | Show | 75 | H | -0.9833820 | -5.3606990 | -1.3046850 |

---

|    |    |      |    |   |            |            |            |
|----|----|------|----|---|------------|------------|------------|
| 76 | No | Show | 76 | H | 0.3913710  | -5.9820290 | -0.3760230 |
| 77 | No | Show | 77 | H | -0.4289750 | -4.5040490 | 0.1646360  |
| 78 | No | Show | 78 | C | 1.2966240  | -4.9205920 | -2.6761950 |
| 79 | No | Show | 79 | H | 1.7684520  | -5.8749400 | -2.4174590 |
| 80 | No | Show | 80 | H | 0.4782240  | -5.1185110 | -3.3888280 |
| 81 | No | Show | 81 | H | 2.0452870  | -4.3038300 | -3.1831290 |

### 33b

| Row | Highlight |      | Display Tag |    | Symbol X   | Y          | Z          |
|-----|-----------|------|-------------|----|------------|------------|------------|
| 1   | No        | Show | 1           | C  | 1.4545010  | 1.4764690  | -0.7823170 |
| 2   | No        | Show | 2           | C  | 2.5473790  | 0.8220410  | -1.4831620 |
| 3   | No        | Show | 3           | C  | 1.6531540  | 2.7580950  | -0.3213720 |
| 4   | No        | Show | 4           | N  | 3.7481630  | 1.5413250  | -1.5212530 |
| 5   | No        | Show | 5           | C  | 2.9409040  | 3.3630890  | -0.4616530 |
| 6   | No        | Show | 6           | N  | 3.9546650  | 2.7720970  | -1.0340750 |
| 7   | No        | Show | 7           | Pd | -0.4067420 | 0.7100340  | -0.6476320 |
| 8   | No        | Show | 8           | P  | 0.2743090  | -1.2585940 | 0.3573410  |
| 9   | No        | Show | 9           | O  | 2.4942670  | -0.2825790 | -2.0409890 |
| 10  | No        | Show | 10          | H  | 3.1354680  | 4.3727150  | -0.1074160 |
| 11  | No        | Show | 11          | C  | 2.0336720  | -1.4397060 | 0.8152880  |
| 12  | No        | Show | 12          | C  | 2.6176760  | -0.4666200 | 1.6392990  |
| 13  | No        | Show | 13          | C  | 2.7965030  | -2.5359290 | 0.3998870  |
| 14  | No        | Show | 14          | C  | 3.9434770  | -0.5948860 | 2.0472870  |
| 15  | No        | Show | 15          | H  | 2.0333340  | 0.3894310  | 1.9680170  |
| 16  | No        | Show | 16          | C  | 4.1253100  | -2.6597300 | 0.8081640  |
| 17  | No        | Show | 17          | H  | 2.3604050  | -3.2897260 | -0.2485080 |
| 18  | No        | Show | 18          | C  | 4.7012410  | -1.6924880 | 1.6315130  |
| 19  | No        | Show | 19          | H  | 4.3859170  | 0.1644320  | 2.6870670  |
| 20  | No        | Show | 20          | H  | 4.7101400  | -3.5142780 | 0.4774280  |
| 21  | No        | Show | 21          | H  | 5.7368040  | -1.7906480 | 1.9475020  |
| 22  | No        | Show | 22          | C  | -0.1310870 | -2.6597610 | -0.7398830 |
| 23  | No        | Show | 23          | C  | -0.7782310 | -3.8012650 | -0.2504910 |
| 24  | No        | Show | 24          | C  | 0.2120800  | -2.5799290 | -2.0969760 |
| 25  | No        | Show | 25          | C  | -1.0700420 | -4.8598100 | -1.1111130 |
| 26  | No        | Show | 26          | H  | -1.0623760 | -3.8662820 | 0.7958030  |
| 27  | No        | Show | 27          | C  | -0.0770960 | -3.6447170 | -2.9479370 |
| 28  | No        | Show | 28          | H  | 0.7227430  | -1.6967610 | -2.4716990 |
| 29  | No        | Show | 29          | C  | -0.7199520 | -4.7839950 | -2.4592150 |
| 30  | No        | Show | 30          | H  | -1.5772530 | -5.7405090 | -0.7255330 |
| 31  | No        | Show | 31          | H  | 0.1944570  | -3.5791830 | -3.9984530 |
| 32  | No        | Show | 32          | H  | -0.9528710 | -5.6082090 | -3.1289000 |
| 33  | No        | Show | 33          | C  | -0.6102330 | -1.5842900 | 1.9307550  |
| 34  | No        | Show | 34          | C  | 0.0526740  | -2.1432610 | 3.0350770  |
| 35  | No        | Show | 35          | C  | -1.9831770 | -1.3090630 | 2.0133250  |
| 36  | No        | Show | 36          | C  | -0.6511790 | -2.4174080 | 4.2077330  |

---

|    |    |      |    |   |            |            |            |
|----|----|------|----|---|------------|------------|------------|
| 37 | No | Show | 37 | H | 1.1124020  | -2.3735120 | 2.9866490  |
| 38 | No | Show | 38 | C | -2.6770300 | -1.5865240 | 3.1902920  |
| 39 | No | Show | 39 | H | -2.4999320 | -0.8795980 | 1.1579390  |
| 40 | No | Show | 40 | C | -2.0162320 | -2.1376720 | 4.2890470  |
| 41 | No | Show | 41 | H | -0.1287100 | -2.8512360 | 5.0567730  |
| 42 | No | Show | 42 | H | -3.7390020 | -1.3614920 | 3.2403180  |
| 43 | No | Show | 43 | H | -2.5612390 | -2.3496660 | 5.2058500  |
| 44 | No | Show | 44 | O | -2.3116500 | -0.0757440 | -0.8225010 |
| 45 | No | Show | 45 | C | 4.8861730  | 0.9190950  | -2.1873760 |
| 46 | No | Show | 46 | H | 5.0832080  | -0.0583350 | -1.7428610 |
| 47 | No | Show | 47 | H | 4.6687770  | 0.7736580  | -3.2484800 |
| 48 | No | Show | 48 | H | 5.7400020  | 1.5822600  | -2.0608650 |
| 49 | No | Show | 49 | C | -3.3911060 | 0.7493700  | -0.7613280 |
| 50 | No | Show | 50 | H | -3.2358170 | 1.6644170  | -1.3962180 |
| 51 | No | Show | 51 | O | -3.6911130 | 1.2075550  | 0.5669460  |
| 52 | No | Show | 52 | H | -2.9235050 | 1.7245560  | 0.8543710  |
| 53 | No | Show | 53 | N | -4.5918010 | 0.0523400  | -1.2007610 |
| 54 | No | Show | 54 | C | -5.7444670 | 0.9386620  | -1.2546320 |
| 55 | No | Show | 55 | H | -5.6345600 | 1.7463770  | -2.0058800 |
| 56 | No | Show | 56 | H | -6.6328950 | 0.3566390  | -1.5204030 |
| 57 | No | Show | 57 | H | -5.9098250 | 1.3945190  | -0.2777210 |
| 58 | No | Show | 58 | C | -4.3887820 | -0.6280230 | -2.4708490 |
| 59 | No | Show | 59 | H | -5.2875270 | -1.2060220 | -2.7105000 |
| 60 | No | Show | 60 | H | -4.2008070 | 0.0689350  | -3.3116290 |
| 61 | No | Show | 61 | H | -3.5414330 | -1.3081390 | -2.3904210 |
| 62 | No | Show | 62 | C | 0.5144080  | 3.4946770  | 0.2670580  |
| 63 | No | Show | 63 | C | 0.6112170  | 4.2320950  | 1.4548870  |
| 64 | No | Show | 64 | C | -0.7365100 | 3.4290720  | -0.3819750 |
| 65 | No | Show | 65 | C | -0.5102980 | 4.8613640  | 1.9926160  |
| 66 | No | Show | 66 | H | 1.5642620  | 4.2875100  | 1.9762450  |
| 67 | No | Show | 67 | C | -1.8601680 | 4.0604560  | 0.1587090  |
| 68 | No | Show | 68 | H | -0.7935990 | 3.0087060  | -1.3912160 |
| 69 | No | Show | 69 | C | -1.7494940 | 4.7724180  | 1.3530690  |
| 70 | No | Show | 70 | H | -0.4191250 | 5.4188220  | 2.9215950  |
| 71 | No | Show | 71 | H | -2.8117080 | 4.0099190  | -0.3632550 |
| 72 | No | Show | 72 | H | -2.6211530 | 5.2628870  | 1.7779740  |

### 34a+32

| Row | Highlight | Display | Tag | Symbol | X         | Y          | Z          |
|-----|-----------|---------|-----|--------|-----------|------------|------------|
| 1   | No        | Show    | 1   | H      | 3.9764630 | -1.1583410 | -1.2385640 |
| 2   | No        | Show    | 2   | C      | 3.2100950 | -1.9176100 | -1.1517360 |
| 3   | No        | Show    | 3   | C      | 3.4135490 | -3.2873210 | -0.8212350 |
| 4   | No        | Show    | 4   | C      | 1.8056970 | -1.7229340 | -1.3508210 |
| 5   | No        | Show    | 5   | C      | 2.1398530 | -3.9380520 | -0.7759970 |
| 6   | No        | Show    | 6   | H      | 4.3664930 | -3.7480370 | -0.5918190 |

---

|    |    |      |    |    |            |            |            |
|----|----|------|----|----|------------|------------|------------|
| 7  | No | Show | 7  | C  | 1.1351000  | -2.9773060 | -1.0931280 |
| 8  | No | Show | 8  | Fe | 2.2259890  | -2.4037530 | 0.5739110  |
| 9  | No | Show | 9  | C  | 2.1583080  | -3.4259350 | 2.3323440  |
| 10 | No | Show | 10 | C  | 1.0756400  | -2.4995750 | 2.2796500  |
| 11 | No | Show | 11 | C  | 3.3778270  | -2.6860190 | 2.2262600  |
| 12 | No | Show | 12 | H  | 2.0709300  | -4.5038620 | 2.3939670  |
| 13 | No | Show | 13 | C  | 1.6307070  | -1.1884260 | 2.1579720  |
| 14 | No | Show | 14 | H  | 0.0215150  | -2.7486770 | 2.2869970  |
| 15 | No | Show | 15 | C  | 3.0526430  | -1.3025120 | 2.1024400  |
| 16 | No | Show | 16 | H  | 4.3750300  | -3.1076720 | 2.1931870  |
| 17 | No | Show | 17 | H  | 1.0843210  | -0.2550990 | 2.1223040  |
| 18 | No | Show | 18 | H  | 3.7438050  | -0.4841790 | 1.9397750  |
| 19 | No | Show | 19 | H  | 1.3678880  | -0.8653500 | -1.8766560 |
| 20 | No | Show | 20 | H  | 1.9680480  | -4.9669080 | -0.4836440 |
| 21 | No | Show | 21 | C  | -1.0754210 | -1.9625900 | -0.8345760 |
| 22 | No | Show | 22 | C  | -2.5132210 | -2.0899340 | -0.9666230 |
| 23 | No | Show | 23 | C  | -0.3296340 | -3.0915390 | -1.1097840 |
| 24 | No | Show | 24 | N  | -3.0005300 | -3.3825990 | -1.2272660 |
| 25 | No | Show | 25 | C  | -0.9672910 | -4.3314160 | -1.4189150 |
| 26 | No | Show | 26 | N  | -2.2642180 | -4.4770810 | -1.4602340 |
| 27 | No | Show | 27 | Pd | 0.0946380  | -0.2842380 | -0.2766000 |
| 28 | No | Show | 28 | P  | -1.5622010 | 1.2601270  | 0.1685960  |
| 29 | No | Show | 29 | O  | -3.3374600 | -1.1662190 | -0.8803560 |
| 30 | No | Show | 30 | H  | -0.3975650 | -5.2323910 | -1.6344830 |
| 31 | No | Show | 31 | C  | -2.8592130 | 0.6735890  | 1.3219140  |
| 32 | No | Show | 32 | C  | -2.4558460 | -0.0676450 | 2.4392530  |
| 33 | No | Show | 33 | C  | -4.2154700 | 0.9683010  | 1.1499400  |
| 34 | No | Show | 34 | C  | -3.3915250 | -0.4913450 | 3.3826420  |
| 35 | No | Show | 35 | H  | -1.4065920 | -0.3199080 | 2.5741130  |
| 36 | No | Show | 36 | C  | -5.1501040 | 0.5413160  | 2.0922150  |
| 37 | No | Show | 37 | H  | -4.5495210 | 1.5055330  | 0.2678730  |
| 38 | No | Show | 38 | C  | -4.7423720 | -0.1850020 | 3.2122360  |
| 39 | No | Show | 39 | H  | -3.0643400 | -1.0649210 | 4.2463430  |
| 40 | No | Show | 40 | H  | -6.2029230 | 0.7683940  | 1.9436100  |
| 41 | No | Show | 41 | H  | -5.4743690 | -0.5185290 | 3.9435750  |
| 42 | No | Show | 42 | C  | -2.3860390 | 1.9422770  | -1.3221880 |
| 43 | No | Show | 43 | C  | -3.0375850 | 3.1838190  | -1.2816570 |
| 44 | No | Show | 44 | C  | -2.3373750 | 1.2339930  | -2.5280530 |
| 45 | No | Show | 45 | C  | -3.6461190 | 3.6974160  | -2.4264420 |
| 46 | No | Show | 46 | H  | -3.0611580 | 3.7593390  | -0.3598630 |
| 47 | No | Show | 47 | C  | -2.9386690 | 1.7540740  | -3.6731070 |
| 48 | No | Show | 48 | H  | -1.8335160 | 0.2733190  | -2.5629840 |
| 49 | No | Show | 49 | C  | -3.5965330 | 2.9836980  | -3.6249760 |
| 50 | No | Show | 50 | H  | -4.1504870 | 4.6595160  | -2.3821380 |
| 51 | No | Show | 51 | H  | -2.8932870 | 1.1952150  | -4.6044130 |

---

|    |    |      |    |   |            |            |            |
|----|----|------|----|---|------------|------------|------------|
| 52 | No | Show | 52 | H | -4.0642480 | 3.3879950  | -4.5193890 |
| 53 | No | Show | 53 | C | -0.9790860 | 2.8097890  | 0.9919160  |
| 54 | No | Show | 54 | C | -1.5000480 | 3.2642100  | 2.2082710  |
| 55 | No | Show | 55 | C | 0.0055730  | 3.5748540  | 0.3489910  |
| 56 | No | Show | 56 | C | -1.0392010 | 4.4570250  | 2.7745590  |
| 57 | No | Show | 57 | H | -2.2684550 | 2.6950610  | 2.7225490  |
| 58 | No | Show | 58 | C | 0.4531770  | 4.7680360  | 0.9063610  |
| 59 | No | Show | 59 | H | 0.4287760  | 3.2333410  | -0.5919670 |
| 60 | No | Show | 60 | C | -0.0652950 | 5.2124300  | 2.1265660  |
| 61 | No | Show | 61 | H | -1.4489550 | 4.7913310  | 3.7245480  |
| 62 | No | Show | 62 | H | 1.2156840  | 5.3476840  | 0.3923800  |
| 63 | No | Show | 63 | H | 0.2920610  | 6.1395170  | 2.5678300  |
| 64 | No | Show | 64 | O | 4.6037390  | 1.3023920  | 0.5603000  |
| 65 | No | Show | 65 | C | -4.4439220 | -3.5560940 | -1.3188300 |
| 66 | No | Show | 66 | H | -4.9213410 | -3.1743000 | -0.4139510 |
| 67 | No | Show | 67 | H | -4.8403420 | -2.9962100 | -2.1701790 |
| 68 | No | Show | 68 | H | -4.6383890 | -4.6205760 | -1.4400200 |
| 69 | No | Show | 69 | C | 4.3926610  | 2.0267820  | -0.4075970 |
| 70 | No | Show | 70 | H | 1.0814880  | 0.9669660  | 0.0819820  |
| 71 | No | Show | 71 | O | 3.1856230  | 2.1174200  | -1.0132560 |
| 72 | No | Show | 72 | H | 2.5500500  | 1.5525620  | -0.5106290 |
| 73 | No | Show | 73 | N | 5.3337540  | 2.8180700  | -0.9976940 |
| 74 | No | Show | 74 | C | 6.6805070  | 2.8355900  | -0.4623980 |
| 75 | No | Show | 75 | H | 7.4007070  | 2.4996490  | -1.2189060 |
| 76 | No | Show | 76 | H | 6.9558610  | 3.8507400  | -0.1508090 |
| 77 | No | Show | 77 | H | 6.7305720  | 2.1720140  | 0.3991710  |
| 78 | No | Show | 78 | C | 5.0784770  | 3.6658860  | -2.1468480 |
| 79 | No | Show | 79 | H | 5.2735920  | 4.7167480  | -1.8980350 |
| 80 | No | Show | 80 | H | 5.7344780  | 3.3853930  | -2.9804990 |
| 81 | No | Show | 81 | H | 4.0443790  | 3.5668190  | -2.4671250 |

### 34b+32

| Row | Highlight | Display | Tag | Symbol | X          | Y          | Z          |
|-----|-----------|---------|-----|--------|------------|------------|------------|
| 1   | No        | Show    | 1   | C      | 0.5600290  | 2.0351690  | -0.6786840 |
| 2   | No        | Show    | 2   | C      | 1.3670550  | 1.9290190  | -1.8791670 |
| 3   | No        | Show    | 3   | C      | 0.3942770  | 3.2901170  | -0.1379950 |
| 4   | No        | Show    | 4   | N      | 1.9965230  | 3.1144200  | -2.2903080 |
| 5   | No        | Show    | 5   | C      | 1.0772760  | 4.4154370  | -0.6898570 |
| 6   | No        | Show    | 6   | N      | 1.8621440  | 4.3259960  | -1.7300600 |
| 7   | No        | Show    | 7   | Pd     | -0.5093630 | 0.5681510  | 0.3648060  |
| 8   | No        | Show    | 8   | P      | 0.9424930  | -1.1870660 | 0.2766310  |
| 9   | No        | Show    | 9   | O      | 1.5337570  | 0.9074910  | -2.5641660 |
| 10  | No        | Show    | 10  | H      | 0.9712330  | 5.4170140  | -0.2790030 |
| 11  | No        | Show    | 11  | C      | 2.6773910  | -0.7859340 | -0.1581240 |
| 12  | No        | Show    | 12  | C      | 3.3013300  | 0.2487480  | 0.5514710  |

---

|    |    |      |    |   |            |            |            |
|----|----|------|----|---|------------|------------|------------|
| 13 | No | Show | 13 | C | 3.4032490  | -1.4945260 | -1.1204970 |
| 14 | No | Show | 14 | C | 4.6362710  | 0.5625280  | 0.3076680  |
| 15 | No | Show | 15 | H | 2.7396600  | 0.8154220  | 1.2908550  |
| 16 | No | Show | 16 | C | 4.7396700  | -1.1754310 | -1.3651160 |
| 17 | No | Show | 17 | H | 2.9285860  | -2.2885610 | -1.6896040 |
| 18 | No | Show | 18 | C | 5.3595410  | -0.1498090 | -0.6522210 |
| 19 | No | Show | 19 | H | 5.1098970  | 1.3686660  | 0.8622930  |
| 20 | No | Show | 20 | H | 5.2933880  | -1.7282790 | -2.1199160 |
| 21 | No | Show | 21 | H | 6.4000520  | 0.0985880  | -0.8461960 |
| 22 | No | Show | 22 | C | 0.3898370  | -2.4457440 | -0.9298490 |
| 23 | No | Show | 23 | C | 0.0907160  | -3.7599060 | -0.5511890 |
| 24 | No | Show | 24 | C | 0.2143430  | -2.0467710 | -2.2646380 |
| 25 | No | Show | 25 | C | -0.3670550 | -4.6737380 | -1.5019570 |
| 26 | No | Show | 26 | H | 0.2076360  | -4.0749360 | 0.4818610  |
| 27 | No | Show | 27 | C | -0.2342440 | -2.9692280 | -3.2079520 |
| 28 | No | Show | 28 | H | 0.4473130  | -1.0233390 | -2.5557140 |
| 29 | No | Show | 29 | C | -0.5273250 | -4.2820310 | -2.8307610 |
| 30 | No | Show | 30 | H | -0.5989400 | -5.6919760 | -1.1996570 |
| 31 | No | Show | 31 | H | -0.3602220 | -2.6566890 | -4.2415500 |
| 32 | No | Show | 32 | H | -0.8826030 | -4.9960580 | -3.5698110 |
| 33 | No | Show | 33 | C | 1.1785600  | -2.0893990 | 1.8674050  |
| 34 | No | Show | 34 | C | 2.2924720  | -2.9309600 | 2.0251610  |
| 35 | No | Show | 35 | C | 0.2766060  | -1.9558190 | 2.9288770  |
| 36 | No | Show | 36 | C | 2.4845390  | -3.6354520 | 3.2117030  |
| 37 | No | Show | 37 | H | 3.0166020  | -3.0345360 | 1.2219390  |
| 38 | No | Show | 38 | C | 0.4733510  | -2.6594830 | 4.1185370  |
| 39 | No | Show | 39 | H | -0.5798950 | -1.2965130 | 2.8172980  |
| 40 | No | Show | 40 | C | 1.5747760  | -3.5016770 | 4.2629070  |
| 41 | No | Show | 41 | H | 3.3502580  | -4.2846090 | 3.3164210  |
| 42 | No | Show | 42 | H | -0.2358040 | -2.5418260 | 4.9339680  |
| 43 | No | Show | 43 | H | 1.7294050  | -4.0463670 | 5.1910190  |
| 44 | No | Show | 44 | O | -3.9849760 | 0.7577460  | -0.4078100 |
| 45 | No | Show | 45 | C | 2.8422750  | 3.0558750  | -3.4751090 |
| 46 | No | Show | 46 | H | 3.5943320  | 2.2735930  | -3.3540180 |
| 47 | No | Show | 47 | H | 2.2425780  | 2.8153890  | -4.3570850 |
| 48 | No | Show | 48 | H | 3.3119490  | 4.0313940  | -3.5902490 |
| 49 | No | Show | 49 | C | -4.3077800 | -0.4236870 | -0.5242940 |
| 50 | No | Show | 50 | H | -1.4060090 | -0.5245200 | 1.2114580  |
| 51 | No | Show | 51 | O | -3.5636980 | -1.4381580 | -0.0372170 |
| 52 | No | Show | 52 | H | -2.7507400 | -1.0322760 | 0.3557790  |
| 53 | No | Show | 53 | N | -5.4432550 | -0.8500910 | -1.1453260 |
| 54 | No | Show | 54 | C | -6.3520990 | 0.1260710  | -1.7118240 |
| 55 | No | Show | 55 | H | -6.4578130 | -0.0291310 | -2.7927420 |
| 56 | No | Show | 56 | H | -7.3445190 | 0.0396940  | -1.2520370 |
| 57 | No | Show | 57 | H | -5.9594310 | 1.1253710  | -1.5319170 |

---

|    |    |      |    |   |            |            |            |
|----|----|------|----|---|------------|------------|------------|
| 58 | No | Show | 58 | C | -5.8080820 | -2.2462940 | -1.2921650 |
| 59 | No | Show | 59 | H | -6.7605760 | -2.4495010 | -0.7862570 |
| 60 | No | Show | 60 | H | -5.9239510 | -2.4982580 | -2.3537280 |
| 61 | No | Show | 61 | H | -5.0385410 | -2.8833370 | -0.8633360 |
| 62 | No | Show | 62 | C | -0.5227390 | 3.3954540  | 1.0179950  |
| 63 | No | Show | 63 | C | -0.2439000 | 4.1586620  | 2.1590180  |
| 64 | No | Show | 64 | C | -1.7030120 | 2.6166170  | 0.9965230  |
| 65 | No | Show | 65 | C | -1.1049070 | 4.1269130  | 3.2556000  |
| 66 | No | Show | 66 | H | 0.6656380  | 4.7528360  | 2.2031100  |
| 67 | No | Show | 67 | C | -2.5556180 | 2.5787950  | 2.1058550  |
| 68 | No | Show | 68 | H | -2.0655150 | 2.1805300  | 0.0553660  |
| 69 | No | Show | 69 | C | -2.2554930 | 3.3317170  | 3.2391650  |
| 70 | No | Show | 70 | H | -0.8707460 | 4.7192240  | 4.1370380  |
| 71 | No | Show | 71 | H | -3.4596530 | 1.9805210  | 2.0468280  |
| 72 | No | Show | 72 | H | -2.9166890 | 3.3131990  | 4.1015620  |

### 35a+32

| Row | Highlight |      | Display Tag |    | Symbol | X          | Y         | Z          |
|-----|-----------|------|-------------|----|--------|------------|-----------|------------|
| 1   | No        | Show | 1           | H  |        | 3.6452530  | 1.3343570 | 1.3565850  |
| 2   | No        | Show | 2           | C  |        | 2.8380590  | 2.0347070 | 1.1851590  |
| 3   | No        | Show | 3           | C  |        | 2.9658600  | 3.4083200 | 0.8338570  |
| 4   | No        | Show | 4           | C  |        | 1.4408840  | 1.7452190 | 1.3004150  |
| 5   | No        | Show | 5           | C  |        | 1.6583220  | 3.9699210 | 0.7013410  |
| 6   | No        | Show | 6           | H  |        | 3.8977460  | 3.9305700 | 0.6543780  |
| 7   | No        | Show | 7           | C  |        | 0.7045300  | 2.9469820 | 0.9660870  |
| 8   | No        | Show | 8           | Fe |        | 1.9344850  | 2.4129030 | -0.6142620 |
| 9   | No        | Show | 9           | C  |        | 2.0282480  | 3.4550630 | -2.3580300 |
| 10  | No        | Show | 10          | C  |        | 0.9113170  | 2.5705310 | -2.3980260 |
| 11  | No        | Show | 11          | C  |        | 3.2092030  | 2.6670230 | -2.1818630 |
| 12  | No        | Show | 12          | H  |        | 1.9838770  | 4.5362830 | -2.4028420 |
| 13  | No        | Show | 13          | C  |        | 1.4055160  | 1.2377150 | -2.2597570 |
| 14  | No        | Show | 14          | H  |        | -0.1295510 | 2.8596540 | -2.4768380 |
| 15  | No        | Show | 15          | C  |        | 2.8269560  | 1.2967690 | -2.1034710 |
| 16  | No        | Show | 16          | H  |        | 4.2167170  | 3.0495040 | -2.0725660 |
| 17  | No        | Show | 17          | H  |        | 0.8246640  | 0.3247340 | -2.3148600 |
| 18  | No        | Show | 18          | H  |        | 3.4819810  | 0.4502430 | -1.9311320 |
| 19  | No        | Show | 19          | H  |        | 1.0307170  | 0.8714540 | 1.8152490  |
| 20  | No        | Show | 20          | H  |        | 1.4133960  | 4.9806400 | 0.4062360  |
| 21  | No        | Show | 21          | C  |        | -0.7531540 | 2.9468750 | 0.8106220  |
| 22  | No        | Show | 22          | C  |        | -1.4865750 | 4.1884430 | 0.9970680  |
| 23  | No        | Show | 23          | C  |        | -1.3846790 | 1.7709790 | 0.4437000  |
| 24  | No        | Show | 24          | N  |        | -2.8691980 | 4.0526240 | 0.8600760  |
| 25  | No        | Show | 25          | C  |        | -2.8049990 | 1.8508480 | 0.3324910  |
| 26  | No        | Show | 26          | N  |        | -3.5247560 | 2.9306980 | 0.5372880  |
| 27  | No        | Show | 27          | Pd |        | -0.0044830 | 0.1918220 | 0.0334510  |



---

|    |    |      |    |   |            |            |            |
|----|----|------|----|---|------------|------------|------------|
| 28 | No | Show | 28 | P | -1.4385180 | -1.6049930 | -0.0994860 |
| 29 | No | Show | 29 | O | -1.0006880 | 5.3010470  | 1.2455890  |
| 30 | No | Show | 30 | H | -3.4061900 | 0.9878500  | 0.0612600  |
| 31 | No | Show | 31 | C | -2.9247520 | -1.3036890 | -1.1335270 |
| 32 | No | Show | 32 | C | -2.7574390 | -0.6101770 | -2.3410860 |
| 33 | No | Show | 33 | C | -4.2045490 | -1.7425000 | -0.7708750 |
| 34 | No | Show | 34 | C | -3.8457470 | -0.3755980 | -3.1788230 |
| 35 | No | Show | 35 | H | -1.7736560 | -0.2396000 | -2.6192020 |
| 36 | No | Show | 36 | C | -5.2956400 | -1.4958130 | -1.6062040 |
| 37 | No | Show | 37 | H | -4.3567100 | -2.2682100 | 0.1675760  |
| 38 | No | Show | 38 | C | -5.1188590 | -0.8167650 | -2.8117070 |
| 39 | No | Show | 39 | H | -3.7017740 | 0.1651770  | -4.1105520 |
| 40 | No | Show | 40 | H | -6.2857530 | -1.8320750 | -1.3091150 |
| 41 | No | Show | 41 | H | -5.9708950 | -0.6221880 | -3.4578760 |
| 42 | No | Show | 42 | C | -2.0958720 | -2.1096790 | 1.5417700  |
| 43 | No | Show | 43 | C | -2.4506310 | -3.4381370 | 1.8188540  |
| 44 | No | Show | 44 | C | -2.2579710 | -1.1373220 | 2.5380760  |
| 45 | No | Show | 45 | C | -2.9678460 | -3.7828630 | 3.0676740  |
| 46 | No | Show | 46 | H | -2.3167670 | -4.2082550 | 1.0639270  |
| 47 | No | Show | 47 | C | -2.7821170 | -1.4842590 | 3.7826580  |
| 48 | No | Show | 48 | H | -1.9688830 | -0.1086460 | 2.3384840  |
| 49 | No | Show | 49 | C | -3.1373260 | -2.8069070 | 4.0508760  |
| 50 | No | Show | 50 | H | -3.2350710 | -4.8166780 | 3.2718930  |
| 51 | No | Show | 51 | H | -2.9042090 | -0.7195210 | 4.5453540  |
| 52 | No | Show | 52 | H | -3.5378340 | -3.0777390 | 5.0245360  |
| 53 | No | Show | 53 | C | -0.7796130 | -3.1849330 | -0.7781990 |
| 54 | No | Show | 54 | C | -1.4268650 | -3.8834700 | -1.8037180 |
| 55 | No | Show | 55 | C | 0.3955750  | -3.7167460 | -0.2279740 |
| 56 | No | Show | 56 | C | -0.9050010 | -5.0913400 | -2.2747060 |
| 57 | No | Show | 57 | H | -2.3388840 | -3.4918150 | -2.2440850 |
| 58 | No | Show | 58 | C | 0.9044920  | -4.9278180 | -0.6877770 |
| 59 | No | Show | 59 | H | 0.9186810  | -3.1780980 | 0.5575510  |
| 60 | No | Show | 60 | C | 0.2581780  | -5.6175960 | -1.7172390 |
| 61 | No | Show | 61 | H | -1.4132690 | -5.6169670 | -3.0791780 |
| 62 | No | Show | 62 | H | 1.8157690  | -5.3273420 | -0.2504180 |
| 63 | No | Show | 63 | H | 0.6648540  | -6.5563920 | -2.0846050 |
| 64 | No | Show | 64 | O | 4.5766930  | -1.3885620 | -0.9259370 |
| 65 | No | Show | 65 | C | -3.6856110 | 5.2437580  | 1.0500010  |
| 66 | No | Show | 66 | H | -3.4873110 | 5.6800590  | 2.0314700  |
| 67 | No | Show | 67 | H | -3.4430470 | 5.9938790  | 0.2927500  |
| 68 | No | Show | 68 | H | -4.7275010 | 4.9400160  | 0.9656860  |
| 69 | No | Show | 69 | C | 4.5061780  | -1.7361670 | 0.2482650  |
| 70 | No | Show | 70 | H | 1.1337950  | -0.9537750 | -0.2291420 |
| 71 | No | Show | 71 | O | 3.3793060  | -1.6050980 | 0.9897690  |
| 72 | No | Show | 72 | H | 2.6776110  | -1.2302490 | 0.4043250  |

---

|    |    |      |    |   |           |            |            |
|----|----|------|----|---|-----------|------------|------------|
| 73 | No | Show | 73 | N | 5.5346470 | -2.2867690 | 0.9545380  |
| 74 | No | Show | 74 | C | 6.8119160 | -2.4909200 | 0.3000960  |
| 75 | No | Show | 75 | H | 7.6020030 | -1.9305200 | 0.8151400  |
| 76 | No | Show | 76 | H | 7.0818630 | -3.5542340 | 0.3082140  |
| 77 | No | Show | 77 | H | 6.7430910 | -2.1478400 | -0.7307760 |
| 78 | No | Show | 78 | C | 5.4422250 | -2.6895080 | 2.3452720  |
| 79 | No | Show | 79 | H | 5.6441350 | -3.7633170 | 2.4471590  |
| 80 | No | Show | 80 | H | 6.1792120 | -2.1455510 | 2.9493710  |
| 81 | No | Show | 81 | H | 4.4487360 | -2.4804320 | 2.7339140  |

### 35b+32

| Row | Highlight |      | Display Tag | Symbol | X          | Y          | Z          |
|-----|-----------|------|-------------|--------|------------|------------|------------|
| 1   | No        | Show | 1           | C      | -1.7034580 | 2.8554230  | -0.1791510 |
| 2   | No        | Show | 2           | C      | -2.8143200 | 3.7549310  | 0.0865310  |
| 3   | No        | Show | 3           | C      | -1.8924740 | 1.5064790  | -0.4049770 |
| 4   | No        | Show | 4           | N      | -4.0646540 | 3.1338710  | 0.0009280  |
| 5   | No        | Show | 5           | C      | -3.2480170 | 1.0624190  | -0.4271240 |
| 6   | No        | Show | 6           | N      | -4.2921530 | 1.8377440  | -0.2469390 |
| 7   | No        | Show | 7           | Pd     | 0.0082030  | 0.5562760  | -0.4783310 |
| 8   | No        | Show | 8           | P      | -0.5829840 | -1.6071910 | -0.0083830 |
| 9   | No        | Show | 9           | O      | -2.7456030 | 4.9585050  | 0.3674490  |
| 10  | No        | Show | 10          | H      | -3.5075010 | 0.0244590  | -0.6135610 |
| 11  | No        | Show | 11          | C      | -2.0238180 | -2.1648620 | -0.9954630 |
| 12  | No        | Show | 12          | C      | -2.0321890 | -1.8686050 | -2.3669410 |
| 13  | No        | Show | 13          | C      | -3.0995750 | -2.8673930 | -0.4391590 |
| 14  | No        | Show | 14          | C      | -3.0907440 | -2.2856390 | -3.1707620 |
| 15  | No        | Show | 15          | H      | -1.2131900 | -1.3003320 | -2.8026840 |
| 16  | No        | Show | 16          | C      | -4.1643350 | -3.2741120 | -1.2459520 |
| 17  | No        | Show | 17          | H      | -3.1164650 | -3.0892940 | 0.6242190  |
| 18  | No        | Show | 18          | C      | -4.1604680 | -2.9885810 | -2.6111110 |
| 19  | No        | Show | 19          | H      | -3.0869550 | -2.0494610 | -4.2316340 |
| 20  | No        | Show | 20          | H      | -4.9993220 | -3.8103800 | -0.8023790 |
| 21  | No        | Show | 21          | H      | -4.9925860 | -3.3025860 | -3.2358700 |
| 22  | No        | Show | 22          | C      | -1.0650320 | -1.8456170 | 1.7467020  |
| 23  | No        | Show | 23          | C      | -0.9192820 | -3.0853070 | 2.3860480  |
| 24  | No        | Show | 24          | C      | -1.6020200 | -0.7655960 | 2.4603080  |
| 25  | No        | Show | 25          | C      | -1.3173270 | -3.2421490 | 3.7135130  |
| 26  | No        | Show | 26          | H      | -0.4892150 | -3.9280700 | 1.8516920  |
| 27  | No        | Show | 27          | C      | -2.0035410 | -0.9277510 | 3.7856800  |
| 28  | No        | Show | 28          | H      | -1.7001990 | 0.2039050  | 1.9785130  |
| 29  | No        | Show | 29          | C      | -1.8621830 | -2.1653390 | 4.4148330  |
| 30  | No        | Show | 30          | H      | -1.1968030 | -4.2067160 | 4.2001610  |
| 31  | No        | Show | 31          | H      | -2.4186830 | -0.0822800 | 4.3278910  |
| 32  | No        | Show | 32          | H      | -2.1683200 | -2.2888120 | 5.4505690  |
| 33  | No        | Show | 33          | C      | 0.6556390  | -2.9374420 | -0.2865390 |

---

|    |    |      |    |   |            |            |            |
|----|----|------|----|---|------------|------------|------------|
| 34 | No | Show | 34 | C | 0.3460380  | -4.1043940 | -0.9950520 |
| 35 | No | Show | 35 | C | 1.9370270  | -2.7907460 | 0.2627830  |
| 36 | No | Show | 36 | C | 1.3056460  | -5.1070080 | -1.1553640 |
| 37 | No | Show | 37 | H | -0.6416190 | -4.2390560 | -1.4260420 |
| 38 | No | Show | 38 | C | 2.8867660  | -3.7974920 | 0.1128250  |
| 39 | No | Show | 39 | H | 2.1978800  | -1.8842420 | 0.8017540  |
| 40 | No | Show | 40 | C | 2.5754000  | -4.9577220 | -0.6010060 |
| 41 | No | Show | 41 | H | 1.0547990  | -6.0038810 | -1.7160990 |
| 42 | No | Show | 42 | H | 3.8763030  | -3.6681020 | 0.5430220  |
| 43 | No | Show | 43 | H | 3.3221580  | -5.7373450 | -0.7284840 |
| 44 | No | Show | 44 | O | 4.7196080  | 1.1762920  | -1.5585280 |
| 45 | No | Show | 45 | C | -5.2426800 | 3.9633630  | 0.2184740  |
| 46 | No | Show | 46 | H | -5.1995720 | 4.4253400  | 1.2073510  |
| 47 | No | Show | 47 | H | -5.2820600 | 4.7626000  | -0.5257540 |
| 48 | No | Show | 48 | H | -6.1144370 | 3.3173710  | 0.1322230  |
| 49 | No | Show | 49 | C | 4.9640340  | 0.7714330  | -0.4267790 |
| 50 | No | Show | 50 | H | 1.5280060  | -0.0388920 | -0.5277600 |
| 51 | No | Show | 51 | O | 4.0046370  | 0.3205280  | 0.4170190  |
| 52 | No | Show | 52 | H | 3.1432970  | 0.3914860  | -0.0561820 |
| 53 | No | Show | 53 | N | 6.2118540  | 0.7147960  | 0.1211680  |
| 54 | No | Show | 54 | C | 7.3500730  | 1.1396810  | -0.6692450 |
| 55 | No | Show | 55 | H | 7.8655430  | 1.9776310  | -0.1834190 |
| 56 | No | Show | 56 | H | 8.0652860  | 0.3160960  | -0.7867850 |
| 57 | No | Show | 57 | H | 7.0037060  | 1.4544860  | -1.6521850 |
| 58 | No | Show | 58 | C | 6.4895940  | 0.2490140  | 1.4661350  |
| 59 | No | Show | 59 | H | 7.1464540  | -0.6299180 | 1.4405760  |
| 60 | No | Show | 60 | H | 6.9935110  | 1.0343280  | 2.0435270  |
| 61 | No | Show | 61 | H | 5.5651460  | -0.0165900 | 1.9729540  |
| 62 | No | Show | 62 | C | -0.3105440 | 3.3374180  | -0.1690700 |
| 63 | No | Show | 63 | C | 0.1880790  | 4.2571490  | 0.7644170  |
| 64 | No | Show | 64 | C | 0.5918790  | 2.7641230  | -1.1035510 |
| 65 | No | Show | 65 | C | 1.5488300  | 4.5554220  | 0.7899600  |
| 66 | No | Show | 66 | H | -0.4959810 | 4.7310370  | 1.4589050  |
| 67 | No | Show | 67 | C | 1.9636020  | 3.0664570  | -1.0619020 |
| 68 | No | Show | 68 | H | 0.1871810  | 2.2666930  | -1.9952200 |
| 69 | No | Show | 69 | C | 2.4426370  | 3.9538240  | -0.1043730 |
| 70 | No | Show | 70 | H | 1.9211770  | 5.2677600  | 1.5224250  |
| 71 | No | Show | 71 | H | 2.6440270  | 2.6162690  | -1.7784740 |
| 72 | No | Show | 72 | H | 3.5019850  | 4.1899160  | -0.0660080 |

### 36a

| Row | Highlight |      | Display Tag |   | Symbol | X         | Y          | Z          |
|-----|-----------|------|-------------|---|--------|-----------|------------|------------|
| 1   | No        | Show | 1           | H | -      | 2.9967190 | -3.3354530 | -1.5844560 |
| 2   | No        | Show | 2           | C | -      | 3.2751180 | -2.3441130 | -1.2510230 |
| 3   | No        | Show | 3           | C | -      | 4.5343340 | -1.9545590 | -0.7078640 |

---

|    |    |      |    |    |            |            |            |
|----|----|------|----|----|------------|------------|------------|
| 4  | No | Show | 4  | C  | -2.4646400 | -1.1708900 | -1.3476710 |
| 5  | No | Show | 5  | C  | -4.5012240 | -0.5532890 | -0.4392660 |
| 6  | No | Show | 6  | H  | -5.3647690 | -2.6182930 | -0.5000350 |
| 7  | No | Show | 7  | C  | -3.2216920 | -0.0575940 | -0.8268640 |
| 8  | No | Show | 8  | Fe | -3.0420500 | -1.5420560 | 0.6153690  |
| 9  | No | Show | 9  | C  | -3.6360720 | -1.1823340 | 2.5298250  |
| 10 | No | Show | 10 | C  | -2.2837700 | -0.7617900 | 2.3591550  |
| 11 | No | Show | 11 | C  | -3.7017480 | -2.5788310 | 2.2362300  |
| 12 | No | Show | 12 | H  | -4.4742030 | -0.5452170 | 2.7838700  |
| 13 | No | Show | 13 | C  | -1.5096600 | -1.8986500 | 1.9686030  |
| 14 | No | Show | 14 | H  | -1.9208010 | 0.2525140  | 2.4679480  |
| 15 | No | Show | 15 | C  | -2.3892330 | -3.0181240 | 1.8828670  |
| 16 | No | Show | 16 | H  | -4.5975220 | -3.1877200 | 2.2384230  |
| 17 | No | Show | 17 | H  | -0.4513170 | -1.9258320 | 1.7424200  |
| 18 | No | Show | 18 | H  | -2.1124470 | -4.0223570 | 1.5859530  |
| 19 | No | Show | 19 | H  | -1.5495000 | -1.1206700 | -1.9446760 |
| 20 | No | Show | 20 | H  | -5.2877030 | 0.0417190  | 0.0026010  |
| 21 | No | Show | 21 | C  | -2.6707590 | 1.2952670  | -0.7770430 |
| 22 | No | Show | 22 | C  | -3.5808620 | 2.4300560  | -0.8841480 |
| 23 | No | Show | 23 | C  | -1.3051120 | 1.4886340  | -0.6989760 |
| 24 | No | Show | 24 | N  | -2.9426430 | 3.6575950  | -1.0611390 |
| 25 | No | Show | 25 | C  | -0.8437880 | 2.8233560  | -0.9010080 |
| 26 | No | Show | 26 | N  | -1.6209410 | 3.8605500  | -1.0995320 |
| 27 | No | Show | 27 | Pd | -0.2273010 | -0.2306410 | -0.4077870 |
| 28 | No | Show | 28 | P  | 1.8031100  | 0.7154920  | 0.2288160  |
| 29 | No | Show | 29 | O  | -4.8158710 | 2.3812150  | -0.8361080 |
| 30 | No | Show | 30 | H  | 0.2119390  | 3.0687180  | -0.9328500 |
| 31 | No | Show | 31 | C  | 1.7329270  | 2.3852270  | 0.9878800  |
| 32 | No | Show | 32 | C  | 0.7197640  | 2.6485340  | 1.9215500  |
| 33 | No | Show | 33 | C  | 2.6676320  | 3.3858960  | 0.6964750  |
| 34 | No | Show | 34 | C  | 0.6533440  | 3.8822560  | 2.5649040  |
| 35 | No | Show | 35 | H  | -0.0277300 | 1.8886340  | 2.1358570  |
| 36 | No | Show | 36 | C  | 2.5920410  | 4.6256190  | 1.3336750  |
| 37 | No | Show | 37 | H  | 3.4519970  | 3.2081350  | -0.0335260 |
| 38 | No | Show | 38 | C  | 1.5895110  | 4.8752560  | 2.2705750  |
| 39 | No | Show | 39 | H  | -0.1390940 | 4.0727290  | 3.2838330  |
| 40 | No | Show | 40 | H  | 3.3185390  | 5.3973220  | 1.0924840  |
| 41 | No | Show | 41 | H  | 1.5308360  | 5.8430570  | 2.7616920  |
| 42 | No | Show | 42 | C  | 2.9046320  | 0.8822010  | -1.2230590 |
| 43 | No | Show | 43 | C  | 4.3016530  | 0.8784330  | -1.0985390 |
| 44 | No | Show | 44 | C  | 2.3301350  | 1.0519040  | -2.4897580 |
| 45 | No | Show | 45 | C  | 5.1061140  | 1.0522710  | -2.2238580 |
| 46 | No | Show | 46 | H  | 4.7623620  | 0.7328700  | -0.1253090 |
| 47 | No | Show | 47 | C  | 3.1376910  | 1.2318220  | -3.6122400 |
| 48 | No | Show | 48 | H  | 1.2480270  | 1.0339330  | -2.5972930 |

---

|    |    |      |    |   |            |            |            |
|----|----|------|----|---|------------|------------|------------|
| 49 | No | Show | 49 | C | 4.5266050  | 1.2321470  | -3.4811610 |
| 50 | No | Show | 50 | H | 6.1878270  | 1.0429130  | -2.1172500 |
| 51 | No | Show | 51 | H | 2.6797090  | 1.3605750  | -4.5893680 |
| 52 | No | Show | 52 | H | 5.1566900  | 1.3631220  | -4.3571570 |
| 53 | No | Show | 53 | C | 2.7748830  | -0.2398250 | 1.4586740  |
| 54 | No | Show | 54 | C | 2.9651390  | 0.2462000  | 2.7606470  |
| 55 | No | Show | 55 | C | 3.3520390  | -1.4676270 | 1.0935510  |
| 56 | No | Show | 56 | C | 3.7179690  | -0.4797550 | 3.6837960  |
| 57 | No | Show | 57 | H | 2.5423050  | 1.1982400  | 3.0646910  |
| 58 | No | Show | 58 | C | 4.1155370  | -2.1773140 | 2.0188240  |
| 59 | No | Show | 59 | H | 3.1961730  | -1.8865750 | 0.1034970  |
| 60 | No | Show | 60 | C | 4.2984670  | -1.6922320 | 3.3148280  |
| 61 | No | Show | 61 | H | 3.8553510  | -0.0879380 | 4.6884400  |
| 62 | No | Show | 62 | H | 4.5610400  | -3.1226800 | 1.7204440  |
| 63 | No | Show | 63 | H | 4.8907830  | -2.2550270 | 4.0322480  |
| 64 | No | Show | 64 | O | 0.8189350  | -2.0335930 | -0.2246360 |
| 65 | No | Show | 65 | C | -3.7820200 | 4.8353740  | -1.2380160 |
| 66 | No | Show | 66 | H | -4.4796810 | 4.6748200  | -2.0627630 |
| 67 | No | Show | 67 | H | -4.3654570 | 5.0230710  | -0.3331190 |
| 68 | No | Show | 68 | H | -3.1223840 | 5.6754060  | -1.4476960 |
| 69 | No | Show | 69 | C | 1.0438370  | -2.6984980 | -1.3901380 |
| 70 | No | Show | 70 | H | 1.3140970  | -2.0436970 | -2.2368930 |
| 71 | No | Show | 71 | O | -0.1654250 | -3.3652530 | -1.8348660 |
| 72 | No | Show | 72 | H | -0.6678260 | -3.4898210 | -1.0134830 |
| 73 | No | Show | 73 | N | 2.1585270  | -3.6312280 | -1.2370460 |
| 74 | No | Show | 74 | C | 1.9259180  | -4.6296650 | -0.2020470 |
| 75 | No | Show | 75 | H | 1.1500880  | -5.3648400 | -0.4785050 |
| 76 | No | Show | 76 | H | 2.8547560  | -5.1793770 | -0.0149990 |
| 77 | No | Show | 77 | H | 1.6288810  | -4.1292260 | 0.7219080  |
| 78 | No | Show | 78 | C | 2.5304650  | -4.2508810 | -2.5007980 |
| 79 | No | Show | 79 | H | 3.4535870  | -4.8247510 | -2.3646360 |
| 80 | No | Show | 80 | H | 1.7549190  | -4.9254150 | -2.8986980 |
| 81 | No | Show | 81 | H | 2.7264000  | -3.4765700 | -3.2498680 |

### 36b

| Row | Highlight |      | Display Tag |    | Symbol X   | Y          | Z          |
|-----|-----------|------|-------------|----|------------|------------|------------|
| 1   | No        | Show | 1           | C  | 3.1583980  | 0.5608990  | -0.2523500 |
| 2   | No        | Show | 2           | C  | 4.5056890  | 0.0431400  | -0.4321420 |
| 3   | No        | Show | 3           | C  | 2.0620170  | -0.1497920 | -0.6545930 |
| 4   | No        | Show | 4           | N  | 4.5486800  | -1.1595460 | -1.1457470 |
| 5   | No        | Show | 5           | C  | 2.2995540  | -1.3809980 | -1.3409770 |
| 6   | No        | Show | 6           | N  | 3.4947810  | -1.8486460 | -1.6018020 |
| 7   | No        | Show | 7           | Pd | 0.3446360  | 0.8212430  | -0.1882020 |
| 8   | No        | Show | 8           | P  | -0.9724470 | -1.0214370 | 0.2369980  |
| 9   | No        | Show | 9           | O  | 5.5487200  | 0.5590010  | -0.0200180 |

---

|    |    |      |    |   |            |            |            |
|----|----|------|----|---|------------|------------|------------|
| 10 | No | Show | 10 | H | 1.4926850  | -1.9980340 | -1.7254000 |
| 11 | No | Show | 11 | C | -0.0395760 | -2.5388590 | 0.6667030  |
| 12 | No | Show | 12 | C | 1.0610930  | -2.4154320 | 1.5280510  |
| 13 | No | Show | 13 | C | -0.3983640 | -3.8050070 | 0.1892420  |
| 14 | No | Show | 14 | C | 1.7739540  | -3.5444190 | 1.9257300  |
| 15 | No | Show | 15 | H | 1.3672590  | -1.4322350 | 1.8794840  |
| 16 | No | Show | 16 | C | 0.3255830  | -4.9322340 | 0.5808790  |
| 17 | No | Show | 17 | H | -1.2353090 | -3.9183230 | -0.4937260 |
| 18 | No | Show | 18 | C | 1.4075690  | -4.8058110 | 1.4520000  |
| 19 | No | Show | 19 | H | 2.6245840  | -3.4356830 | 2.5933080  |
| 20 | No | Show | 20 | H | 0.0430850  | -5.9099430 | 0.1991900  |
| 21 | No | Show | 21 | H | 1.9714490  | -5.6853950 | 1.7514820  |
| 22 | No | Show | 22 | C | -1.9659810 | -1.4447240 | -1.2386570 |
| 23 | No | Show | 23 | C | -3.1910400 | -2.1189970 | -1.1308190 |
| 24 | No | Show | 24 | C | -1.4719670 | -1.1196020 | -2.5090930 |
| 25 | No | Show | 25 | C | -3.9017430 | -2.4682090 | -2.2781650 |
| 26 | No | Show | 26 | H | -3.5948270 | -2.3647490 | -0.1524380 |
| 27 | No | Show | 27 | C | -2.1827940 | -1.4758490 | -3.6546070 |
| 28 | No | Show | 28 | H | -0.5327220 | -0.5789200 | -2.6018600 |
| 29 | No | Show | 29 | C | -3.3985150 | -2.1507120 | -3.5409370 |
| 30 | No | Show | 30 | H | -4.8529150 | -2.9855470 | -2.1832700 |
| 31 | No | Show | 31 | H | -1.7901070 | -1.2161230 | -4.6340670 |
| 32 | No | Show | 32 | H | -3.9571900 | -2.4207940 | -4.4333180 |
| 33 | No | Show | 33 | C | -2.1760570 | -0.8501570 | 1.6093040  |
| 34 | No | Show | 34 | C | -2.0278300 | -1.5912840 | 2.7907360  |
| 35 | No | Show | 35 | C | -3.2661790 | 0.0256080  | 1.4782250  |
| 36 | No | Show | 36 | C | -2.9570110 | -1.4664320 | 3.8235600  |
| 37 | No | Show | 37 | H | -1.1992410 | -2.2810220 | 2.9130360  |
| 38 | No | Show | 38 | C | -4.1962890 | 0.1319830  | 2.5101170  |
| 39 | No | Show | 39 | H | -3.3848640 | 0.6455890  | 0.5942490  |
| 40 | No | Show | 40 | C | -4.0460390 | -0.6070780 | 3.6846720  |
| 41 | No | Show | 41 | H | -2.8285650 | -2.0491120 | 4.7321830  |
| 42 | No | Show | 42 | H | -5.0373810 | 0.8104230  | 2.3938860  |
| 43 | No | Show | 43 | H | -4.7728030 | -0.5121670 | 4.4878210  |
| 44 | No | Show | 44 | O | -1.3837550 | 1.9199750  | 0.1518680  |
| 45 | No | Show | 45 | C | 5.8611790  | -1.7282340 | -1.4254880 |
| 46 | No | Show | 46 | H | 6.4840630  | -0.9914850 | -1.9371300 |
| 47 | No | Show | 47 | H | 6.3596530  | -2.0033680 | -0.4926550 |
| 48 | No | Show | 48 | H | 5.7088750  | -2.6064370 | -2.0501450 |
| 49 | No | Show | 49 | C | -2.0071490 | 2.3658050  | -0.9745050 |
| 50 | No | Show | 50 | H | -2.0162120 | 1.6379780  | -1.8049460 |
| 51 | No | Show | 51 | O | -1.3061630 | 3.5076770  | -1.5246170 |
| 52 | No | Show | 52 | H | -0.8776430 | 3.8974610  | -0.7462680 |
| 53 | No | Show | 53 | N | -3.4094000 | 2.6631870  | -0.6912380 |
| 54 | No | Show | 54 | C | -3.5757410 | 3.6681180  | 0.3508680  |

---

|    |    |      |    |   |            |           |            |
|----|----|------|----|---|------------|-----------|------------|
| 55 | No | Show | 55 | H | -3.2698720 | 4.6781720 | 0.0277230  |
| 56 | No | Show | 56 | H | -4.6308570 | 3.7159110 | 0.6421290  |
| 57 | No | Show | 57 | H | -2.9872050 | 3.3820330 | 1.2251690  |
| 58 | No | Show | 58 | C | -4.1494230 | 3.0119580 | -1.8952360 |
| 59 | No | Show | 59 | H | -5.2162590 | 3.0840120 | -1.6566180 |
| 60 | No | Show | 60 | H | -3.8266430 | 3.9668340 | -2.3416600 |
| 61 | No | Show | 61 | H | -4.0280740 | 2.2249610 | -2.6472510 |
| 62 | No | Show | 62 | C | 2.9624170  | 1.8691850 | 0.3714120  |
| 63 | No | Show | 63 | C | 3.5450260  | 2.2066400 | 1.6056120  |
| 64 | No | Show | 64 | C | 2.1624150  | 2.8192040 | -0.2927100 |
| 65 | No | Show | 65 | C | 3.3227570  | 3.4620680 | 2.1610370  |
| 66 | No | Show | 66 | H | 4.1728190  | 1.4885500 | 2.1105040  |
| 67 | No | Show | 67 | C | 1.9576140  | 4.0872840 | 0.2670440  |
| 68 | No | Show | 68 | H | 1.7720890  | 2.6053850 | -1.2854430 |
| 69 | No | Show | 69 | C | 2.5350750  | 4.4076940 | 1.4911050  |
| 70 | No | Show | 70 | H | 3.7752500  | 3.7139020 | 3.1114140  |
| 71 | No | Show | 71 | H | 1.3744040  | 4.8189830 | -0.2739360 |
| 72 | No | Show | 72 | H | 2.3852220  | 5.3907770 | 1.9183880  |

### 37

| Row | Highlight |      | Display Tag |    | Symbol X   | Y          | Z          |
|-----|-----------|------|-------------|----|------------|------------|------------|
| 1   | No        | Show | 1           | C  | 3.2492550  | -0.3952300 | -0.0244980 |
| 2   | No        | Show | 2           | C  | 4.5658590  | 0.2027920  | 0.0159230  |
| 3   | No        | Show | 3           | C  | 2.0777180  | 0.2838660  | -0.0302780 |
| 4   | No        | Show | 4           | N  | 4.4765740  | 1.6051470  | 0.0518940  |
| 5   | No        | Show | 5           | C  | 2.2071920  | 1.7062320  | 0.0036250  |
| 6   | No        | Show | 6           | N  | 3.3563980  | 2.3379320  | 0.0441540  |
| 7   | No        | Show | 7           | Pd | 0.5026560  | -1.1234560 | -0.0896330 |
| 8   | No        | Show | 8           | P  | -1.5928150 | -0.0399020 | -0.0063640 |
| 9   | No        | Show | 9           | O  | 5.6573430  | -0.3636230 | 0.0221220  |
| 10  | No        | Show | 10          | H  | 1.3378090  | 2.3583750  | -0.0089460 |
| 11  | No        | Show | 11          | C  | -1.6000050 | 1.5346210  | -0.9468040 |
| 12  | No        | Show | 12          | C  | -0.9330130 | 1.5610370  | -2.1808110 |
| 13  | No        | Show | 13          | C  | -2.2273360 | 2.6987550  | -0.4842290 |
| 14  | No        | Show | 14          | C  | -0.9130440 | 2.7244470  | -2.9479050 |
| 15  | No        | Show | 15          | H  | -0.4157480 | 0.6709190  | -2.5328290 |
| 16  | No        | Show | 16          | C  | -2.1952130 | 3.8663520  | -1.2490920 |
| 17  | No        | Show | 17          | H  | -2.7354190 | 2.7003040  | 0.4763680  |
| 18  | No        | Show | 18          | C  | -1.5430110 | 3.8806380  | -2.4823490 |
| 19  | No        | Show | 19          | H  | -0.3915220 | 2.7322530  | -3.9014620 |
| 20  | No        | Show | 20          | H  | -2.6785620 | 4.7661180  | -0.8768300 |
| 21  | No        | Show | 21          | H  | -1.5159750 | 4.7919970  | -3.0741350 |
| 22  | No        | Show | 22          | C  | -2.1194530 | 0.4286810  | 1.6878600  |
| 23  | No        | Show | 23          | C  | -3.4642930 | 0.4587000  | 2.0826960  |
| 24  | No        | Show | 24          | C  | -1.1260670 | 0.7698910  | 2.6176260  |

---

|    |    |      |    |    |            |            |            |
|----|----|------|----|----|------------|------------|------------|
| 25 | No | Show | 25 | C  | -3.8080170 | 0.8330170  | 3.3822940  |
| 26 | No | Show | 26 | H  | -4.2456330 | 0.1842270  | 1.3786860  |
| 27 | No | Show | 27 | C  | -1.4734240 | 1.1535920  | 3.9120870  |
| 28 | No | Show | 28 | H  | -0.0786290 | 0.7246490  | 2.3271630  |
| 29 | No | Show | 29 | C  | -2.8149500 | 1.1847250  | 4.2976850  |
| 30 | No | Show | 30 | H  | -4.8538900 | 0.8482490  | 3.6786700  |
| 31 | No | Show | 31 | H  | -0.6941610 | 1.4165930  | 4.6227100  |
| 32 | No | Show | 32 | H  | -3.0846010 | 1.4743980  | 5.3101050  |
| 33 | No | Show | 33 | C  | -3.0340310 | -0.9672270 | -0.6687980 |
| 34 | No | Show | 34 | C  | -3.9430120 | -0.4268490 | -1.5872630 |
| 35 | No | Show | 35 | C  | -3.2018600 | -2.2952770 | -0.2454360 |
| 36 | No | Show | 36 | C  | -5.0047080 | -1.1985720 | -2.0645690 |
| 37 | No | Show | 37 | H  | -3.8260710 | 0.5966750  | -1.9326430 |
| 38 | No | Show | 38 | C  | -4.2687210 | -3.0587220 | -0.7128420 |
| 39 | No | Show | 39 | H  | -2.4947990 | -2.7332630 | 0.4570310  |
| 40 | No | Show | 40 | C  | -5.1726220 | -2.5121500 | -1.6275030 |
| 41 | No | Show | 41 | H  | -5.7019880 | -0.7682990 | -2.7791430 |
| 42 | No | Show | 42 | H  | -4.3890540 | -4.0836860 | -0.3715300 |
| 43 | No | Show | 43 | H  | -5.9995300 | -3.1104480 | -2.0012390 |
| 44 | No | Show | 44 | Br | 3.1538580  | -2.3208720 | -0.0796500 |
| 45 | No | Show | 45 | C  | 5.7326980  | 2.3449540  | 0.0964290  |
| 46 | No | Show | 46 | H  | 6.3030950  | 2.0604720  | 0.9835770  |
| 47 | No | Show | 47 | H  | 6.3355470  | 2.1119920  | -0.7843170 |
| 48 | No | Show | 48 | H  | 5.4849620  | 3.4042730  | 0.1226790  |

### 37 (L=NHC)

| Row | Highlight | Display | Tag | Symbol | X          | Y          | Z          |
|-----|-----------|---------|-----|--------|------------|------------|------------|
| 1   | No        | Show    | 1   | C      | -2.6104110 | -0.0412760 | -0.8583540 |
| 2   | No        | Show    | 2   | C      | -3.1604330 | -0.0423210 | -2.1848910 |
| 3   | No        | Show    | 3   | C      | -3.5478320 | -0.0486320 | 0.1286980  |
| 4   | No        | Show    | 4   | C      | -4.9832880 | -0.0559730 | -0.0928150 |
| 5   | No        | Show    | 5   | N      | -5.3029800 | -0.0553420 | -1.4577490 |
| 6   | No        | Show    | 6   | H      | -2.5127190 | -0.0373540 | -3.0587630 |
| 7   | No        | Show    | 7   | N      | -4.4369510 | -0.0489740 | -2.4787180 |
| 8   | No        | Show    | 8   | O      | -5.8761490 | -0.0623760 | 0.7550720  |
| 9   | No        | Show    | 9   | C      | 1.4967710  | 0.0210590  | -0.0087350 |
| 10  | No        | Show    | 10  | Pd     | -0.5864660 | -0.0205590 | -0.4299490 |
| 11  | No        | Show    | 11  | C      | 3.6303280  | 0.7361530  | 0.3484690  |
| 12  | No        | Show    | 12  | C      | 3.6539170  | -0.6212580 | 0.3459500  |
| 13  | No        | Show    | 13  | N      | 2.3486950  | -1.0363620 | 0.1286670  |
| 14  | No        | Show    | 14  | N      | 2.3113640  | 1.1066290  | 0.1324940  |
| 15  | No        | Show    | 15  | C      | 1.9480030  | -2.4176390 | 0.0504260  |
| 16  | No        | Show    | 16  | C      | 1.9073050  | -3.0381410 | -1.2119180 |
| 17  | No        | Show    | 17  | C      | 1.6349350  | -3.0977660 | 1.2418930  |
| 18  | No        | Show    | 18  | C      | 1.5323050  | -4.3849730 | -1.2569910 |



---

|    |    |      |    |   |            |            |            |
|----|----|------|----|---|------------|------------|------------|
| 19 | No | Show | 19 | C | 1.2723050  | -4.4449800 | 1.1389250  |
| 20 | No | Show | 20 | C | 1.2193260  | -5.0834680 | -0.0956130 |
| 21 | No | Show | 21 | H | 1.4820500  | -4.8950210 | -2.2155020 |
| 22 | No | Show | 22 | H | 1.0203050  | -5.0011590 | 2.0381040  |
| 23 | No | Show | 23 | H | 0.9283870  | -6.1294220 | -0.1532410 |
| 24 | No | Show | 24 | C | 1.8628570  | 2.4735240  | 0.0588420  |
| 25 | No | Show | 25 | C | 1.5212170  | 3.1367440  | 1.2519550  |
| 26 | No | Show | 26 | C | 1.8042280  | 3.0974990  | -1.2009880 |
| 27 | No | Show | 27 | C | 1.1074180  | 4.4693710  | 1.1528730  |
| 28 | No | Show | 28 | C | 1.3775790  | 4.4290090  | -1.2423630 |
| 29 | No | Show | 29 | C | 1.0334850  | 5.1101080  | -0.0794520 |
| 30 | No | Show | 30 | H | 0.8313320  | 5.0117270  | 2.0534080  |
| 31 | No | Show | 31 | H | 1.3112560  | 4.9402960  | -2.1991790 |
| 32 | No | Show | 32 | H | 0.7025710  | 6.1442740  | -0.1340420 |
| 33 | No | Show | 33 | H | 4.4687720  | -1.3179980 | 0.4754560  |
| 34 | No | Show | 34 | H | 4.4202140  | 1.4605980  | 0.4806100  |
| 35 | No | Show | 35 | C | 2.2458770  | -2.3069820 | -2.5010910 |
| 36 | No | Show | 36 | H | 2.5281650  | -1.2820120 | -2.2455350 |
| 37 | No | Show | 37 | C | 1.6817320  | -2.4303630 | 2.6070450  |
| 38 | No | Show | 38 | H | 1.9058630  | -1.3701330 | 2.4593200  |
| 39 | No | Show | 39 | C | 1.0261410  | -2.2214430 | -3.4296750 |
| 40 | No | Show | 40 | H | 1.2686990  | -1.6409380 | -4.3261440 |
| 41 | No | Show | 41 | H | 0.6967810  | -3.2136150 | -3.7554220 |
| 42 | No | Show | 42 | H | 0.1828400  | -1.7374840 | -2.9269460 |
| 43 | No | Show | 43 | C | 3.4465420  | -2.9452370 | -3.2150380 |
| 44 | No | Show | 44 | H | 3.7164740  | -2.3610340 | -4.1012860 |
| 45 | No | Show | 45 | H | 4.3227150  | -2.9920340 | -2.5606160 |
| 46 | No | Show | 46 | H | 3.2249940  | -3.9645440 | -3.5476010 |
| 47 | No | Show | 47 | C | 0.3258980  | -2.5077640 | 3.3230580  |
| 48 | No | Show | 48 | H | 0.3653770  | -1.9511870 | 4.2654280  |
| 49 | No | Show | 49 | H | -0.4732860 | -2.0820720 | 2.7105300  |
| 50 | No | Show | 50 | H | 0.0530540  | -3.5403330 | 3.5641110  |
| 51 | No | Show | 51 | C | 2.8032800  | -3.0195710 | 3.4764430  |
| 52 | No | Show | 52 | H | 3.7798740  | -2.9306360 | 2.9896740  |
| 53 | No | Show | 53 | H | 2.8553220  | -2.4963820 | 4.4371690  |
| 54 | No | Show | 54 | H | 2.6319670  | -4.0808130 | 3.6850330  |
| 55 | No | Show | 55 | C | 1.5925490  | 2.4670730  | 2.6147420  |
| 56 | No | Show | 56 | H | 1.8529580  | 1.4157140  | 2.4632120  |
| 57 | No | Show | 57 | C | 2.1736470  | 2.3840440  | -2.4916040 |
| 58 | No | Show | 58 | H | 2.5232350  | 1.3799040  | -2.2360520 |
| 59 | No | Show | 59 | C | 3.3231970  | 3.0919220  | -3.2237350 |
| 60 | No | Show | 60 | H | 3.0330270  | 4.0903970  | -3.5663340 |
| 61 | No | Show | 61 | H | 4.2001680  | 3.2032240  | -2.5782480 |
| 62 | No | Show | 62 | H | 3.6225920  | 2.5160540  | -4.1059030 |
| 63 | No | Show | 63 | C | 0.9494600  | 2.2185450  | -3.4035750 |

---

|    |    |      |    |    |            |            |            |
|----|----|------|----|----|------------|------------|------------|
| 64 | No | Show | 64 | H  | 0.5497660  | 3.1875530  | -3.7202140 |
| 65 | No | Show | 65 | H  | 1.2172550  | 1.6576630  | -4.3053890 |
| 66 | No | Show | 66 | H  | 0.1476920  | 1.6782220  | -2.8901310 |
| 67 | No | Show | 67 | C  | 0.2362480  | 2.4950040  | 3.3334580  |
| 68 | No | Show | 68 | H  | -0.5487500 | 2.0437690  | 2.7208860  |
| 69 | No | Show | 69 | H  | 0.2969680  | 1.9369040  | 4.2738060  |
| 70 | No | Show | 70 | H  | -0.0720430 | 3.5165370  | 3.5787850  |
| 71 | No | Show | 71 | C  | 2.6946140  | 3.0922590  | 3.4840970  |
| 72 | No | Show | 72 | H  | 3.6727600  | 3.0392720  | 2.9951920  |
| 73 | No | Show | 73 | H  | 2.4865730  | 4.1461740  | 3.6964610  |
| 74 | No | Show | 74 | H  | 2.7668480  | 2.5680520  | 4.4429620  |
| 75 | No | Show | 75 | Br | -3.0174010 | -0.0499140 | 1.9694190  |
| 76 | No | Show | 76 | C  | -6.7173590 | -0.0626560 | -1.8080900 |
| 77 | No | Show | 77 | H  | -7.2021450 | -0.9500410 | -1.3942490 |
| 78 | No | Show | 78 | H  | -7.2119210 | 0.8181910  | -1.3918460 |
| 79 | No | Show | 79 | H  | -6.7822660 | -0.0615300 | -2.8946300 |

### 37\*\*

| Row | Highlight | Display | Tag | Symbol | X          | Y          | Z          |
|-----|-----------|---------|-----|--------|------------|------------|------------|
| 1   | No        | Show    | 1   | C      | -2.2450480 | -1.4159430 | 0.8427980  |
| 2   | No        | Show    | 2   | C      | -2.8059150 | -1.4079910 | 2.1641580  |
| 3   | No        | Show    | 3   | C      | -3.0743100 | -1.9106210 | -0.1182570 |
| 4   | No        | Show    | 4   | N      | -4.0009410 | -1.8385670 | 2.4845370  |
| 5   | No        | Show    | 5   | C      | -4.4146850 | -2.4130080 | 0.1399780  |
| 6   | No        | Show    | 6   | N      | -4.7640400 | -2.3211040 | 1.4954660  |
| 7   | No        | Show    | 7   | Pd     | -0.2686710 | -0.8158530 | 0.4704220  |
| 8   | No        | Show    | 8   | P      | -0.8025330 | 1.5061780  | 0.0166420  |
| 9   | No        | Show    | 9   | C      | -2.4189750 | 1.9315240  | -0.7411700 |
| 10  | No        | Show    | 10  | C      | -3.5884420 | 1.6660090  | -0.0121030 |
| 11  | No        | Show    | 11  | C      | -2.5298340 | 2.4618610  | -2.0325340 |
| 12  | No        | Show    | 12  | C      | -4.8390810 | 1.9369020  | -0.5611020 |
| 13  | No        | Show    | 13  | H      | -3.5245250 | 1.2489400  | 0.9894610  |
| 14  | No        | Show    | 14  | C      | -3.7854310 | 2.7256090  | -2.5823480 |
| 15  | No        | Show    | 15  | H      | -1.6381530 | 2.6767480  | -2.6140890 |
| 16  | No        | Show    | 16  | C      | -4.9425940 | 2.4649190  | -1.8498790 |
| 17  | No        | Show    | 17  | H      | -5.7356260 | 1.7243860  | 0.0155340  |
| 18  | No        | Show    | 18  | H      | -3.8557190 | 3.1356150  | -3.5869020 |
| 19  | No        | Show    | 19  | H      | -5.9199920 | 2.6657570  | -2.2809350 |
| 20  | No        | Show    | 20  | C      | -0.8023200 | 2.5483880  | 1.5320920  |
| 21  | No        | Show    | 21  | C      | -1.3072620 | 3.8571530  | 1.5347030  |
| 22  | No        | Show    | 22  | C      | -0.3088190 | 2.0094350  | 2.7266890  |
| 23  | No        | Show    | 23  | C      | -1.2901400 | 4.6180100  | 2.7024460  |
| 24  | No        | Show    | 24  | H      | -1.7323430 | 4.2758740  | 0.6257750  |
| 25  | No        | Show    | 25  | C      | -0.2925470 | 2.7707940  | 3.8967340  |
| 26  | No        | Show    | 26  | H      | 0.0477050  | 0.9805970  | 2.7399080  |

---

|    |    |      |    |    |            |            |            |
|----|----|------|----|----|------------|------------|------------|
| 27 | No | Show | 27 | C  | -0.7785950 | 4.0781420  | 3.8851230  |
| 28 | No | Show | 28 | H  | -1.6856410 | 5.6307570  | 2.6918520  |
| 29 | No | Show | 29 | H  | 0.0890760  | 2.3372850  | 4.8178210  |
| 30 | No | Show | 30 | H  | -0.7728830 | 4.6705280  | 4.7966290  |
| 31 | No | Show | 31 | O  | -5.2134950 | -2.8798490 | -0.6719980 |
| 32 | No | Show | 32 | H  | -2.2371070 | -1.0276440 | 3.0092940  |
| 33 | No | Show | 33 | H  | 2.4622400  | 4.6366650  | -2.3767160 |
| 34 | No | Show | 34 | C  | 1.8454830  | 3.7717320  | -2.1630700 |
| 35 | No | Show | 35 | C  | 1.8223930  | 2.5532120  | -2.9064770 |
| 36 | No | Show | 36 | C  | 0.9634640  | 3.6316120  | -1.0504330 |
| 37 | No | Show | 37 | C  | 0.9326480  | 1.6543960  | -2.2505120 |
| 38 | No | Show | 38 | H  | 2.4170480  | 2.3292070  | -3.7837870 |
| 39 | No | Show | 39 | C  | 0.3865800  | 2.3168910  | -1.0960510 |
| 40 | No | Show | 40 | Fe | 2.4177050  | 2.2057760  | -0.9773780 |
| 41 | No | Show | 41 | C  | 4.0201020  | 0.9433090  | -1.0007220 |
| 42 | No | Show | 42 | C  | 3.0981580  | 0.5757240  | 0.0365290  |
| 43 | No | Show | 43 | C  | 4.4522230  | 2.2818500  | -0.7608200 |
| 44 | No | Show | 44 | H  | 4.2951760  | 0.3252160  | -1.8458360 |
| 45 | No | Show | 45 | C  | 2.9692770  | 1.7093870  | 0.9129780  |
| 46 | No | Show | 46 | C  | 3.8095560  | 2.7511420  | 0.4242520  |
| 47 | No | Show | 47 | H  | 5.1176290  | 2.8552830  | -1.3950450 |
| 48 | No | Show | 48 | H  | 2.3214230  | 1.7735090  | 1.7777960  |
| 49 | No | Show | 49 | H  | 3.8999710  | 3.7432010  | 0.8500420  |
| 50 | No | Show | 50 | H  | 0.7981680  | 4.3671120  | -0.2735230 |
| 51 | No | Show | 51 | H  | 0.7227160  | 0.6330990  | -2.5443070 |
| 52 | No | Show | 52 | P  | 2.1430820  | -0.9608370 | 0.2331180  |
| 53 | No | Show | 53 | C  | 2.6684310  | -1.9821090 | -1.2035940 |
| 54 | No | Show | 54 | C  | 3.9789780  | -2.4633350 | -1.3387480 |
| 55 | No | Show | 55 | C  | 1.7169180  | -2.3113350 | -2.1767530 |
| 56 | No | Show | 56 | C  | 4.3340280  | -3.2397480 | -2.4402420 |
| 57 | No | Show | 57 | H  | 4.7211340  | -2.2431380 | -0.5751480 |
| 58 | No | Show | 58 | C  | 2.0739440  | -3.0884530 | -3.2803770 |
| 59 | No | Show | 59 | H  | 0.6868950  | -1.9794100 | -2.0599160 |
| 60 | No | Show | 60 | C  | 3.3827600  | -3.5500720 | -3.4157080 |
| 61 | No | Show | 61 | H  | 5.3517920  | -3.6107490 | -2.5334440 |
| 62 | No | Show | 62 | H  | 1.3235760  | -3.3426300 | -4.0245330 |
| 63 | No | Show | 63 | H  | 3.6598030  | -4.1614440 | -4.2708910 |
| 64 | No | Show | 64 | C  | 2.9880540  | -1.7899530 | 1.6437530  |
| 65 | No | Show | 65 | C  | 4.1897820  | -1.3306560 | 2.1970840  |
| 66 | No | Show | 66 | C  | 2.3819290  | -2.9333080 | 2.1855860  |
| 67 | No | Show | 67 | C  | 4.7772190  | -2.0057360 | 3.2687500  |
| 68 | No | Show | 68 | H  | 4.6694840  | -0.4422710 | 1.7954610  |
| 69 | No | Show | 69 | C  | 2.9748430  | -3.6118730 | 3.2484490  |
| 70 | No | Show | 70 | H  | 1.4406220  | -3.2928540 | 1.7732820  |
| 71 | No | Show | 71 | C  | 4.1738420  | -3.1478890 | 3.7949970  |

---

|    |    |      |    |    |            |            |            |
|----|----|------|----|----|------------|------------|------------|
| 72 | No | Show | 72 | H  | 5.7088370  | -1.6370140 | 3.6912430  |
| 73 | No | Show | 73 | H  | 2.4958590  | -4.4986350 | 3.6557490  |
| 74 | No | Show | 74 | H  | 4.6319580  | -3.6723820 | 4.6296930  |
| 75 | No | Show | 75 | C  | -6.0860990 | -2.8022360 | 1.8744490  |
| 76 | No | Show | 76 | H  | -6.1864070 | -3.8613190 | 1.6249890  |
| 77 | No | Show | 77 | H  | -6.1914910 | -2.6500020 | 2.9471510  |
| 78 | No | Show | 78 | H  | -6.8575200 | -2.2530230 | 1.3294900  |
| 79 | No | Show | 79 | Br | -2.5329620 | -2.0086930 | -1.9496580 |

### 38

| Row | Highlight |      | Display | Tag | Symbol     | X          | Y          | Z |
|-----|-----------|------|---------|-----|------------|------------|------------|---|
| 1   | No        | Show | 1       | C   | -2.3418280 | 0.1461110  | -0.2175150 |   |
| 2   | No        | Show | 2       | C   | -2.4610020 | 1.5964920  | -0.2016670 |   |
| 3   | No        | Show | 3       | C   | -3.5002760 | -0.5401800 | -0.0867780 |   |
| 4   | No        | Show | 4       | N   | -3.7660240 | 2.0887700  | -0.0052750 |   |
| 5   | No        | Show | 5       | C   | -4.7735710 | 0.0645280  | 0.0855600  |   |
| 6   | No        | Show | 6       | N   | -4.8844510 | 1.3654260  | 0.1281740  |   |
| 7   | No        | Show | 7       | Pd  | -0.6683590 | -1.0982970 | -0.4016310 |   |
| 8   | No        | Show | 8       | P   | 1.4286470  | -0.0303290 | -0.0285130 |   |
| 9   | No        | Show | 9       | O   | -1.5410460 | 2.4100300  | -0.3439090 |   |
| 10  | No        | Show | 10      | H   | -5.6929200 | -0.5034710 | 0.1915490  |   |
| 11  | No        | Show | 11      | C   | 1.4919450  | 1.0392190  | 1.4553840  |   |
| 12  | No        | Show | 12      | C   | 0.6450760  | 0.7384360  | 2.5298820  |   |
| 13  | No        | Show | 13      | C   | 2.3653550  | 2.1297810  | 1.5541820  |   |
| 14  | No        | Show | 14      | C   | 0.6870490  | 1.5020660  | 3.6955890  |   |
| 15  | No        | Show | 15      | H   | -0.0570410 | -0.0885770 | 2.4458040  |   |
| 16  | No        | Show | 16      | C   | 2.3985030  | 2.8987090  | 2.7175160  |   |
| 17  | No        | Show | 17      | H   | 3.0142940  | 2.3849010  | 0.7205690  |   |
| 18  | No        | Show | 18      | C   | 1.5637190  | 2.5842000  | 3.7910820  |   |
| 19  | No        | Show | 19      | H   | 0.0249370  | 1.2601820  | 4.5230600  |   |
| 20  | No        | Show | 20      | H   | 3.0749620  | 3.7472910  | 2.7825920  |   |
| 21  | No        | Show | 21      | H   | 1.5888610  | 3.1872490  | 4.6952850  |   |
| 22  | No        | Show | 22      | C   | 2.1158820  | 1.0022410  | -1.3777370 |   |
| 23  | No        | Show | 23      | C   | 3.4165490  | 0.8428230  | -1.8745620 |   |
| 24  | No        | Show | 24      | C   | 1.2790280  | 1.9856960  | -1.9284440 |   |
| 25  | No        | Show | 25      | C   | 3.8749450  | 1.6557540  | -2.9129840 |   |
| 26  | No        | Show | 26      | H   | 4.0765790  | 0.0888670  | -1.4542980 |   |
| 27  | No        | Show | 27      | C   | 1.7488940  | 2.8001430  | -2.9575570 |   |
| 28  | No        | Show | 28      | H   | 0.2716760  | 2.1209430  | -1.5376150 |   |
| 29  | No        | Show | 29      | C   | 3.0432540  | 2.6353030  | -3.4560870 |   |
| 30  | No        | Show | 30      | H   | 4.8848270  | 1.5229240  | -3.2933950 |   |
| 31  | No        | Show | 31      | H   | 1.0963750  | 3.5633350  | -3.3742180 |   |
| 32  | No        | Show | 32      | H   | 3.4021760  | 3.2673520  | -4.2647020 |   |
| 33  | No        | Show | 33      | C   | 2.7220360  | -1.3044610 | 0.2673650  |   |
| 34  | No        | Show | 34      | C   | 3.5691510  | -1.2947910 | 1.3824180  |   |

---

|    |    |      |    |    |            |            |            |
|----|----|------|----|----|------------|------------|------------|
| 35 | No | Show | 35 | C  | 2.8227100  | -2.3622900 | -0.6517420 |
| 36 | No | Show | 36 | C  | 4.5034650  | -2.3159040 | 1.5685860  |
| 37 | No | Show | 37 | H  | 3.5020150  | -0.4904740 | 2.1094840  |
| 38 | No | Show | 38 | C  | 3.7637300  | -3.3732370 | -0.4710620 |
| 39 | No | Show | 39 | H  | 2.1653920  | -2.3904460 | -1.5196970 |
| 40 | No | Show | 40 | C  | 4.6061750  | -3.3542810 | 0.6434730  |
| 41 | No | Show | 41 | H  | 5.1526990  | -2.2960690 | 2.4404170  |
| 42 | No | Show | 42 | H  | 3.8334490  | -4.1807550 | -1.1954970 |
| 43 | No | Show | 43 | H  | 5.3339920  | -4.1480140 | 0.7909570  |
| 44 | No | Show | 44 | C  | -3.9383220 | 3.5363810  | 0.0350860  |
| 45 | No | Show | 45 | H  | -3.3085610 | 3.9634810  | 0.8184080  |
| 46 | No | Show | 46 | H  | -3.6377380 | 3.9767610  | -0.9187110 |
| 47 | No | Show | 47 | H  | -4.9898180 | 3.7358870  | 0.2334520  |
| 48 | No | Show | 48 | Br | -3.4044130 | -2.4823090 | -0.1411340 |

### 38 (L=NHC)

| Row | Highlight |      | Display Tag |    | Symbol X   | Y          | Z          |
|-----|-----------|------|-------------|----|------------|------------|------------|
| 1   | No        | Show | 1           | C  | 3.7126190  | -0.4008850 | -0.6711840 |
| 2   | No        | Show | 2           | C  | 5.1045140  | -0.3305720 | -0.3717110 |
| 3   | No        | Show | 3           | C  | 2.7453560  | -0.0348340 | 0.2070250  |
| 4   | No        | Show | 4           | C  | 3.2299740  | 0.4386440  | 1.4974890  |
| 5   | No        | Show | 5           | N  | 4.6147390  | 0.4692370  | 1.6839780  |
| 6   | No        | Show | 6           | H  | 5.8682310  | -0.6266390 | -1.0847550 |
| 7   | No        | Show | 7           | N  | 5.5370250  | 0.0972630  | 0.7831760  |
| 8   | No        | Show | 8           | O  | 2.4898400  | 0.8095810  | 2.4257670  |
| 9   | No        | Show | 9           | C  | -1.4305810 | 0.0769630  | 0.0456500  |
| 10  | No        | Show | 10          | Pd | 0.6838440  | -0.0060140 | 0.0696010  |
| 11  | No        | Show | 11          | C  | -3.5670780 | 0.8604350  | -0.0126010 |
| 12  | No        | Show | 12          | C  | -3.6307560 | -0.4707230 | 0.2496260  |
| 13  | No        | Show | 13          | N  | -2.3219490 | -0.9281320 | 0.2796760  |
| 14  | No        | Show | 14          | N  | -2.2214850 | 1.1731920  | -0.1326080 |
| 15  | No        | Show | 15          | C  | -1.9446870 | -2.2946190 | 0.5336250  |
| 16  | No        | Show | 16          | C  | -1.6559590 | -2.6815600 | 1.8554850  |
| 17  | No        | Show | 17          | C  | -1.8888570 | -3.1897180 | -0.5506580 |
| 18  | No        | Show | 18          | C  | -1.2984910 | -4.0169640 | 2.0708590  |
| 19  | No        | Show | 19          | C  | -1.5307190 | -4.5137770 | -0.2769500 |
| 20  | No        | Show | 20          | C  | -1.2370310 | -4.9250410 | 1.0191060  |
| 21  | No        | Show | 21          | H  | -1.0615260 | -4.3501270 | 3.0778980  |
| 22  | No        | Show | 22          | H  | -1.4736640 | -5.2316920 | -1.0911480 |
| 23  | No        | Show | 23          | H  | -0.9544490 | -5.9574950 | 1.2097930  |
| 24  | No        | Show | 24          | C  | -1.7137090 | 2.4950920  | -0.3972530 |
| 25  | No        | Show | 25          | C  | -1.4887280 | 2.8758740  | -1.7330410 |
| 26  | No        | Show | 26          | C  | -1.4662760 | 3.3521460  | 0.6911300  |
| 27  | No        | Show | 27          | C  | -1.0005040 | 4.1665210  | -1.9616370 |
| 28  | No        | Show | 28          | C  | -0.9785730 | 4.6315750  | 0.4042960  |

---

|    |    |      |    |   |            |            |            |
|----|----|------|----|---|------------|------------|------------|
| 29 | No | Show | 29 | C | -0.7478550 | 5.0367910  | -0.9061270 |
| 30 | No | Show | 30 | H | -0.8078710 | 4.4929320  | -2.9804000 |
| 31 | No | Show | 31 | H | -0.7692670 | 5.3180650  | 1.2204070  |
| 32 | No | Show | 32 | H | -0.3642240 | 6.0343690  | -1.1058190 |
| 33 | No | Show | 33 | H | -4.4756110 | -1.1225500 | 0.4158730  |
| 34 | No | Show | 34 | H | -4.3451020 | 1.6015100  | -0.1210170 |
| 35 | No | Show | 35 | C | -1.7215660 | -1.7200240 | 3.0312080  |
| 36 | No | Show | 36 | H | -2.0131710 | -0.7372460 | 2.6506570  |
| 37 | No | Show | 37 | C | -2.1881790 | -2.7686710 | -1.9805800 |
| 38 | No | Show | 38 | H | -2.4407600 | -1.7046890 | -1.9754110 |
| 39 | No | Show | 39 | C | -0.3516220 | -1.5546050 | 3.7045690  |
| 40 | No | Show | 40 | H | -0.4174550 | -0.8276860 | 4.5205870  |
| 41 | No | Show | 41 | H | 0.0031720  | -2.4994010 | 4.1302480  |
| 42 | No | Show | 42 | H | 0.4035730  | -1.1932270 | 3.0011700  |
| 43 | No | Show | 43 | C | -2.7934730 | -2.1509230 | 4.0442200  |
| 44 | No | Show | 44 | H | -2.8722400 | -1.4130540 | 4.8497480  |
| 45 | No | Show | 45 | H | -3.7776200 | -2.2445630 | 3.5735490  |
| 46 | No | Show | 46 | H | -2.5512850 | -3.1152150 | 4.5030610  |
| 47 | No | Show | 47 | C | -0.9566980 | -2.9346100 | -2.8829030 |
| 48 | No | Show | 48 | H | -1.1757060 | -2.5714160 | -3.8928050 |
| 49 | No | Show | 49 | H | -0.1020150 | -2.3723410 | -2.4966950 |
| 50 | No | Show | 50 | H | -0.6569760 | -3.9843920 | -2.9669140 |
| 51 | No | Show | 51 | C | -3.4007850 | -3.5215900 | -2.5481420 |
| 52 | No | Show | 52 | H | -4.2878540 | -3.3835550 | -1.9216060 |
| 53 | No | Show | 53 | H | -3.6366590 | -3.1590630 | -3.5543310 |
| 54 | No | Show | 54 | H | -3.2099810 | -4.5972820 | -2.6210820 |
| 55 | No | Show | 55 | C | -1.7388730 | 1.9439560  | -2.9076130 |
| 56 | No | Show | 56 | H | -2.1327590 | 1.0021630  | -2.5154770 |
| 57 | No | Show | 57 | C | -1.7131830 | 2.9440090  | 2.1346570  |
| 58 | No | Show | 58 | H | -2.0512460 | 1.9038820  | 2.1396320  |
| 59 | No | Show | 59 | C | -2.8319440 | 3.7888840  | 2.7641180  |
| 60 | No | Show | 60 | H | -2.5477780 | 4.8442430  | 2.8329090  |
| 61 | No | Show | 61 | H | -3.7575550 | 3.7317950  | 2.1818510  |
| 62 | No | Show | 62 | H | -3.0475830 | 3.4378560  | 3.7789020  |
| 63 | No | Show | 63 | C | -0.4288950 | 3.0055560  | 2.9745000  |
| 64 | No | Show | 64 | H | -0.0414930 | 4.0280560  | 3.0401130  |
| 65 | No | Show | 65 | H | -0.6353560 | 2.6686270  | 3.9961890  |
| 66 | No | Show | 66 | H | 0.3603700  | 2.3687890  | 2.5657140  |
| 67 | No | Show | 67 | C | -0.4321300 | 1.6153440  | -3.6446190 |
| 68 | No | Show | 68 | H | 0.3083160  | 1.1793110  | -2.9675620 |
| 69 | No | Show | 69 | H | -0.6203200 | 0.8977250  | -4.4503740 |
| 70 | No | Show | 70 | H | 0.0111340  | 2.5099510  | -4.0946060 |
| 71 | No | Show | 71 | C | -2.7928490 | 2.5120700  | -3.8696400 |
| 72 | No | Show | 72 | H | -3.7329150 | 2.7294430  | -3.3525620 |
| 73 | No | Show | 73 | H | -2.4515880 | 3.4383300  | -4.3432460 |

---

|    |    |      |    |    |            |            |            |
|----|----|------|----|----|------------|------------|------------|
| 74 | No | Show | 74 | H  | -3.0035350 | 1.7925370  | -4.6679880 |
| 75 | No | Show | 75 | Br | 3.2616480  | -1.0575520 | -2.4311410 |
| 76 | No | Show | 76 | C  | 5.1246070  | 0.9428340  | 2.9636210  |
| 77 | No | Show | 77 | H  | 4.7876340  | 1.9662310  | 3.1453190  |
| 78 | No | Show | 78 | H  | 4.7475510  | 0.3139800  | 3.7738000  |
| 79 | No | Show | 79 | H  | 6.2116020  | 0.8997430  | 2.9198340  |

### 38\*\*

| Row | Highlight |      | Display | Tag | Symbol     | X          | Y          | Z |
|-----|-----------|------|---------|-----|------------|------------|------------|---|
| 1   | No        | Show | 1       | C   | -3.0646870 | -2.3127660 | 0.5495520  |   |
| 2   | No        | Show | 2       | C   | -4.2856110 | -2.8681270 | 0.0716000  |   |
| 3   | No        | Show | 3       | C   | -2.1245460 | -1.7762150 | -0.2686950 |   |
| 4   | No        | Show | 4       | N   | -4.5798400 | -2.8843040 | -1.2002320 |   |
| 5   | No        | Show | 5       | C   | -2.4454110 | -1.8037940 | -1.6920000 |   |
| 6   | No        | Show | 6       | N   | -3.6783350 | -2.3605110 | -2.0445130 |   |
| 7   | No        | Show | 7       | Pd  | -0.2534420 | -0.9382980 | 0.1351590  |   |
| 8   | No        | Show | 8       | P   | -1.0039180 | 1.3543290  | 0.0981770  |   |
| 9   | No        | Show | 9       | C   | -2.7366700 | 1.7120210  | -0.3851120 |   |
| 10  | No        | Show | 10      | C   | -3.7637770 | 1.2762210  | 0.4662470  |   |
| 11  | No        | Show | 11      | C   | -3.0711010 | 2.3489140  | -1.5857300 |   |
| 12  | No        | Show | 12      | C   | -5.0975710 | 1.4954080  | 0.1314810  |   |
| 13  | No        | Show | 13      | H   | -3.5211580 | 0.7663690  | 1.3957110  |   |
| 14  | No        | Show | 14      | C   | -4.4097260 | 2.5618440  | -1.9213600 |   |
| 15  | No        | Show | 15      | H   | -2.2893130 | 2.6830000  | -2.2616100 |   |
| 16  | No        | Show | 16      | C   | -5.4254920 | 2.1396590  | -1.0642640 |   |
| 17  | No        | Show | 17      | H   | -5.8825610 | 1.1547980  | 0.8019500  |   |
| 18  | No        | Show | 18      | H   | -4.6558940 | 3.0607620  | -2.8556680 |   |
| 19  | No        | Show | 19      | H   | -6.4671980 | 2.3059640  | -1.3270860 |   |
| 20  | No        | Show | 20      | C   | -0.8665840 | 2.2564240  | 1.6953700  |   |
| 21  | No        | Show | 21      | C   | -1.4157570 | 3.5341120  | 1.8821720  |   |
| 22  | No        | Show | 22      | C   | -0.2252480 | 1.6297430  | 2.7711240  |   |
| 23  | No        | Show | 23      | C   | -1.2916970 | 4.1827830  | 3.1095520  |   |
| 24  | No        | Show | 24      | H   | -1.9615670 | 4.0145960  | 1.0738070  |   |
| 25  | No        | Show | 25      | C   | -0.1039980 | 2.2781180  | 4.0015970  |   |
| 26  | No        | Show | 26      | H   | 0.1651250  | 0.6215400  | 2.6473010  |   |
| 27  | No        | Show | 27      | C   | -0.6308670 | 3.5584020  | 4.1705580  |   |
| 28  | No        | Show | 28      | H   | -1.7208890 | 5.1730460  | 3.2420480  |   |
| 29  | No        | Show | 29      | H   | 0.3922570  | 1.7764820  | 4.8285690  |   |
| 30  | No        | Show | 30      | H   | -0.5416930 | 4.0634560  | 5.1291690  |   |
| 31  | No        | Show | 31      | O   | -1.7051870 | -1.3763410 | -2.5957410 |   |
| 32  | No        | Show | 32      | H   | -5.0266570 | -3.3022300 | 0.7363930  |   |
| 33  | No        | Show | 33      | H   | 1.6927580  | 4.8681570  | -2.4605970 |   |
| 34  | No        | Show | 34      | C   | 1.1784570  | 3.9435580  | -2.2262330 |   |
| 35  | No        | Show | 35      | C   | 1.1929320  | 2.7513400  | -3.0122950 |   |
| 36  | No        | Show | 36      | C   | 0.4269340  | 3.6861350  | -1.0410200 |   |

---

|    |    |      |    |    |            |            |            |
|----|----|------|----|----|------------|------------|------------|
| 37 | No | Show | 37 | C  | 0.4544160  | 1.7529480  | -2.3158880 |
| 38 | No | Show | 38 | H  | 1.7159300  | 2.6129120  | -3.9507940 |
| 39 | No | Show | 39 | C  | -0.0301860 | 2.3250010  | -1.0886120 |
| 40 | No | Show | 40 | Fe | 2.0061130  | 2.4089590  | -1.1584990 |
| 41 | No | Show | 41 | C  | 3.7046690  | 1.2804350  | -1.3371750 |
| 42 | No | Show | 42 | C  | 2.9346580  | 0.8585900  | -0.2021980 |
| 43 | No | Show | 43 | C  | 4.0384740  | 2.6563950  | -1.1640300 |
| 44 | No | Show | 44 | H  | 3.9472070  | 0.6667780  | -2.1955130 |
| 45 | No | Show | 45 | C  | 2.7964260  | 1.9960900  | 0.6673260  |
| 46 | No | Show | 46 | C  | 3.4849520  | 3.0952030  | 0.0765650  |
| 47 | No | Show | 47 | H  | 4.5809790  | 3.2699280  | -1.8733380 |
| 48 | No | Show | 48 | H  | 2.2398490  | 2.0231080  | 1.5954640  |
| 49 | No | Show | 49 | H  | 3.5311770  | 4.1010460  | 0.4763540  |
| 50 | No | Show | 50 | H  | 0.2762250  | 4.3772970  | -0.2216030 |
| 51 | No | Show | 51 | H  | 0.2811030  | 0.7318370  | -2.6345320 |
| 52 | No | Show | 52 | P  | 2.1549640  | -0.7609860 | 0.0842230  |
| 53 | No | Show | 53 | C  | 2.7628830  | -1.7577650 | -1.3396720 |
| 54 | No | Show | 54 | C  | 4.0842260  | -2.2211700 | -1.4160170 |
| 55 | No | Show | 55 | C  | 1.8680660  | -2.0643390 | -2.3749220 |
| 56 | No | Show | 56 | C  | 4.5072290  | -2.9665930 | -2.5154500 |
| 57 | No | Show | 57 | H  | 4.7834540  | -2.0100820 | -0.6107780 |
| 58 | No | Show | 58 | C  | 2.2974980  | -2.8057680 | -3.4773480 |
| 59 | No | Show | 59 | H  | 0.8281610  | -1.7422700 | -2.3217850 |
| 60 | No | Show | 60 | C  | 3.6152470  | -3.2568600 | -3.5508030 |
| 61 | No | Show | 61 | H  | 5.5326340  | -3.3254660 | -2.5613030 |
| 62 | No | Show | 62 | H  | 1.5922920  | -3.0375450 | -4.2713070 |
| 63 | No | Show | 63 | H  | 3.9456310  | -3.8417250 | -4.4057950 |
| 64 | No | Show | 64 | C  | 3.0926400  | -1.4440950 | 1.5100460  |
| 65 | No | Show | 65 | C  | 4.2828570  | -0.8911930 | 2.0003350  |
| 66 | No | Show | 66 | C  | 2.5616620  | -2.5819280 | 2.1356500  |
| 67 | No | Show | 67 | C  | 4.9335330  | -1.4727880 | 3.0903060  |
| 68 | No | Show | 68 | H  | 4.7026770  | -0.0031450 | 1.5349140  |
| 69 | No | Show | 69 | C  | 3.2182590  | -3.1678170 | 3.2160190  |
| 70 | No | Show | 70 | H  | 1.6270090  | -3.0087280 | 1.7755530  |
| 71 | No | Show | 71 | C  | 4.4061410  | -2.6129900 | 3.6974840  |
| 72 | No | Show | 72 | H  | 5.8553650  | -1.0331640 | 3.4636060  |
| 73 | No | Show | 73 | H  | 2.7967930  | -4.0515200 | 3.6883740  |
| 74 | No | Show | 74 | H  | 4.9147010  | -3.0641280 | 4.5457970  |
| 75 | No | Show | 75 | Br | -2.8054780 | -2.3665280 | 2.4637040  |
| 76 | No | Show | 76 | C  | -4.0353720 | -2.3931070 | -3.4563740 |
| 77 | No | Show | 77 | H  | -3.3062180 | -2.9848000 | -4.0153510 |
| 78 | No | Show | 78 | H  | -5.0264150 | -2.8371320 | -3.5332420 |
| 79 | No | Show | 79 | H  | -4.0347390 | -1.3797790 | -3.8642290 |



---

**TS1\_Fc**

| Row | Highlight |      | Display | Tag | Symbol     | X | Y          | Z          |
|-----|-----------|------|---------|-----|------------|---|------------|------------|
| 1   | No        | Show | 1       | H   | 1.4215240  |   | -3.1383270 | -3.2847050 |
| 2   | No        | Show | 2       | C   | 1.1652600  |   | -3.1759870 | -2.2327680 |
| 3   | No        | Show | 3       | C   | 0.8183260  |   | -4.3482370 | -1.4938270 |
| 4   | No        | Show | 4       | C   | 1.1764150  |   | -2.0731040 | -1.3286870 |
| 5   | No        | Show | 5       | C   | 0.6267320  |   | -3.9691050 | -0.1330350 |
| 6   | No        | Show | 6       | H   | 0.7521220  |   | -5.3551170 | -1.8877860 |
| 7   | No        | Show | 7       | C   | 0.8317010  |   | -2.5517510 | -0.0229140 |
| 8   | No        | Show | 8       | Fe  | 2.5143040  |   | -3.5072830 | -0.7420630 |
| 9   | No        | Show | 9       | C   | 3.8241950  |   | -4.5167000 | 0.4578880  |
| 10  | No        | Show | 10      | C   | 4.0870370  |   | -3.1128610 | 0.5030140  |
| 11  | No        | Show | 11      | C   | 3.9539780  |   | -4.9449270 | -0.8989210 |
| 12  | No        | Show | 12      | H   | 3.5455140  |   | -5.1415270 | 1.2977810  |
| 13  | No        | Show | 13      | C   | 4.3773670  |   | -2.6725610 | -0.8248370 |
| 14  | No        | Show | 14      | H   | 4.0348100  |   | -2.4887440 | 1.3861760  |
| 15  | No        | Show | 15      | C   | 4.2954430  |   | -3.8059560 | -1.6911380 |
| 16  | No        | Show | 16      | H   | 3.7831570  |   | -5.9486770 | -1.2685340 |
| 17  | No        | Show | 17      | H   | 4.5849410  |   | -1.6544150 | -1.1302750 |
| 18  | No        | Show | 18      | H   | 4.4272790  |   | -3.7951830 | -2.7661520 |
| 19  | No        | Show | 19      | H   | 1.4412170  |   | -1.0522760 | -1.5744180 |
| 20  | No        | Show | 20      | H   | 0.3549260  |   | -4.6327720 | 0.6786440  |
| 21  | No        | Show | 21      | C   | 0.6731570  |   | -1.7645160 | 1.2138560  |
| 22  | No        | Show | 22      | C   | 1.1155580  |   | -2.3485130 | 2.4463460  |
| 23  | No        | Show | 23      | C   | 0.0794110  |   | -0.5247310 | 1.2667640  |
| 24  | No        | Show | 24      | N   | 0.9991920  |   | -1.7901700 | 3.6186420  |
| 25  | No        | Show | 25      | C   | -0.0788920 |   | 0.1222790  | 2.5595990  |
| 26  | No        | Show | 26      | N   | 0.4179100  |   | -0.5822230 | 3.6562220  |
| 27  | No        | Show | 27      | Pd  | -0.6495830 |   | 0.5041440  | -0.2895300 |
| 28  | No        | Show | 28      | P   | 1.1850700  |   | 2.1606930  | -0.1841680 |
| 29  | No        | Show | 29      | C   | 2.3893590  |   | 2.0343850  | 1.1961890  |
| 30  | No        | Show | 30      | C   | 3.0960350  |   | 0.8344820  | 1.3716770  |
| 31  | No        | Show | 31      | C   | 2.6248690  |   | 3.0950180  | 2.0791920  |
| 32  | No        | Show | 32      | C   | 4.0290410  |   | 0.7068430  | 2.3996180  |
| 33  | No        | Show | 33      | H   | 2.9196460  |   | -0.0033050 | 0.7022750  |
| 34  | No        | Show | 34      | C   | 3.5532890  |   | 2.9615030  | 3.1126470  |
| 35  | No        | Show | 35      | H   | 2.0804390  |   | 4.0276820  | 1.9670030  |
| 36  | No        | Show | 36      | C   | 4.2587470  |   | 1.7696190  | 3.2752150  |
| 37  | No        | Show | 37      | H   | 4.5722960  |   | -0.2262720 | 2.5229940  |
| 38  | No        | Show | 38      | H   | 3.7227140  |   | 3.7936630  | 3.7915160  |
| 39  | No        | Show | 39      | H   | 4.9809440  |   | 1.6664420  | 4.0812930  |
| 40  | No        | Show | 40      | C   | 0.4554710  |   | 3.8308190  | 0.0207260  |
| 41  | No        | Show | 41      | C   | 0.9708740  |   | 4.9679900  | -0.6161060 |
| 42  | No        | Show | 42      | C   | -0.6452780 |   | 3.9580770  | 0.8803900  |
| 43  | No        | Show | 43      | C   | 0.3893580  |   | 6.2172880  | -0.4000850 |

---

|    |    |      |    |    |            |            |            |
|----|----|------|----|----|------------|------------|------------|
| 44 | No | Show | 44 | H  | 1.8278400  | 4.8839250  | -1.2787650 |
| 45 | No | Show | 45 | C  | -1.2138830 | 5.2121490  | 1.1005670  |
| 46 | No | Show | 46 | H  | -1.0350570 | 3.0801220  | 1.3900070  |
| 47 | No | Show | 47 | C  | -0.7037180 | 6.3416670  | 0.4591980  |
| 48 | No | Show | 48 | H  | 0.7940420  | 7.0932290  | -0.9012720 |
| 49 | No | Show | 49 | H  | -2.0636950 | 5.3032300  | 1.7724230  |
| 50 | No | Show | 50 | H  | -1.1556390 | 7.3163190  | 0.6271640  |
| 51 | No | Show | 51 | C  | 2.2719350  | 2.3369960  | -1.6652960 |
| 52 | No | Show | 52 | C  | 3.6701990  | 2.2718470  | -1.5982800 |
| 53 | No | Show | 53 | C  | 1.6670590  | 2.5374270  | -2.9175830 |
| 54 | No | Show | 54 | C  | 4.4439710  | 2.3913300  | -2.7548620 |
| 55 | No | Show | 55 | H  | 4.1665330  | 2.1391890  | -0.6418150 |
| 56 | No | Show | 56 | C  | 2.4424900  | 2.6654440  | -4.0685930 |
| 57 | No | Show | 57 | H  | 0.5866820  | 2.6161420  | -2.9845560 |
| 58 | No | Show | 58 | C  | 3.8347780  | 2.5856100  | -3.9934950 |
| 59 | No | Show | 59 | H  | 5.5275680  | 2.3404410  | -2.6808250 |
| 60 | No | Show | 60 | H  | 1.9563030  | 2.8306510  | -5.0271230 |
| 61 | No | Show | 61 | H  | 4.4387290  | 2.6819650  | -4.8922230 |
| 62 | No | Show | 62 | O  | -0.6212330 | 1.2226250  | 2.7539040  |
| 63 | No | Show | 63 | H  | 1.5973310  | -3.3226810 | 2.4488320  |
| 64 | No | Show | 64 | C  | 0.2977390  | 0.0329110  | 4.9708430  |
| 65 | No | Show | 65 | H  | 0.8139380  | 0.9954850  | 4.9794980  |
| 66 | No | Show | 66 | H  | -0.7537940 | 0.2089110  | 5.2106540  |
| 67 | No | Show | 67 | H  | 0.7450460  | -0.6500070 | 5.6911510  |
| 68 | No | Show | 68 | H  | -6.6103750 | -2.8230950 | -0.3134600 |
| 69 | No | Show | 69 | C  | -6.3214080 | -1.7934280 | -0.1424050 |
| 70 | No | Show | 70 | C  | -6.0627580 | -1.1938400 | 1.1291560  |
| 71 | No | Show | 71 | C  | -6.0846890 | -0.8136400 | -1.1513880 |
| 72 | No | Show | 72 | C  | -5.6561390 | 0.1548530  | 0.9117000  |
| 73 | No | Show | 73 | H  | -6.1133780 | -1.6916190 | 2.0895290  |
| 74 | No | Show | 74 | C  | -5.6844180 | 0.3943940  | -0.4954140 |
| 75 | No | Show | 75 | Fe | -4.3848210 | -1.1788430 | -0.0224910 |
| 76 | No | Show | 76 | C  | -2.7173190 | -1.4151460 | 1.1507110  |
| 77 | No | Show | 77 | C  | -2.2267830 | -0.8950370 | -0.0920140 |
| 78 | No | Show | 78 | C  | -3.3954720 | -2.6543590 | 0.9329770  |
| 79 | No | Show | 79 | H  | -2.5900900 | -0.9431610 | 2.1174660  |
| 80 | No | Show | 80 | C  | -2.7010280 | -1.8134530 | -1.0924080 |
| 81 | No | Show | 81 | C  | -3.3955030 | -2.8973750 | -0.4727840 |
| 82 | No | Show | 82 | H  | -3.8757510 | -3.2677940 | 1.6871920  |
| 83 | No | Show | 83 | H  | -2.5369660 | -1.7274550 | -2.1604220 |
| 84 | No | Show | 84 | H  | -3.8670910 | -3.7306280 | -0.9815350 |
| 85 | No | Show | 85 | H  | -6.2087240 | -0.9539760 | -2.2190510 |
| 86 | No | Show | 86 | H  | -5.3588300 | 0.8619370  | 1.6764110  |
| 87 | No | Show | 87 | H  | -5.5500640 | 1.3491300  | -0.9908890 |
| 88 | No | Show | 88 | O  | -3.4953030 | 0.6923050  | -2.7771660 |

---

|    |    |      |    |   |            |           |            |
|----|----|------|----|---|------------|-----------|------------|
| 89 | No | Show | 89 | H | -4.0812920 | 0.1853590 | -2.1801920 |
| 90 | No | Show | 90 | O | -2.9877840 | 2.4174100 | -1.0879590 |
| 91 | No | Show | 91 | H | -3.8645610 | 2.2517390 | -0.7214720 |
| 92 | No | Show | 92 | B | -2.6654740 | 1.5135910 | -2.0574520 |
| 93 | No | Show | 93 | O | -1.3063300 | 1.4897080 | -2.3849960 |
| 94 | No | Show | 94 | H | -1.1742150 | 0.7959000 | -3.0489220 |

#### TS1\_Ph

| Row | Highlight |      | Display Tag |    | Symbol X   | Y          | Z          |
|-----|-----------|------|-------------|----|------------|------------|------------|
| 1   | No        | Show | 1           | C  | -2.0414700 | 1.7573420  | -0.0290240 |
| 2   | No        | Show | 2           | C  | -2.5004750 | 2.9335240  | -0.7130510 |
| 3   | No        | Show | 3           | C  | -1.1847030 | 0.9177390  | -0.7049050 |
| 4   | No        | Show | 4           | N  | -2.1886930 | 3.2531300  | -1.9376700 |
| 5   | No        | Show | 5           | C  | -0.8145390 | 1.2499630  | -2.0714020 |
| 6   | No        | Show | 6           | N  | -1.3773280 | 2.4121680  | -2.5929150 |
| 7   | No        | Show | 7           | Pd | -0.4286930 | -0.8184990 | -0.0270100 |
| 8   | No        | Show | 8           | P  | 1.7722230  | 0.0875090  | 0.2090800  |
| 9   | No        | Show | 9           | C  | 2.1456560  | 1.8198640  | -0.2501790 |
| 10  | No        | Show | 10          | C  | 1.3745900  | 2.8527460  | 0.3049960  |
| 11  | No        | Show | 11          | C  | 3.1730280  | 2.1425760  | -1.1453910 |
| 12  | No        | Show | 12          | C  | 1.6370820  | 4.1827010  | -0.0187700 |
| 13  | No        | Show | 13          | H  | 0.5664350  | 2.6240950  | 0.9937810  |
| 14  | No        | Show | 14          | C  | 3.4293960  | 3.4748220  | -1.4720070 |
| 15  | No        | Show | 15          | H  | 3.7726410  | 1.3564130  | -1.5944740 |
| 16  | No        | Show | 16          | C  | 2.6648550  | 4.4970000  | -0.9097150 |
| 17  | No        | Show | 17          | H  | 1.0301430  | 4.9711690  | 0.4184110  |
| 18  | No        | Show | 18          | H  | 4.2285740  | 3.7111440  | -2.1699970 |
| 19  | No        | Show | 19          | H  | 2.8648760  | 5.5338900  | -1.1677710 |
| 20  | No        | Show | 20          | C  | 2.8908790  | -0.9346770 | -0.8231050 |
| 21  | No        | Show | 21          | C  | 4.1582350  | -1.3383140 | -0.3818210 |
| 22  | No        | Show | 22          | C  | 2.4492410  | -1.3135150 | -2.1003360 |
| 23  | No        | Show | 23          | C  | 4.9731180  | -2.1153170 | -1.2058380 |
| 24  | No        | Show | 24          | H  | 4.5142140  | -1.0511110 | 0.6038080  |
| 25  | No        | Show | 25          | C  | 3.2731110  | -2.0842620 | -2.9208150 |
| 26  | No        | Show | 26          | H  | 1.4771370  | -0.9759150 | -2.4552820 |
| 27  | No        | Show | 27          | C  | 4.5319770  | -2.4914850 | -2.4751760 |
| 28  | No        | Show | 28          | H  | 5.9531710  | -2.4263940 | -0.8528200 |
| 29  | No        | Show | 29          | H  | 2.9257490  | -2.3677010 | -3.9112180 |
| 30  | No        | Show | 30          | H  | 5.1673890  | -3.0994910 | -3.1143260 |
| 31  | No        | Show | 31          | C  | 2.4466190  | -0.0986410 | 1.9089450  |
| 32  | No        | Show | 32          | C  | 3.0126360  | 0.9590620  | 2.6308480  |
| 33  | No        | Show | 33          | C  | 2.3619640  | -1.3658490 | 2.5102340  |
| 34  | No        | Show | 34          | C  | 3.4786580  | 0.7559950  | 3.9318600  |
| 35  | No        | Show | 35          | H  | 3.1012220  | 1.9430700  | 2.1799840  |
| 36  | No        | Show | 36          | C  | 2.8369060  | -1.5665700 | 3.8039870  |

|    |    |      |    |   |            |            |            |
|----|----|------|----|---|------------|------------|------------|
| 37 | No | Show | 37 | H | 1.9477360  | -2.2003950 | 1.9506690  |
| 38 | No | Show | 38 | C | 3.3915680  | -0.5038960 | 4.5220150  |
| 39 | No | Show | 39 | H | 3.9157790  | 1.5868360  | 4.4799680  |
| 40 | No | Show | 40 | H | 2.7743750  | -2.5549190 | 4.2525720  |
| 41 | No | Show | 41 | H | 3.7571070  | -0.6601810 | 5.5336950  |
| 42 | No | Show | 42 | O | -0.0532000 | 0.5809450  | -2.7914310 |
| 43 | No | Show | 43 | H | -3.1396060 | 3.6533140  | -0.2084040 |
| 44 | No | Show | 44 | C | -1.0451370 | 2.7762170  | -3.9637150 |
| 45 | No | Show | 45 | H | 0.0325100  | 2.9269350  | -4.0609200 |
| 46 | No | Show | 46 | H | -1.3391080 | 1.9744140  | -4.6448090 |
| 47 | No | Show | 47 | H | -1.5833370 | 3.6936200  | -4.1956160 |
| 48 | No | Show | 48 | O | -1.8498200 | -4.3116860 | 0.4517000  |
| 49 | No | Show | 49 | H | -2.2749060 | -4.9221110 | -0.1644900 |
| 50 | No | Show | 50 | O | -0.6418090 | -3.7612230 | -1.5736100 |
| 51 | No | Show | 51 | H | 0.2960140  | -3.5580500 | -1.6847310 |
| 52 | No | Show | 52 | B | -1.0722250 | -3.3828320 | -0.2805100 |
| 53 | No | Show | 53 | O | 0.0265010  | -2.8633280 | 0.5695770  |
| 54 | No | Show | 54 | H | -0.2275260 | -3.0595530 | 1.4850750  |
| 55 | No | Show | 55 | C | -2.5215710 | 1.5457960  | 1.3602920  |
| 56 | No | Show | 56 | C | -1.6757010 | 1.0675150  | 2.3726740  |
| 57 | No | Show | 57 | C | -3.8508650 | 1.8469840  | 1.7005820  |
| 58 | No | Show | 58 | C | -2.1389710 | 0.8956340  | 3.6762910  |
| 59 | No | Show | 59 | H | -0.6399570 | 0.8331700  | 2.1432260  |
| 60 | No | Show | 60 | C | -4.3182390 | 1.6690250  | 3.0011780  |
| 61 | No | Show | 61 | H | -4.5390460 | 2.1865270  | 0.9309430  |
| 62 | No | Show | 62 | C | -3.4634320 | 1.1946450  | 3.9978080  |
| 63 | No | Show | 63 | H | -1.4595270 | 0.5302420  | 4.4424430  |
| 64 | No | Show | 64 | H | -5.3558390 | 1.8947200  | 3.2348380  |
| 65 | No | Show | 65 | H | -3.8266060 | 1.0581390  | 5.0132740  |
| 66 | No | Show | 66 | C | -2.2920940 | -1.8673610 | -0.5369210 |
| 67 | No | Show | 67 | C | -3.2926190 | -1.7239840 | 0.4528830  |
| 68 | No | Show | 68 | C | -2.7022290 | -1.7171980 | -1.8807230 |
| 69 | No | Show | 69 | C | -4.6249560 | -1.4880780 | 0.1246070  |
| 70 | No | Show | 70 | H | -3.0303990 | -1.8406450 | 1.5023290  |
| 71 | No | Show | 71 | C | -4.0331990 | -1.4822670 | -2.2222070 |
| 72 | No | Show | 72 | H | -1.9603490 | -1.8249260 | -2.6670330 |
| 73 | No | Show | 73 | C | -4.9975780 | -1.3675650 | -1.2177650 |
| 74 | No | Show | 74 | H | -5.3734580 | -1.4010200 | 0.9089670  |
| 75 | No | Show | 75 | H | -4.3210260 | -1.3904240 | -3.2674380 |
| 76 | No | Show | 76 | H | -6.0384230 | -1.1881830 | -1.4796430 |

#### TS2\_Fc

| Row | Highlight | Display | Tag | Symbol | X         | Y          | Z          |
|-----|-----------|---------|-----|--------|-----------|------------|------------|
| 1   | No        | Show    | 1   | H      | 2.1357240 | -1.5644780 | -3.7419360 |
| 2   | No        | Show    | 2   | C      | 2.1368170 | -1.9289550 | -2.7216590 |

---

|    |    |      |    |    |            |            |            |
|----|----|------|----|----|------------|------------|------------|
| 3  | No | Show | 3  | C  | 2.6493430  | -3.1856340 | -2.2760690 |
| 4  | No | Show | 4  | C  | 1.6850590  | -1.2124010 | -1.5761090 |
| 5  | No | Show | 5  | C  | 2.5267250  | -3.2387420 | -0.8578740 |
| 6  | No | Show | 6  | H  | 3.1031720  | -3.9464680 | -2.8998460 |
| 7  | No | Show | 7  | C  | 1.9063460  | -2.0201590 | -0.4092930 |
| 8  | No | Show | 8  | Fe | 3.6687720  | -1.6457290 | -1.4072750 |
| 9  | No | Show | 9  | C  | 5.5028480  | -1.9461920 | -0.5685570 |
| 10 | No | Show | 10 | C  | 4.9356030  | -0.7216810 | -0.1029610 |
| 11 | No | Show | 11 | C  | 5.6107050  | -1.8662940 | -1.9910130 |
| 12 | No | Show | 12 | H  | 5.7398650  | -2.8025340 | 0.0493350  |
| 13 | No | Show | 13 | C  | 4.6878180  | 0.1158550  | -1.2348900 |
| 14 | No | Show | 14 | H  | 4.6862340  | -0.5050170 | 0.9277440  |
| 15 | No | Show | 15 | C  | 5.1049620  | -0.5943340 | -2.4037830 |
| 16 | No | Show | 16 | H  | 5.9673600  | -2.6509080 | -2.6473360 |
| 17 | No | Show | 17 | H  | 4.2278090  | 1.0967640  | -1.2210320 |
| 18 | No | Show | 18 | H  | 5.0145860  | -0.2462060 | -3.4256360 |
| 19 | No | Show | 19 | H  | 1.2840910  | -0.2078830 | -1.5778500 |
| 20 | No | Show | 20 | H  | 2.8702720  | -4.0328360 | -0.2112260 |
| 21 | No | Show | 21 | C  | 1.5293870  | -1.6815050 | 0.9705820  |
| 22 | No | Show | 22 | C  | 2.3184800  | -2.2766120 | 2.0553720  |
| 23 | No | Show | 23 | C  | 0.4423970  | -0.8970620 | 1.3017950  |
| 24 | No | Show | 24 | N  | 1.8892140  | -1.9708240 | 3.3481970  |
| 25 | No | Show | 25 | C  | 0.1575030  | -0.6930720 | 2.6874210  |
| 26 | No | Show | 26 | N  | 0.8382350  | -1.2112380 | 3.6772860  |
| 27 | No | Show | 27 | Pd | -0.8962720 | -0.0232200 | 0.0642470  |
| 28 | No | Show | 28 | P  | -0.0082810 | 2.2541270  | 0.3049560  |
| 29 | No | Show | 29 | C  | 1.0033890  | 2.6261820  | 1.7871280  |
| 30 | No | Show | 30 | C  | 2.2183600  | 1.9399990  | 1.9441480  |
| 31 | No | Show | 31 | C  | 0.5992000  | 3.5327990  | 2.7740990  |
| 32 | No | Show | 32 | C  | 3.0181670  | 2.1727860  | 3.0600360  |
| 33 | No | Show | 33 | H  | 2.5405070  | 1.2234900  | 1.1929340  |
| 34 | No | Show | 34 | C  | 1.3983620  | 3.7529910  | 3.8979050  |
| 35 | No | Show | 35 | H  | -0.3362720 | 4.0753640  | 2.6715100  |
| 36 | No | Show | 36 | C  | 2.6090670  | 3.0773430  | 4.0422320  |
| 37 | No | Show | 37 | H  | 3.9579270  | 1.6375400  | 3.1673720  |
| 38 | No | Show | 38 | H  | 1.0720750  | 4.4583020  | 4.6581040  |
| 39 | No | Show | 39 | H  | 3.2302090  | 3.2505610  | 4.9172320  |
| 40 | No | Show | 40 | C  | -1.3829100 | 3.4751340  | 0.4026420  |
| 41 | No | Show | 41 | C  | -1.3146900 | 4.7602000  | -0.1576250 |
| 42 | No | Show | 42 | C  | -2.5502290 | 3.0928400  | 1.0851430  |
| 43 | No | Show | 43 | C  | -2.3891800 | 5.6428070  | -0.0326400 |
| 44 | No | Show | 44 | H  | -0.4255100 | 5.0711310  | -0.6993030 |
| 45 | No | Show | 45 | C  | -3.6160860 | 3.9814000  | 1.2199970  |
| 46 | No | Show | 46 | H  | -2.6233870 | 2.0914960  | 1.5035280  |
| 47 | No | Show | 47 | C  | -3.5380340 | 5.2578670  | 0.6595620  |

---

|    |    |      |    |    |            |            |            |
|----|----|------|----|----|------------|------------|------------|
| 48 | No | Show | 48 | H  | -2.3262340 | 6.6319540  | -0.4787810 |
| 49 | No | Show | 49 | H  | -4.5120130 | 3.6717010  | 1.7516970  |
| 50 | No | Show | 50 | H  | -4.3733700 | 5.9466690  | 0.7542330  |
| 51 | No | Show | 51 | C  | 1.0195400  | 2.8838080  | -1.0830630 |
| 52 | No | Show | 52 | C  | 2.0679430  | 3.7974520  | -0.9027320 |
| 53 | No | Show | 53 | C  | 0.7190320  | 2.4421520  | -2.3794730 |
| 54 | No | Show | 54 | C  | 2.7965010  | 4.2596520  | -1.9990590 |
| 55 | No | Show | 55 | H  | 2.3219260  | 4.1451030  | 0.0949210  |
| 56 | No | Show | 56 | C  | 1.4404570  | 2.9141910  | -3.4751950 |
| 57 | No | Show | 57 | H  | -0.0805280 | 1.7223710  | -2.5373710 |
| 58 | No | Show | 58 | C  | 2.4829160  | 3.8223680  | -3.2869710 |
| 59 | No | Show | 59 | H  | 3.6115500  | 4.9622580  | -1.8446850 |
| 60 | No | Show | 60 | H  | 1.1933960  | 2.5628880  | -4.4735540 |
| 61 | No | Show | 61 | H  | 3.0535300  | 4.1827020  | -4.1390430 |
| 62 | No | Show | 62 | H  | -5.8678170 | -3.5596420 | -1.3676280 |
| 63 | No | Show | 63 | C  | -5.5638880 | -2.9044930 | -0.5605250 |
| 64 | No | Show | 64 | C  | -5.3491540 | -3.2876540 | 0.7986760  |
| 65 | No | Show | 65 | C  | -5.2653350 | -1.5132530 | -0.6808340 |
| 66 | No | Show | 66 | C  | -4.9110300 | -2.1354150 | 1.5210780  |
| 67 | No | Show | 67 | H  | -5.4579830 | -4.2868320 | 1.2022780  |
| 68 | No | Show | 68 | C  | -4.8635830 | -1.0374900 | 0.6107210  |
| 69 | No | Show | 69 | Fe | -3.6267050 | -2.5598990 | -0.0101540 |
| 70 | No | Show | 70 | C  | -1.8311000 | -2.9735010 | 0.8759100  |
| 71 | No | Show | 71 | C  | -1.6295040 | -1.9414240 | -0.0939460 |
| 72 | No | Show | 72 | C  | -2.3655430 | -4.1333070 | 0.2337660  |
| 73 | No | Show | 73 | H  | -1.6384810 | -2.8856070 | 1.9383130  |
| 74 | No | Show | 74 | C  | -2.0694550 | -2.4884220 | -1.3520420 |
| 75 | No | Show | 75 | C  | -2.5172360 | -3.8308530 | -1.1521830 |
| 76 | No | Show | 76 | H  | -2.6469950 | -5.0610990 | 0.7185020  |
| 77 | No | Show | 77 | H  | -2.0571550 | -1.9829820 | -2.3115560 |
| 78 | No | Show | 78 | H  | -2.9284100 | -4.4877720 | -1.9100820 |
| 79 | No | Show | 79 | H  | -5.3402790 | -0.9295550 | -1.5913490 |
| 80 | No | Show | 80 | H  | -4.6260120 | -2.1095460 | 2.5657440  |
| 81 | No | Show | 81 | H  | -4.5540680 | -0.0280070 | 0.8514070  |
| 82 | No | Show | 82 | O  | -4.0450990 | 0.6533290  | -3.2401740 |
| 83 | No | Show | 83 | H  | -4.3279130 | 1.2713450  | -3.9285390 |
| 84 | No | Show | 84 | O  | -2.8684430 | 2.5897490  | -2.5429010 |
| 85 | No | Show | 85 | H  | -2.3938190 | 2.9712560  | -1.7878750 |
| 86 | No | Show | 86 | B  | -3.2216970 | 1.2842140  | -2.3426340 |
| 87 | No | Show | 87 | O  | -2.7653200 | 0.5725540  | -1.2471220 |
| 88 | No | Show | 88 | H  | -3.1819730 | -0.3169000 | -1.1701700 |
| 89 | No | Show | 89 | H  | -0.6856830 | -0.0861600 | 3.0044960  |
| 90 | No | Show | 90 | O  | 3.3040520  | -3.0135240 | 1.9220750  |
| 91 | No | Show | 91 | C  | 2.6268660  | -2.5602810 | 4.4577030  |
| 92 | No | Show | 92 | H  | 2.1733650  | -2.1944510 | 5.3772310  |

|    |    |      |    |   |           |            |           |
|----|----|------|----|---|-----------|------------|-----------|
| 93 | No | Show | 93 | H | 2.5737130 | -3.6508270 | 4.4111780 |
| 94 | No | Show | 94 | H | 3.6794050 | -2.2727110 | 4.4057220 |

# TS2\_Ph

| Row | Highlight |      | Display | Tag | Symbol     | X          | Y          | Z |
|-----|-----------|------|---------|-----|------------|------------|------------|---|
| 1   | No        | Show | 1       | C   | -2.1252640 | 1.4004470  | -0.0010730 |   |
| 2   | No        | Show | 2       | C   | -2.7781820 | 2.5579340  | -0.6237970 |   |
| 3   | No        | Show | 3       | C   | -1.2163690 | 0.6781550  | -0.7450190 |   |
| 4   | No        | Show | 4       | N   | -2.4292760 | 2.7946860  | -1.9562590 |   |
| 5   | No        | Show | 5       | C   | -0.9730360 | 1.0820200  | -2.0930550 |   |
| 6   | No        | Show | 6       | N   | -1.5579590 | 2.0910940  | -2.6835230 |   |
| 7   | No        | Show | 7       | Pd  | -0.2282470 | -0.9485080 | -0.0816570 |   |
| 8   | No        | Show | 8       | P   | 1.8581150  | 0.2410350  | 0.0883970  |   |
| 9   | No        | Show | 9       | C   | 1.9208390  | 2.0254170  | -0.3205600 |   |
| 10  | No        | Show | 10      | C   | 1.0875740  | 2.9084660  | 0.3852670  |   |
| 11  | No        | Show | 11      | C   | 2.7343380  | 2.5294110  | -1.3431240 |   |
| 12  | No        | Show | 12      | C   | 1.0893330  | 4.2697720  | 0.0894720  |   |
| 13  | No        | Show | 13      | H   | 0.4298290  | 2.5397760  | 1.1673530  |   |
| 14  | No        | Show | 14      | C   | 2.7260750  | 3.8925440  | -1.6432550 |   |
| 15  | No        | Show | 15      | H   | 3.3734930  | 1.8622120  | -1.9137660 |   |
| 16  | No        | Show | 16      | C   | 1.9085940  | 4.7654180  | -0.9267940 |   |
| 17  | No        | Show | 17      | H   | 0.4376700  | 4.9383650  | 0.6456560  |   |
| 18  | No        | Show | 18      | H   | 3.3593840  | 4.2689030  | -2.4425390 |   |
| 19  | No        | Show | 19      | H   | 1.9020130  | 5.8262040  | -1.1639700 |   |
| 20  | No        | Show | 20      | C   | 3.0575920  | -0.5466950 | -1.0551240 |   |
| 21  | No        | Show | 21      | C   | 4.4417580  | -0.4601100 | -0.8444340 |   |
| 22  | No        | Show | 22      | C   | 2.5777870  | -1.2400890 | -2.1739080 |   |
| 23  | No        | Show | 23      | C   | 5.3283110  | -1.0469100 | -1.7459330 |   |
| 24  | No        | Show | 24      | H   | 4.8282390  | 0.0614700  | 0.0274770  |   |
| 25  | No        | Show | 25      | C   | 3.4678210  | -1.8213260 | -3.0782980 |   |
| 26  | No        | Show | 26      | H   | 1.5063490  | -1.3424440 | -2.3297560 |   |
| 27  | No        | Show | 27      | C   | 4.8432530  | -1.7253730 | -2.8663250 |   |
| 28  | No        | Show | 28      | H   | 6.3989820  | -0.9758210 | -1.5717840 |   |
| 29  | No        | Show | 29      | H   | 3.0830580  | -2.3552620 | -3.9434180 |   |
| 30  | No        | Show | 30      | H   | 5.5363340  | -2.1832020 | -3.5675550 |   |
| 31  | No        | Show | 31      | C   | 2.6927180  | 0.0909520  | 1.7189210  |   |
| 32  | No        | Show | 32      | C   | 3.1463120  | 1.1865550  | 2.4629090  |   |
| 33  | No        | Show | 33      | C   | 2.8619920  | -1.2044620 | 2.2352960  |   |
| 34  | No        | Show | 34      | C   | 3.7561460  | 0.9900730  | 3.7041580  |   |
| 35  | No        | Show | 35      | H   | 3.0354730  | 2.1954450  | 2.0762240  |   |
| 36  | No        | Show | 36      | C   | 3.4783560  | -1.3957110 | 3.4694130  |   |
| 37  | No        | Show | 37      | H   | 2.5256630  | -2.0631690 | 1.6596680  |   |
| 38  | No        | Show | 38      | C   | 3.9232280  | -0.2979050 | 4.2105930  |   |
| 39  | No        | Show | 39      | H   | 4.1045560  | 1.8493720  | 4.2715340  |   |
| 40  | No        | Show | 40      | H   | 3.6109200  | -2.4038870 | 3.8540150  |   |

|    |    |      |    |   |            |            |            |
|----|----|------|----|---|------------|------------|------------|
| 41 | No | Show | 41 | H | 4.3997780  | -0.4477770 | 5.1759410  |
| 42 | No | Show | 42 | O | -1.1842380 | -4.6012570 | 0.2675640  |
| 43 | No | Show | 43 | H | -1.7686250 | -5.0425370 | -0.3629300 |
| 44 | No | Show | 44 | O | -0.0446140 | -3.6678680 | -1.7015750 |
| 45 | No | Show | 45 | H | 0.8713200  | -3.9790790 | -1.6655320 |
| 46 | No | Show | 46 | B | -0.5133540 | -3.5410820 | -0.3681280 |
| 47 | No | Show | 47 | O | 0.4803270  | -2.9568190 | 0.5337140  |
| 48 | No | Show | 48 | H | 0.2150610  | -3.1786840 | 1.4403450  |
| 49 | No | Show | 49 | C | -2.5023340 | 1.0818930  | 1.3979600  |
| 50 | No | Show | 50 | C | -1.5462070 | 0.6648680  | 2.3382830  |
| 51 | No | Show | 51 | C | -3.8398670 | 1.1720040  | 1.8206630  |
| 52 | No | Show | 52 | C | -1.9070090 | 0.3346000  | 3.6446010  |
| 53 | No | Show | 53 | H | -0.4988080 | 0.6065150  | 2.0547670  |
| 54 | No | Show | 54 | C | -4.2039700 | 0.8288010  | 3.1204230  |
| 55 | No | Show | 55 | H | -4.5977120 | 1.5074710  | 1.1226820  |
| 56 | No | Show | 56 | C | -3.2417020 | 0.4096540  | 4.0419090  |
| 57 | No | Show | 57 | H | -1.1405400 | 0.0247870  | 4.3511500  |
| 58 | No | Show | 58 | H | -5.2479220 | 0.8953540  | 3.4174750  |
| 59 | No | Show | 59 | H | -3.5284000 | 0.1517920  | 5.0585750  |
| 60 | No | Show | 60 | C | -1.9860750 | -2.1338530 | -0.5733520 |
| 61 | No | Show | 61 | C | -2.9734400 | -2.1859690 | 0.4375620  |
| 62 | No | Show | 62 | C | -2.4412930 | -2.1535560 | -1.9087870 |
| 63 | No | Show | 63 | C | -4.3284600 | -2.2874620 | 0.1351890  |
| 64 | No | Show | 64 | H | -2.6771640 | -2.1695070 | 1.4842600  |
| 65 | No | Show | 65 | C | -3.7961150 | -2.2633340 | -2.2234700 |
| 66 | No | Show | 66 | H | -1.7128410 | -2.1248460 | -2.7146030 |
| 67 | No | Show | 67 | C | -4.7430650 | -2.3283890 | -1.1999300 |
| 68 | No | Show | 68 | H | -5.0626020 | -2.3300960 | 0.9363520  |
| 69 | No | Show | 69 | H | -4.1132190 | -2.2936010 | -3.2637250 |
| 70 | No | Show | 70 | H | -5.8011920 | -2.4089560 | -1.4396510 |
| 71 | No | Show | 71 | O | -3.5851670 | 3.3202940  | -0.0796380 |
| 72 | No | Show | 72 | H | -0.2749370 | 0.5436150  | -2.7273990 |
| 73 | No | Show | 73 | C | -3.0652100 | 3.9216350  | -2.6258360 |
| 74 | No | Show | 74 | H | -2.6744660 | 3.9564390  | -3.6411720 |
| 75 | No | Show | 75 | H | -4.1497690 | 3.7904910  | -2.6353130 |
| 76 | No | Show | 76 | H | -2.8418960 | 4.8497940  | -2.0947570 |

**TS\_33a\_to\_34a+32**

| Row | Highlight | Display | Tag | Symbol | X         | Y          | Z         |
|-----|-----------|---------|-----|--------|-----------|------------|-----------|
| 1   | No        | Show    | 1   | H      | 2.7200984 | -3.2892776 | 1.7405450 |
| 2   | No        | Show    | 2   | C      | 3.0934324 | -2.3341296 | 1.3933000 |
| 3   | No        | Show    | 3   | C      | 4.4134494 | -2.0648646 | 0.9308910 |
| 4   | No        | Show    | 4   | C      | 2.3720544 | -1.0942026 | 1.3884700 |
| 5   | No        | Show    | 5   | C      | 4.5122804 | -0.6749506 | 0.6258060 |
| 6   | No        | Show    | 6   | H      | 5.1981764 | -2.7995746 | 0.7968450 |



---

|    |    |      |    |    |            |            |            |
|----|----|------|----|----|------------|------------|------------|
| 7  | No | Show | 7  | C  | 3.2492004  | -0.0643636 | 0.8923330  |
| 8  | No | Show | 8  | Fe | 3.0546924  | -1.5654186 | -0.5078160 |
| 9  | No | Show | 9  | C  | 3.8574214  | -1.3464946 | -2.3631960 |
| 10 | No | Show | 10 | C  | 2.5687914  | -0.7358596 | -2.3248280 |
| 11 | No | Show | 11 | C  | 3.6999624  | -2.7309616 | -2.0456800 |
| 12 | No | Show | 12 | H  | 4.7934034  | -0.8349806 | -2.5503160 |
| 13 | No | Show | 13 | C  | 1.6115664  | -1.7373416 | -1.9911750 |
| 14 | No | Show | 14 | H  | 2.3624154  | 0.3174984  | -2.4696950 |
| 15 | No | Show | 15 | C  | 2.3117204  | -2.9730706 | -1.8133730 |
| 16 | No | Show | 16 | H  | 4.5002764  | -3.4556496 | -1.9601650 |
| 17 | No | Show | 17 | H  | 0.5426974  | -1.6122136 | -1.8815950 |
| 18 | No | Show | 18 | H  | 1.8640094  | -3.9272956 | -1.5614750 |
| 19 | No | Show | 19 | H  | 1.4233274  | -0.9318206 | 1.9162530  |
| 20 | No | Show | 20 | H  | 5.3714284  | -0.1566456 | 0.2250980  |
| 21 | No | Show | 21 | C  | 2.8124524  | 1.3183864  | 0.6839630  |
| 22 | No | Show | 22 | C  | 3.6524196  | 2.4749683  | 0.7248710  |
| 23 | No | Show | 23 | C  | 1.4743354  | 1.5897894  | 0.4544390  |
| 24 | No | Show | 24 | N  | 3.2045844  | 3.7091490  | 0.7103643  |
| 25 | No | Show | 25 | C  | 0.9548676  | 2.9513178  | 0.4342233  |
| 26 | No | Show | 26 | N  | 1.9189897  | 3.9225525  | 0.5863212  |
| 27 | No | Show | 27 | Pd | 0.1299494  | -0.1036986 | 0.4340640  |
| 28 | No | Show | 28 | P  | -1.9208956 | 0.7279714  | -0.1039770 |
| 29 | No | Show | 29 | C  | -1.8586386 | 2.3919474  | -0.8861280 |
| 30 | No | Show | 30 | C  | -0.9192046 | 2.5979344  | -1.9072560 |
| 31 | No | Show | 31 | C  | -2.7300306 | 3.4312464  | -0.5409320 |
| 32 | No | Show | 32 | C  | -0.8640666 | 3.8147594  | -2.5828930 |
| 33 | No | Show | 33 | H  | -0.2170956 | 1.8059654  | -2.1580440 |
| 34 | No | Show | 34 | C  | -2.6607666 | 4.6567004  | -1.2074680 |
| 35 | No | Show | 35 | H  | -3.4556446 | 3.2968654  | 0.2560070  |
| 36 | No | Show | 36 | C  | -1.7337296 | 4.8493604  | -2.2314420 |
| 37 | No | Show | 37 | H  | -0.1275666 | 3.9618584  | -3.3683880 |
| 38 | No | Show | 38 | H  | -3.3335476 | 5.4612304  | -0.9214610 |
| 39 | No | Show | 39 | H  | -1.6805406 | 5.8051164  | -2.7463140 |
| 40 | No | Show | 40 | C  | -2.9858946 | 0.9494254  | 1.3725130  |
| 41 | No | Show | 41 | C  | -4.3853586 | 0.9576144  | 1.2932620  |
| 42 | No | Show | 42 | C  | -2.3690036 | 1.1583674  | 2.6128590  |
| 43 | No | Show | 43 | C  | -5.1523806 | 1.1691174  | 2.4393340  |
| 44 | No | Show | 44 | H  | -4.8796156 | 0.7904364  | 0.3400730  |
| 45 | No | Show | 45 | C  | -3.1377466 | 1.3805734  | 3.7544200  |
| 46 | No | Show | 46 | H  | -1.2833006 | 1.1409314  | 2.6798940  |
| 47 | No | Show | 47 | C  | -4.5310706 | 1.3832004  | 3.6705170  |
| 48 | No | Show | 48 | H  | -6.2371526 | 1.1659934  | 2.3678380  |
| 49 | No | Show | 49 | H  | -2.6471316 | 1.5425054  | 4.7107260  |
| 50 | No | Show | 50 | H  | -5.1306706 | 1.5472884  | 4.5623140  |
| 51 | No | Show | 51 | C  | -2.9877716 | -0.1808866 | -1.2959780 |

---

|    |    |      |    |   |            |            |            |
|----|----|------|----|---|------------|------------|------------|
| 52 | No | Show | 52 | C | -3.3138756 | 0.3405754  | -2.5549210 |
| 53 | No | Show | 53 | C | -3.5476496 | -1.4035636 | -0.9009470 |
| 54 | No | Show | 54 | C | -4.1875436 | -0.3453236 | -3.4003260 |
| 55 | No | Show | 55 | H | -2.9081496 | 1.2926144  | -2.8796150 |
| 56 | No | Show | 56 | C | -4.4469526 | -2.0655996 | -1.7331650 |
| 57 | No | Show | 57 | H | -3.2936656 | -1.8345416 | 0.0638480  |
| 58 | No | Show | 58 | C | -4.7645256 | -1.5448916 | -2.9885470 |
| 59 | No | Show | 59 | H | -4.4283346 | 0.0735484  | -4.3741090 |
| 60 | No | Show | 60 | H | -4.8979736 | -2.9969306 | -1.4022070 |
| 61 | No | Show | 61 | H | -5.4573856 | -2.0710526 | -3.6405270 |
| 62 | No | Show | 62 | O | -0.8293040 | -3.1263490 | -0.7891580 |
| 63 | No | Show | 63 | C | -0.7890870 | -3.4713640 | 0.3801320  |
| 64 | No | Show | 64 | H | -0.9401746 | -1.2966046 | 0.7334730  |
| 65 | No | Show | 65 | O | 0.3462650  | -3.4781790 | 1.1079830  |
| 66 | No | Show | 66 | H | 1.0578270  | -3.1875000 | 0.4970730  |
| 67 | No | Show | 67 | N | -1.8831740 | -3.9253870 | 1.0964760  |
| 68 | No | Show | 68 | C | -2.6527550 | -4.9740110 | 0.4372640  |
| 69 | No | Show | 69 | H | -2.1886450 | -5.9613490 | 0.5786630  |
| 70 | No | Show | 70 | H | -3.6631470 | -5.0052800 | 0.8559560  |
| 71 | No | Show | 71 | H | -2.7147890 | -4.7607350 | -0.6290990 |
| 72 | No | Show | 72 | C | -1.7419100 | -4.0985420 | 2.5374010  |
| 73 | No | Show | 73 | H | -2.7419570 | -4.1400690 | 2.9789240  |
| 74 | No | Show | 74 | H | -1.2016180 | -5.0175540 | 2.8059470  |
| 75 | No | Show | 75 | H | -1.2148240 | -3.2460760 | 2.9641180  |
| 76 | No | Show | 76 | H | 4.7314319  | 2.3865081  | 0.7918132  |
| 77 | No | Show | 77 | O | -0.2302655 | 3.2508665  | 0.3292546  |
| 78 | No | Show | 78 | C | 1.4179206  | 5.2892765  | 0.6049986  |
| 79 | No | Show | 79 | H | 1.1188498  | 5.5730364  | -0.3823904 |
| 80 | No | Show | 80 | H | 0.5773801  | 5.3520215  | 1.2641305  |
| 81 | No | Show | 81 | H | 2.2022263  | 5.9583706  | 0.9527364  |

#### TS\_33b\_to\_34b+32

| Row | Highlight | Display | Tag | Symbol | X          | Y          | Z          |
|-----|-----------|---------|-----|--------|------------|------------|------------|
| 1   | No        | Show    | 1   | C      | 2.8124524  | 1.3183864  | 0.6839630  |
| 2   | No        | Show    | 2   | C      | 3.6524196  | 2.4749683  | 0.7248710  |
| 3   | No        | Show    | 3   | C      | 1.4743354  | 1.5897894  | 0.4544390  |
| 4   | No        | Show    | 4   | N      | 3.2045844  | 3.7091490  | 0.7103643  |
| 5   | No        | Show    | 5   | C      | 0.9548676  | 2.9513178  | 0.4342233  |
| 6   | No        | Show    | 6   | N      | 1.9189897  | 3.9225525  | 0.5863212  |
| 7   | No        | Show    | 7   | Pd     | 0.1318111  | -0.1013534 | 0.4340922  |
| 8   | No        | Show    | 8   | P      | -1.9194780 | 0.7304967  | -0.1040653 |
| 9   | No        | Show    | 9   | C      | -1.8572210 | 2.3944727  | -0.8862163 |
| 10  | No        | Show    | 10  | C      | -0.9177870 | 2.6004597  | -1.9073443 |
| 11  | No        | Show    | 11  | C      | -2.7286130 | 3.4337717  | -0.5410203 |
| 12  | No        | Show    | 12  | C      | -0.8626490 | 3.8172847  | -2.5829813 |

---

|    |    |      |    |   |            |            |            |
|----|----|------|----|---|------------|------------|------------|
| 13 | No | Show | 13 | H | -0.2156780 | 1.8084907  | -2.1581323 |
| 14 | No | Show | 14 | C | -2.6593490 | 4.6592257  | -1.2075563 |
| 15 | No | Show | 15 | H | -3.4542270 | 3.2993907  | 0.2559187  |
| 16 | No | Show | 16 | C | -1.7323120 | 4.8518857  | -2.2315303 |
| 17 | No | Show | 17 | H | -0.1261490 | 3.9643837  | -3.3684763 |
| 18 | No | Show | 18 | H | -3.3321300 | 5.4637557  | -0.9215493 |
| 19 | No | Show | 19 | H | -1.6791230 | 5.8076417  | -2.7464023 |
| 20 | No | Show | 20 | C | -2.9844770 | 0.9519507  | 1.3724247  |
| 21 | No | Show | 21 | C | -4.3839410 | 0.9601397  | 1.2931737  |
| 22 | No | Show | 22 | C | -2.3675860 | 1.1608927  | 2.6127707  |
| 23 | No | Show | 23 | C | -5.1509630 | 1.1716427  | 2.4392457  |
| 24 | No | Show | 24 | H | -4.8781980 | 0.7929617  | 0.3399847  |
| 25 | No | Show | 25 | C | -3.1363290 | 1.3830987  | 3.7543317  |
| 26 | No | Show | 26 | H | -1.2818830 | 1.1434567  | 2.6798057  |
| 27 | No | Show | 27 | C | -4.5296530 | 1.3857257  | 3.6704287  |
| 28 | No | Show | 28 | H | -6.2357350 | 1.1685187  | 2.3677497  |
| 29 | No | Show | 29 | H | -2.6457140 | 1.5450307  | 4.7106377  |
| 30 | No | Show | 30 | H | -5.1292530 | 1.5498137  | 4.5622257  |
| 31 | No | Show | 31 | C | -2.9863540 | -0.1783613 | -1.2960663 |
| 32 | No | Show | 32 | C | -3.3124580 | 0.3431007  | -2.5550093 |
| 33 | No | Show | 33 | C | -3.5462320 | -1.4010383 | -0.9010353 |
| 34 | No | Show | 34 | C | -4.1861260 | -0.3427983 | -3.4004143 |
| 35 | No | Show | 35 | H | -2.9067320 | 1.2951397  | -2.8797033 |
| 36 | No | Show | 36 | C | -4.4455350 | -2.0630743 | -1.7332533 |
| 37 | No | Show | 37 | H | -3.2922480 | -1.8320163 | 0.0637597  |
| 38 | No | Show | 38 | C | -4.7631080 | -1.5423663 | -2.9886353 |
| 39 | No | Show | 39 | H | -4.4269170 | 0.0760737  | -4.3741973 |
| 40 | No | Show | 40 | H | -4.8965560 | -2.9944053 | -1.4022953 |
| 41 | No | Show | 41 | H | -5.4559680 | -2.0685273 | -3.6406153 |
| 42 | No | Show | 42 | O | -0.8037578 | -3.0900962 | -0.7952733 |
| 43 | No | Show | 43 | C | -0.7608717 | -3.4414453 | 0.3720340  |
| 44 | No | Show | 44 | H | -0.9531143 | -1.3110288 | 0.7370934  |
| 45 | No | Show | 45 | O | 0.3731583  | -3.4368852 | 1.1019606  |
| 46 | No | Show | 46 | H | 1.0817277  | -3.1327872 | 0.4941123  |
| 47 | No | Show | 47 | N | -1.8498593 | -3.9147790 | 1.0836330  |
| 48 | No | Show | 48 | C | -2.6036823 | -4.9700117 | 0.4168028  |
| 49 | No | Show | 49 | H | -2.1262182 | -5.9516633 | 0.5532442  |
| 50 | No | Show | 50 | H | -3.6142949 | -5.0177190 | 0.8334069  |
| 51 | No | Show | 51 | H | -2.6667463 | -4.7512980 | -0.6483977 |
| 52 | No | Show | 52 | C | -1.7087999 | -4.0945010 | 2.5237737  |
| 53 | No | Show | 53 | H | -2.7089675 | -4.1524575 | 2.9631673  |
| 54 | No | Show | 54 | H | -1.1563341 | -5.0075352 | 2.7879057  |
| 55 | No | Show | 55 | H | -1.1943186 | -3.2373771 | 2.9565011  |
| 56 | No | Show | 56 | H | 4.7314319  | 2.3865081  | 0.7918132  |
| 57 | No | Show | 57 | O | -0.2302655 | 3.2508665  | 0.3292546  |

---

|    |    |      |    |   |           |            |            |
|----|----|------|----|---|-----------|------------|------------|
| 58 | No | Show | 58 | C | 1.4179206 | 5.2892765  | 0.6049986  |
| 59 | No | Show | 59 | H | 1.1188498 | 5.5730364  | -0.3823904 |
| 60 | No | Show | 60 | H | 0.5773801 | 5.3520215  | 1.2641305  |
| 61 | No | Show | 61 | H | 2.2022263 | 5.9583706  | 0.9527364  |
| 62 | No | Show | 62 | C | 3.3053564 | -0.0977732 | 0.9042360  |
| 63 | No | Show | 63 | C | 2.9164258 | -1.1123703 | 0.0291377  |
| 64 | No | Show | 64 | C | 4.1460312 | -0.3878783 | 1.9787838  |
| 65 | No | Show | 65 | C | 3.3675725 | -2.4168778 | 0.2290096  |
| 66 | No | Show | 66 | H | 2.2530261 | -0.8834783 | -0.8174739 |
| 67 | No | Show | 67 | C | 4.5981982 | -1.6925444 | 2.1782859  |
| 68 | No | Show | 68 | H | 4.4528107 | 0.4116958  | 2.6684915  |
| 69 | No | Show | 69 | C | 4.2090205 | -2.7070395 | 1.3037132  |
| 70 | No | Show | 70 | H | 3.0605502 | -3.2167661 | -0.4603469 |
| 71 | No | Show | 71 | H | 5.2613562 | -1.9209049 | 3.0253674  |
| 72 | No | Show | 72 | H | 4.5646533 | -3.7356603 | 1.4610694  |

#### TS\_36a\_to\_35a+32

| Row | Highlight |      | Display | Tag | Symbol     | X          | Y          | Z |
|-----|-----------|------|---------|-----|------------|------------|------------|---|
| 1   | No        | Show | 1       | H   | -2.5707780 | -3.3060920 | -1.7228600 |   |
| 2   | No        | Show | 2       | C   | -2.9995750 | -2.3691750 | -1.3935450 |   |
| 3   | No        | Show | 3       | C   | -4.3392530 | -2.1586390 | -0.9641880 |   |
| 4   | No        | Show | 4       | C   | -2.3327410 | -1.0942880 | -1.3779270 |   |
| 5   | No        | Show | 5       | C   | -4.5057460 | -0.7753550 | -0.6617560 |   |
| 6   | No        | Show | 6       | H   | -5.0951450 | -2.9262330 | -0.8503050 |   |
| 7   | No        | Show | 7       | C   | -3.2687650 | -0.1083990 | -0.9051810 |   |
| 8   | No        | Show | 8       | Fe  | -3.0275120 | -1.6093570 | 0.5019290  |   |
| 9   | No        | Show | 9       | C   | -3.8830910 | -1.4481720 | 2.3390620  |   |
| 10  | No        | Show | 10      | C   | -2.6247700 | -0.7742060 | 2.3353470  |   |
| 11  | No        | Show | 11      | C   | -3.6471940 | -2.8196750 | 2.0163820  |   |
| 12  | No        | Show | 12      | H   | -4.8486590 | -0.9874580 | 2.5069360  |   |
| 13  | No        | Show | 13      | C   | -1.6097460 | -1.7250000 | 2.0192780  |   |
| 14  | No        | Show | 14      | H   | -2.4755650 | 0.2862610  | 2.4965770  |   |
| 15  | No        | Show | 15      | C   | -2.2437620 | -2.9898060 | 1.8126780  |   |
| 16  | No        | Show | 16      | H   | -4.4052190 | -3.5854400 | 1.9057400  |   |
| 17  | No        | Show | 17      | H   | -0.5444590 | -1.5472940 | 1.9422300  |   |
| 18  | No        | Show | 18      | H   | -1.7424530 | -3.9161550 | 1.5601200  |   |
| 19  | No        | Show | 19      | H   | -1.3869820 | -0.8972210 | -1.9030130 |   |
| 20  | No        | Show | 20      | H   | -5.3978640 | -0.2967850 | -0.2842440 |   |
| 21  | No        | Show | 21      | C   | -2.9011550 | 1.2935760  | -0.7096530 |   |
| 22  | No        | Show | 22      | C   | -3.9581890 | 2.2930080  | -0.7851580 |   |
| 23  | No        | Show | 23      | C   | -1.5822020 | 1.6305610  | -0.4533920 |   |
| 24  | No        | Show | 24      | N   | -3.5022080 | 3.6068850  | -0.7183020 |   |
| 25  | No        | Show | 25      | C   | -1.3296920 | 3.0380690  | -0.4376610 |   |
| 26  | No        | Show | 26      | N   | -2.2269490 | 3.9871190  | -0.5745700 |   |
| 27  | No        | Show | 27      | Pd  | -0.2048320 | -0.0229690 | -0.3566030 |   |

---

|    |    |      |    |   |            |            |            |
|----|----|------|----|---|------------|------------|------------|
| 28 | No | Show | 28 | P | 1.8765000  | 0.8305410  | 0.0769510  |
| 29 | No | Show | 29 | O | -5.1755810 | 2.0732710  | -0.8788330 |
| 30 | No | Show | 30 | H | -0.3261520 | 3.4326820  | -0.3328480 |
| 31 | No | Show | 31 | C | 1.9638280  | 2.5813730  | 0.6418160  |
| 32 | No | Show | 32 | C | 0.9724600  | 3.0426770  | 1.5202010  |
| 33 | No | Show | 33 | C | 2.9871790  | 3.4546840  | 0.2529440  |
| 34 | No | Show | 34 | C | 1.0229660  | 4.3393220  | 2.0287030  |
| 35 | No | Show | 35 | H | 0.1542290  | 2.3832270  | 1.8000500  |
| 36 | No | Show | 36 | C | 3.0285150  | 4.7575520  | 0.7523690  |
| 37 | No | Show | 37 | H | 3.7521190  | 3.1275260  | -0.4448720 |
| 38 | No | Show | 38 | C | 2.0519590  | 5.2006230  | 1.6446010  |
| 39 | No | Show | 39 | H | 0.2478700  | 4.6811510  | 2.7093570  |
| 40 | No | Show | 40 | H | 3.8250130  | 5.4272260  | 0.4379250  |
| 41 | No | Show | 41 | H | 2.0843950  | 6.2171610  | 2.0281390  |
| 42 | No | Show | 42 | C | 2.9695790  | 0.7670340  | -1.3960280 |
| 43 | No | Show | 43 | C | 4.3668020  | 0.7327750  | -1.2890190 |
| 44 | No | Show | 44 | C | 2.3825610  | 0.7969190  | -2.6672330 |
| 45 | No | Show | 45 | C | 5.1604420  | 0.7239910  | -2.4364470 |
| 46 | No | Show | 46 | H | 4.8385540  | 0.7016610  | -0.3104290 |
| 47 | No | Show | 47 | C | 3.1777720  | 0.7997000  | -3.8124070 |
| 48 | No | Show | 48 | H | 1.2982940  | 0.8050310  | -2.7557250 |
| 49 | No | Show | 49 | C | 4.5684780  | 0.7608310  | -3.6996690 |
| 50 | No | Show | 50 | H | 6.2428480  | 0.6894380  | -2.3408260 |
| 51 | No | Show | 51 | H | 2.7092570  | 0.8216610  | -4.7930230 |
| 52 | No | Show | 52 | H | 5.1883400  | 0.7542190  | -4.5927080 |
| 53 | No | Show | 53 | C | 2.8568450  | 0.0188220  | 1.4057450  |
| 54 | No | Show | 54 | C | 3.1035660  | 0.6499890  | 2.6316190  |
| 55 | No | Show | 55 | C | 3.4068590  | -1.2485360 | 1.1678200  |
| 56 | No | Show | 56 | C | 3.8892110  | 0.0251230  | 3.6014370  |
| 57 | No | Show | 57 | H | 2.6979070  | 1.6362410  | 2.8348120  |
| 58 | No | Show | 58 | C | 4.2114770  | -1.8562470 | 2.1275610  |
| 59 | No | Show | 59 | H | 3.1959980  | -1.7675190 | 0.2373850  |
| 60 | No | Show | 60 | C | 4.4519870  | -1.2249390 | 3.3493620  |
| 61 | No | Show | 61 | H | 4.0682490  | 0.5262990  | 4.5493430  |
| 62 | No | Show | 62 | H | 4.6410420  | -2.8334510 | 1.9236800  |
| 63 | No | Show | 63 | H | 5.0716420  | -1.7066460 | 4.1017570  |
| 64 | No | Show | 64 | O | 0.9950830  | -3.0949710 | 0.8674540  |
| 65 | No | Show | 65 | C | -4.4880540 | 4.6736410  | -0.8187690 |
| 66 | No | Show | 66 | H | -5.0763390 | 4.5539890  | -1.7312840 |
| 67 | No | Show | 67 | H | -5.1742460 | 4.6383080  | 0.0314980  |
| 68 | No | Show | 68 | H | -3.9446480 | 5.6168810  | -0.8307820 |
| 69 | No | Show | 69 | C | 0.9628460  | -3.4330430 | -0.3017030 |
| 70 | No | Show | 70 | H | 0.9579130  | -1.2166970 | -0.7197750 |
| 71 | No | Show | 71 | O | -0.1714390 | -3.3911950 | -1.0400130 |
| 72 | No | Show | 72 | H | -0.8836010 | -3.1219840 | -0.4175820 |

---

|    |    |      |    |   |           |            |            |
|----|----|------|----|---|-----------|------------|------------|
| 73 | No | Show | 73 | N | 2.0404260 | -3.9709480 | -0.9888750 |
| 74 | No | Show | 74 | C | 2.7088020 | -5.0908320 | -0.3396890 |
| 75 | No | Show | 75 | H | 2.1893810 | -6.0396410 | -0.5413960 |
| 76 | No | Show | 76 | H | 3.7353170 | -5.1720200 | -0.7098670 |
| 77 | No | Show | 77 | H | 2.7376030 | -4.9213370 | 0.7368350  |
| 78 | No | Show | 78 | C | 1.9664280 | -4.0472790 | -2.4421210 |
| 79 | No | Show | 79 | H | 2.9839430 | -4.1247400 | -2.8363760 |
| 80 | No | Show | 80 | H | 1.3845240 | -4.9105630 | -2.7960230 |
| 81 | No | Show | 81 | H | 1.5145910 | -3.1382660 | -2.8380520 |

### TS\_36b\_to\_35b+32

| Row | Highlight |      | Display Tag | Symbol | X          | Y          | Z          |
|-----|-----------|------|-------------|--------|------------|------------|------------|
| 1   | No        | Show | 1           | C      | -2.9011550 | 1.2935760  | -0.7096530 |
| 2   | No        | Show | 2           | C      | -3.9581890 | 2.2930080  | -0.7851580 |
| 3   | No        | Show | 3           | C      | -1.5822020 | 1.6305610  | -0.4533920 |
| 4   | No        | Show | 4           | N      | -3.5022080 | 3.6068850  | -0.7183020 |
| 5   | No        | Show | 5           | C      | -1.3296920 | 3.0380690  | -0.4376610 |
| 6   | No        | Show | 6           | N      | -2.2269490 | 3.9871190  | -0.5745700 |
| 7   | No        | Show | 7           | Pd     | -0.2048320 | -0.0229690 | -0.3566030 |
| 8   | No        | Show | 8           | P      | 1.8765000  | 0.8305410  | 0.0769510  |
| 9   | No        | Show | 9           | O      | -5.1755810 | 2.0732710  | -0.8788330 |
| 10  | No        | Show | 10          | H      | -0.3261520 | 3.4326820  | -0.3328480 |
| 11  | No        | Show | 11          | C      | 1.9638280  | 2.5813730  | 0.6418160  |
| 12  | No        | Show | 12          | C      | 0.9724600  | 3.0426770  | 1.5202010  |
| 13  | No        | Show | 13          | C      | 2.9871790  | 3.4546840  | 0.2529440  |
| 14  | No        | Show | 14          | C      | 1.0229660  | 4.3393220  | 2.0287030  |
| 15  | No        | Show | 15          | H      | 0.1542290  | 2.3832270  | 1.8000500  |
| 16  | No        | Show | 16          | C      | 3.0285150  | 4.7575520  | 0.7523690  |
| 17  | No        | Show | 17          | H      | 3.7521190  | 3.1275260  | -0.4448720 |
| 18  | No        | Show | 18          | C      | 2.0519590  | 5.2006230  | 1.6446010  |
| 19  | No        | Show | 19          | H      | 0.2478700  | 4.6811510  | 2.7093570  |
| 20  | No        | Show | 20          | H      | 3.8250130  | 5.4272260  | 0.4379250  |
| 21  | No        | Show | 21          | H      | 2.0843950  | 6.2171610  | 2.0281390  |
| 22  | No        | Show | 22          | C      | 2.9695790  | 0.7670340  | -1.3960280 |
| 23  | No        | Show | 23          | C      | 4.3668020  | 0.7327750  | -1.2890190 |
| 24  | No        | Show | 24          | C      | 2.3825610  | 0.7969190  | -2.6672330 |
| 25  | No        | Show | 25          | C      | 5.1604420  | 0.7239910  | -2.4364470 |
| 26  | No        | Show | 26          | H      | 4.8385540  | 0.7016610  | -0.3104290 |
| 27  | No        | Show | 27          | C      | 3.1777720  | 0.7997000  | -3.8124070 |
| 28  | No        | Show | 28          | H      | 1.2982940  | 0.8050310  | -2.7557250 |
| 29  | No        | Show | 29          | C      | 4.5684780  | 0.7608310  | -3.6996690 |
| 30  | No        | Show | 30          | H      | 6.2428480  | 0.6894380  | -2.3408260 |
| 31  | No        | Show | 31          | H      | 2.7092570  | 0.8216610  | -4.7930230 |
| 32  | No        | Show | 32          | H      | 5.1883400  | 0.7542190  | -4.5927080 |
| 33  | No        | Show | 33          | C      | 2.8568450  | 0.0188220  | 1.4057450  |

---

|    |    |      |    |   |            |            |            |
|----|----|------|----|---|------------|------------|------------|
| 34 | No | Show | 34 | C | 3.1035660  | 0.6499890  | 2.6316190  |
| 35 | No | Show | 35 | C | 3.4068590  | -1.2485360 | 1.1678200  |
| 36 | No | Show | 36 | C | 3.8892110  | 0.0251230  | 3.6014370  |
| 37 | No | Show | 37 | H | 2.6979070  | 1.6362410  | 2.8348120  |
| 38 | No | Show | 38 | C | 4.2114770  | -1.8562470 | 2.1275610  |
| 39 | No | Show | 39 | H | 3.1959980  | -1.7675190 | 0.2373850  |
| 40 | No | Show | 40 | C | 4.4519870  | -1.2249390 | 3.3493620  |
| 41 | No | Show | 41 | H | 4.0682490  | 0.5262990  | 4.5493430  |
| 42 | No | Show | 42 | H | 4.6410420  | -2.8334510 | 1.9236800  |
| 43 | No | Show | 43 | H | 5.0716420  | -1.7066460 | 4.1017570  |
| 44 | No | Show | 44 | O | 0.9958361  | -3.0641146 | 0.8612168  |
| 45 | No | Show | 45 | C | -4.4880540 | 4.6736410  | -0.8187690 |
| 46 | No | Show | 46 | H | -5.0763390 | 4.5539890  | -1.7312840 |
| 47 | No | Show | 47 | H | -5.1742460 | 4.6383080  | 0.0314980  |
| 48 | No | Show | 48 | H | -3.9446480 | 5.6168810  | -0.8307820 |
| 49 | No | Show | 49 | C | 0.9635991  | -3.4021866 | -0.3079402 |
| 50 | No | Show | 50 | H | 1.0154954  | -1.2758138 | -0.7377603 |
| 51 | No | Show | 51 | O | -0.1706859 | -3.3603386 | -1.0462502 |
| 52 | No | Show | 52 | H | -0.8828479 | -3.0911276 | -0.4238192 |
| 53 | No | Show | 53 | N | 2.0411791  | -3.9400916 | -0.9951122 |
| 54 | No | Show | 54 | C | 2.7095551  | -5.0599756 | -0.3459262 |
| 55 | No | Show | 55 | H | 2.1901341  | -6.0087846 | -0.5476332 |
| 56 | No | Show | 56 | H | 3.7360701  | -5.1411636 | -0.7161042 |
| 57 | No | Show | 57 | H | 2.7383561  | -4.8904806 | 0.7305978  |
| 58 | No | Show | 58 | C | 1.9671811  | -4.0164226 | -2.4483582 |
| 59 | No | Show | 59 | H | 2.9846961  | -4.0938836 | -2.8426132 |
| 60 | No | Show | 60 | H | 1.3852771  | -4.8797066 | -2.8022602 |
| 61 | No | Show | 61 | H | 1.5153441  | -3.1074096 | -2.8442892 |
| 62 | No | Show | 62 | C | -3.2706505 | -0.1155899 | -0.9061839 |
| 63 | No | Show | 63 | C | -4.4782430 | -0.5971830 | -0.3999627 |
| 64 | No | Show | 64 | C | -2.4140778 | -0.9712082 | -1.5988228 |
| 65 | No | Show | 65 | C | -4.8287920 | -1.9342700 | -0.5858006 |
| 66 | No | Show | 66 | H | -5.1529752 | 0.0774387  | 0.1467217  |
| 67 | No | Show | 67 | C | -2.7650389 | -2.3084923 | -1.7856578 |
| 68 | No | Show | 68 | H | -1.4623498 | -0.5917608 | -1.9980251 |
| 69 | No | Show | 69 | C | -3.9721073 | -2.7901548 | -1.2791755 |
| 70 | No | Show | 70 | H | -5.7803242 | -2.3140906 | -0.1862767 |
| 71 | No | Show | 71 | H | -2.0896593 | -2.9827778 | -2.3321700 |
| 72 | No | Show | 72 | H | -4.2487429 | -3.8443467 | -1.4256286 |

| Row | Highlight |      | Display Tag |   | Symbol    | X | Y         | Z          |
|-----|-----------|------|-------------|---|-----------|---|-----------|------------|
| 1   | No        | Show | 1           | H | 3.1320070 |   | 1.6607800 | 1.2503350  |
| 2   | No        | Show | 2           | C | 2.2476910 |   | 1.6511140 | 0.6218690  |
| 3   | No        | Show | 3           | C | 2.2318780 |   | 1.5604800 | -0.8068450 |

---

|    |    |      |    |    |            |            |            |
|----|----|------|----|----|------------|------------|------------|
| 4  | No | Show | 4  | C  | 0.8881950  | 1.6722070  | 1.0683350  |
| 5  | No | Show | 5  | C  | 0.8602640  | 1.5220820  | -1.2201910 |
| 6  | No | Show | 6  | H  | 3.1001510  | 1.4860290  | -1.4531510 |
| 7  | No | Show | 7  | C  | 0.0086900  | 1.5794540  | -0.0613140 |
| 8  | No | Show | 8  | Fe | 1.2599850  | -0.0314140 | 0.0138720  |
| 9  | No | Show | 9  | C  | 0.8337250  | -1.6907510 | -1.0810000 |
| 10 | No | Show | 10 | C  | -0.1004250 | -1.5770740 | 0.0015510  |
| 11 | No | Show | 11 | C  | 2.1673130  | -1.7607840 | -0.5638500 |
| 12 | No | Show | 12 | H  | 0.5670340  | -1.6719540 | -2.1318680 |
| 13 | No | Show | 13 | C  | 0.6881220  | -1.5890110 | 1.1990890  |
| 14 | No | Show | 14 | C  | 2.0763490  | -1.6943110 | 0.8636850  |
| 15 | No | Show | 15 | H  | 3.0824730  | -1.8119500 | -1.1447620 |
| 16 | No | Show | 16 | H  | 0.2841920  | -1.4765060 | 2.1988040  |
| 17 | No | Show | 17 | H  | 2.9101760  | -1.6874610 | 1.5579670  |
| 18 | No | Show | 18 | H  | 0.5550560  | 1.6826690  | 2.0994960  |
| 19 | No | Show | 19 | H  | 0.5197640  | 1.3766390  | -2.2405230 |
| 20 | No | Show | 20 | O  | -2.4210280 | -1.4172960 | 1.1632030  |
| 21 | No | Show | 21 | H  | -2.3612500 | -0.5193300 | 1.5421660  |
| 22 | No | Show | 22 | O  | -1.9178230 | 0.0778420  | -0.7569500 |
| 23 | No | Show | 23 | H  | -2.8343150 | 0.1168640  | -1.0734550 |
| 24 | No | Show | 24 | O  | -2.3259980 | -2.3236010 | -1.0298430 |
| 25 | No | Show | 25 | H  | -3.1224890 | -2.6228400 | -0.5700760 |
| 26 | No | Show | 26 | B  | -1.7076300 | -1.4035310 | -0.0929040 |
| 27 | No | Show | 27 | B  | -1.5924270 | 1.4352540  | -0.0142720 |
| 28 | No | Show | 28 | O  | -2.3476330 | 2.4605580  | -0.7401670 |
| 29 | No | Show | 29 | H  | -1.7466470 | 2.9020970  | -1.3516760 |
| 30 | No | Show | 30 | O  | -2.0983420 | 1.3579780  | 1.3602040  |
| 31 | No | Show | 31 | H  | -2.8696970 | 1.9388450  | 1.3924050  |

#### 45

| Row | Highlight |      | Display | Tag | Symbol     | X | Y          | Z          |
|-----|-----------|------|---------|-----|------------|---|------------|------------|
| 1   | No        | Show | 1       | H   | 3.1320070  |   | 1.6607800  | 1.2503350  |
| 2   | No        | Show | 2       | C   | 2.2476910  |   | 1.6511140  | 0.6218690  |
| 3   | No        | Show | 3       | C   | 2.2318780  |   | 1.5604800  | -0.8068450 |
| 4   | No        | Show | 4       | C   | 0.8881950  |   | 1.6722070  | 1.0683350  |
| 5   | No        | Show | 5       | C   | 0.8602640  |   | 1.5220820  | -1.2201910 |
| 6   | No        | Show | 6       | H   | 3.1001510  |   | 1.4860290  | -1.4531510 |
| 7   | No        | Show | 7       | C   | 0.0086900  |   | 1.5794540  | -0.0613140 |
| 8   | No        | Show | 8       | Fe  | 1.2599850  |   | -0.0314140 | 0.0138720  |
| 9   | No        | Show | 9       | C   | 0.8337250  |   | -1.6907510 | -1.0810000 |
| 10  | No        | Show | 10      | C   | -0.1004250 |   | -1.5770740 | 0.0015510  |
| 11  | No        | Show | 11      | C   | 2.1673130  |   | -1.7607840 | -0.5638500 |
| 12  | No        | Show | 12      | H   | 0.5670340  |   | -1.6719540 | -2.1318680 |
| 13  | No        | Show | 13      | C   | 0.6881220  |   | -1.5890110 | 1.1990890  |
| 14  | No        | Show | 14      | C   | 2.0763490  |   | -1.6943110 | 0.8636850  |



---

|    |    |      |    |   |            |            |            |
|----|----|------|----|---|------------|------------|------------|
| 15 | No | Show | 15 | H | 3.0824730  | -1.8119500 | -1.1447620 |
| 16 | No | Show | 16 | H | 0.2841920  | -1.4765060 | 2.1988040  |
| 17 | No | Show | 17 | H | 2.9101760  | -1.6874610 | 1.5579670  |
| 18 | No | Show | 18 | H | 0.5550560  | 1.6826690  | 2.0994960  |
| 19 | No | Show | 19 | H | 0.5197640  | 1.3766390  | -2.2405230 |
| 20 | No | Show | 20 | O | -2.4210280 | -1.4172960 | 1.1632030  |
| 21 | No | Show | 21 | H | -2.3612500 | -0.5193300 | 1.5421660  |
| 22 | No | Show | 22 | O | -1.9178230 | 0.0778420  | -0.7569500 |
| 23 | No | Show | 23 | H | -2.8343150 | 0.1168640  | -1.0734550 |
| 24 | No | Show | 24 | O | -2.3259980 | -2.3236010 | -1.0298430 |
| 25 | No | Show | 25 | H | -3.1224890 | -2.6228400 | -0.5700760 |
| 26 | No | Show | 26 | B | -1.7076300 | -1.4035310 | -0.0929040 |
| 27 | No | Show | 27 | B | -1.5924270 | 1.4352540  | -0.0142720 |
| 28 | No | Show | 28 | O | -2.3476330 | 2.4605580  | -0.7401670 |
| 29 | No | Show | 29 | H | -1.7466470 | 2.9020970  | -1.3516760 |
| 30 | No | Show | 30 | O | -2.0983420 | 1.3579780  | 1.3602040  |
| 31 | No | Show | 31 | H | -2.8696970 | 1.9388450  | 1.3924050  |

#### 49

| Row | Highlight |      | Display | Tag | Symbol     | X | Y          | Z          |
|-----|-----------|------|---------|-----|------------|---|------------|------------|
| 1   | No        | Show | 1       | H   | 2.2974260  |   | 1.2939360  | 0.2637920  |
| 2   | No        | Show | 2       | C   | 1.2711210  |   | 1.6697420  | 0.1996320  |
| 3   | No        | Show | 3       | C   | 0.5943980  |   | 2.0811880  | -0.9916010 |
| 4   | No        | Show | 4       | C   | 0.2989330  |   | 1.6486590  | 1.2503560  |
| 5   | No        | Show | 5       | C   | -0.7887700 |   | 2.3040710  | -0.6771940 |
| 6   | No        | Show | 6       | H   | 1.0421300  |   | 2.1304260  | -1.9767340 |
| 7   | No        | Show | 7       | C   | -0.9745140 |   | 2.0329770  | 0.7131500  |
| 8   | No        | Show | 8       | Fe  | -0.2645560 |   | 0.3704070  | -0.2432310 |
| 9   | No        | Show | 9       | C   | -1.2598420 |   | -0.9222930 | -1.4654130 |
| 10  | No        | Show | 10      | C   | -1.8043090 |   | -0.9885790 | -0.1381310 |
| 11  | No        | Show | 11      | C   | 0.1406160  |   | -1.2362200 | -1.4355660 |
| 12  | No        | Show | 12      | H   | -1.8190900 |   | -0.5821440 | -2.3293660 |
| 13  | No        | Show | 13      | C   | -0.6991050 |   | -1.3714800 | 0.7031230  |
| 14  | No        | Show | 14      | C   | 0.4987680  |   | -1.5126880 | -0.0789530 |
| 15  | No        | Show | 15      | H   | 0.8451850  |   | -1.1821590 | -2.2574970 |
| 16  | No        | Show | 16      | H   | -0.7520870 |   | -1.4308830 | 1.7840560  |
| 17  | No        | Show | 17      | H   | 1.5232790  |   | -1.6492870 | 0.2687230  |
| 18  | No        | Show | 18      | H   | 0.4817160  |   | 1.3021420  | 2.2598240  |
| 19  | No        | Show | 19      | H   | -1.5880180 |   | 2.5202430  | -1.3748590 |
| 20  | No        | Show | 20      | H   | -1.9291550 |   | 1.9681090  | 1.2213890  |
| 21  | No        | Show | 21      | O   | -4.2435430 |   | -1.7611050 | 0.0819050  |
| 22  | No        | Show | 22      | H   | -4.1112850 |   | -2.3469030 | 0.8384020  |
| 23  | No        | Show | 23      | O   | -3.2865390 |   | -0.1765810 | 1.7009040  |
| 24  | No        | Show | 24      | H   | -4.1565870 |   | 0.1983450  | 1.8977710  |
| 25  | No        | Show | 25      | O   | -3.8476960 |   | 0.4751920  | -0.6027520 |

---

|    |    |      |    |    |            |            |            |
|----|----|------|----|----|------------|------------|------------|
| 26 | No | Show | 26 | H  | -4.6495820 | 0.1171240  | -1.0061090 |
| 27 | No | Show | 27 | B  | -3.3515050 | -0.5924240 | 0.2840940  |
| 28 | No | Show | 28 | Br | 4.1088710  | -0.5582770 | 0.2113500  |

## 50

| Row | Highlight |      | Display Tag |    | Symbol X   | Y          | Z          |
|-----|-----------|------|-------------|----|------------|------------|------------|
| 1   | No        | Show | 1           | H  | 2.2974260  | 1.2939360  | 0.2637920  |
| 2   | No        | Show | 2           | C  | 1.2711210  | 1.6697420  | 0.1996320  |
| 3   | No        | Show | 3           | C  | 0.5943980  | 2.0811880  | -0.9916010 |
| 4   | No        | Show | 4           | C  | 0.2989330  | 1.6486590  | 1.2503560  |
| 5   | No        | Show | 5           | C  | -0.7887700 | 2.3040710  | -0.6771940 |
| 6   | No        | Show | 6           | H  | 1.0421300  | 2.1304260  | -1.9767340 |
| 7   | No        | Show | 7           | C  | -0.9745140 | 2.0329770  | 0.7131500  |
| 8   | No        | Show | 8           | Fe | -0.2645560 | 0.3704070  | -0.2432310 |
| 9   | No        | Show | 9           | C  | -1.2598420 | -0.9222930 | -1.4654130 |
| 10  | No        | Show | 10          | C  | -1.8043090 | -0.9885790 | -0.1381310 |
| 11  | No        | Show | 11          | C  | 0.1406160  | -1.2362200 | -1.4355660 |
| 12  | No        | Show | 12          | H  | -1.8190900 | -0.5821440 | -2.3293660 |
| 13  | No        | Show | 13          | C  | -0.6991050 | -1.3714800 | 0.7031230  |
| 14  | No        | Show | 14          | C  | 0.4987680  | -1.5126880 | -0.0789530 |
| 15  | No        | Show | 15          | H  | 0.8451850  | -1.1821590 | -2.2574970 |
| 16  | No        | Show | 16          | H  | -0.7520870 | -1.4308830 | 1.7840560  |
| 17  | No        | Show | 17          | H  | 1.5232790  | -1.6492870 | 0.2687230  |
| 18  | No        | Show | 18          | H  | 0.4817160  | 1.3021420  | 2.2598240  |
| 19  | No        | Show | 19          | H  | -1.5880180 | 2.5202430  | -1.3748590 |
| 20  | No        | Show | 20          | H  | -1.9291550 | 1.9681090  | 1.2213890  |
| 21  | No        | Show | 21          | O  | -4.2435430 | -1.7611050 | 0.0819050  |
| 22  | No        | Show | 22          | H  | -4.1112850 | -2.3469030 | 0.8384020  |
| 23  | No        | Show | 23          | O  | -3.2865390 | -0.1765810 | 1.7009040  |
| 24  | No        | Show | 24          | H  | -4.1565870 | 0.1983450  | 1.8977710  |
| 25  | No        | Show | 25          | O  | -3.8476960 | 0.4751920  | -0.6027520 |
| 26  | No        | Show | 26          | H  | -4.6495820 | 0.1171240  | -1.0061090 |
| 27  | No        | Show | 27          | B  | -3.3515050 | -0.5924240 | 0.2840940  |
| 28  | No        | Show | 28          | Br | 4.1088710  | -0.5582770 | 0.2113500  |

## 51

| Row | Highlight |      | Display Tag |    | Symbol X   | Y          | Z          |
|-----|-----------|------|-------------|----|------------|------------|------------|
| 1   | No        | Show | 1           | O  | 3.2937030  | 1.4392210  | -0.7330770 |
| 2   | No        | Show | 2           | H  | 4.2584260  | 1.5031350  | -0.7307610 |
| 3   | No        | Show | 3           | O  | 3.1738830  | -0.9243380 | -1.4356220 |
| 4   | No        | Show | 4           | H  | 2.7997620  | -0.5097960 | -2.2235850 |
| 5   | No        | Show | 5           | B  | 3.0090850  | 0.0566640  | -0.3259720 |
| 6   | No        | Show | 6           | Br | -3.2343930 | 0.0358470  | -0.5176460 |
| 7   | No        | Show | 7           | C  | 1.4670120  | 0.0165900  | 0.2490570  |
| 8   | No        | Show | 8           | C  | 0.8012170  | -1.2247780 | 0.4328360  |

---

|    |    |      |    |   |            |            |           |
|----|----|------|----|---|------------|------------|-----------|
| 9  | No | Show | 9  | C | 0.7570420  | 1.1844080  | 0.6249650 |
| 10 | No | Show | 10 | C | -0.4744080 | -1.3048540 | 0.9573760 |
| 11 | No | Show | 11 | H | 1.3232000  | -2.1325380 | 0.1365880 |
| 12 | No | Show | 12 | C | -0.5208820 | 1.1271600  | 1.1520500 |
| 13 | No | Show | 13 | H | 1.2531880  | 2.1414500  | 0.4831950 |
| 14 | No | Show | 14 | C | -1.1596550 | -0.1241820 | 1.3351290 |
| 15 | No | Show | 15 | H | -0.9685910 | -2.2654110 | 1.0858520 |
| 16 | No | Show | 16 | H | -1.0526220 | 2.0348700  | 1.4293600 |
| 17 | No | Show | 17 | H | -2.0744270 | -0.1877490 | 1.9146280 |
| 18 | No | Show | 18 | O | 3.9287090  | -0.3784270 | 0.7505790 |
| 19 | No | Show | 19 | H | 4.2270750  | -1.2596400 | 0.4886640 |

### 53

| Row | Highlight |      | Display Tag |    | Symbol X   | Y          | Z          |
|-----|-----------|------|-------------|----|------------|------------|------------|
| 1   | No        | Show | 1           | O  | 3.0094840  | -1.5707020 | -0.0637030 |
| 2   | No        | Show | 2           | H  | 3.1866200  | -2.5230590 | -0.1021430 |
| 3   | No        | Show | 3           | O  | 0.8410200  | -2.4189190 | 0.3211490  |
| 4   | No        | Show | 4           | H  | -0.0979680 | -2.1597710 | 0.2718900  |
| 5   | No        | Show | 5           | B  | 1.6746260  | -1.3501300 | 0.1450790  |
| 6   | No        | Show | 6           | Br | -1.9736630 | -0.5682020 | -0.2766610 |
| 7   | No        | Show | 7           | C  | 1.1644810  | 0.1414280  | 0.1650380  |
| 8   | No        | Show | 8           | C  | 0.0847540  | 0.5413340  | 1.0037830  |
| 9   | No        | Show | 9           | C  | 1.7339360  | 1.1089210  | -0.6618290 |
| 10  | No        | Show | 10          | C  | -0.3869150 | 1.8753490  | 0.9982450  |
| 11  | No        | Show | 11          | H  | -0.2530660 | -0.1228690 | 1.7946550  |
| 12  | No        | Show | 12          | C  | 1.2480420  | 2.4235020  | -0.6827910 |
| 13  | No        | Show | 13          | H  | 2.5682320  | 0.8359880  | -1.3024110 |
| 14  | No        | Show | 14          | C  | 0.1847520  | 2.8068360  | 0.1436560  |
| 15  | No        | Show | 15          | H  | -1.1977110 | 2.1569380  | 1.6636440  |
| 16  | No        | Show | 16          | H  | 1.7031150  | 3.1541960  | -1.3469140 |
| 17  | No        | Show | 17          | H  | -0.1824780 | 3.8290610  | 0.1228550  |

### 54

| Row | Highlight |      | Display Tag |    | Symbol X   | Y          | Z          |
|-----|-----------|------|-------------|----|------------|------------|------------|
| 1   | No        | Show | 1           | H  | 1.0339800  | -1.8562650 | -0.9547030 |
| 2   | No        | Show | 2           | C  | 0.0477450  | -1.8162560 | -0.5107530 |
| 3   | No        | Show | 3           | C  | -0.2079050 | -1.7106650 | 0.8910970  |
| 4   | No        | Show | 4           | C  | -1.1906320 | -1.7199640 | -1.1960370 |
| 5   | No        | Show | 5           | C  | -1.6188820 | -1.5944090 | 1.0710940  |
| 6   | No        | Show | 6           | H  | 0.5544810  | -1.6890100 | 1.6585950  |
| 7   | No        | Show | 7           | C  | -2.2280960 | -1.5856970 | -0.2219170 |
| 8   | No        | Show | 8           | Fe | -0.9413670 | 0.0000530  | -0.0149050 |
| 9   | No        | Show | 9           | C  | -1.6185110 | 1.5947920  | 1.0709640  |
| 10  | No        | Show | 10          | C  | -2.2275480 | 1.5862310  | -0.2221310 |
| 11  | No        | Show | 11          | C  | -0.2074600 | 1.7105540  | 0.8911480  |

---

|    |    |      |    |    |            |            |            |
|----|----|------|----|----|------------|------------|------------|
| 12 | No | Show | 12 | H  | -2.1347030 | 1.4835850  | 2.0165900  |
| 13 | No | Show | 13 | C  | -1.1898610 | 1.7201350  | -1.1960840 |
| 14 | No | Show | 14 | C  | 0.0484540  | 1.8160260  | -0.5106380 |
| 15 | No | Show | 15 | H  | 0.5546660  | 1.6886640  | 1.6588960  |
| 16 | No | Show | 16 | H  | -1.3212600 | 1.7089720  | -2.2711110 |
| 17 | No | Show | 17 | H  | 1.0348920  | 1.8550370  | -0.9542450 |
| 18 | No | Show | 18 | H  | -1.3223240 | -1.7089860 | -2.2710280 |
| 19 | No | Show | 19 | H  | -2.1350280 | -1.4830710 | 2.0167310  |
| 20 | No | Show | 20 | H  | -3.2841620 | -1.4643120 | -0.4296670 |
| 21 | No | Show | 21 | Br | 2.7752780  | -0.0001610 | -0.0015060 |
| 22 | No | Show | 22 | H  | -3.2835640 | 1.4651460  | -0.43029   |

## 56

| Row | Highlight |      | Display Tag |    | Symbol     | X          | Y          | Z |
|-----|-----------|------|-------------|----|------------|------------|------------|---|
| 1   | No        | Show | 1           | H  | 2.9954070  | -2.7054490 | 2.6331510  |   |
| 2   | No        | Show | 2           | C  | 3.2483110  | -1.8207280 | 2.0617290  |   |
| 3   | No        | Show | 3           | C  | 4.5241510  | -1.5125810 | 1.5019010  |   |
| 4   | No        | Show | 4           | C  | 2.3619960  | -0.7522350 | 1.7354120  |   |
| 5   | No        | Show | 5           | C  | 4.4252430  | -0.2628160 | 0.8208620  |   |
| 6   | No        | Show | 6           | H  | 5.4078400  | -2.1372080 | 1.5530370  |   |
| 7   | No        | Show | 7           | C  | 3.0872450  | 0.2183640  | 0.9514660  |   |
| 8   | No        | Show | 8           | Fe | 3.1249230  | -1.6448330 | 0.0289570  |   |
| 9   | No        | Show | 9           | C  | 3.8803240  | -1.9251530 | -1.8447210 |   |
| 10  | No        | Show | 10          | C  | 2.5238660  | -1.5004330 | -1.9422410 |   |
| 11  | No        | Show | 11          | C  | 3.9098320  | -3.1441930 | -1.0986500 |   |
| 12  | No        | Show | 12          | H  | 4.7413100  | -1.3925770 | -2.2289730 |   |
| 13  | No        | Show | 13          | C  | 1.7098350  | -2.4622370 | -1.2622300 |   |
| 14  | No        | Show | 14          | H  | 2.1731850  | -0.5923270 | -2.4172220 |   |
| 15  | No        | Show | 15          | C  | 2.5708850  | -3.4699520 | -0.7267780 |   |
| 16  | No        | Show | 16          | H  | 4.7973250  | -3.7011390 | -0.8247930 |   |
| 17  | No        | Show | 17          | H  | 0.6233460  | -2.4759000 | -1.2205010 |   |
| 18  | No        | Show | 18          | H  | 2.2618160  | -4.3226100 | -0.1347950 |   |
| 19  | No        | Show | 19          | H  | 1.3503670  | -0.6322170 | 2.1189300  |   |
| 20  | No        | Show | 20          | H  | 5.2107210  | 0.2384290  | 0.2731500  |   |
| 21  | No        | Show | 21          | C  | 2.4888580  | 1.4337510  | 0.3784470  |   |
| 22  | No        | Show | 22          | C  | 3.3316550  | 2.6065790  | 0.1813710  |   |
| 23  | No        | Show | 23          | C  | 1.1592810  | 1.4590540  | 0.0144820  |   |
| 24  | No        | Show | 24          | N  | 2.6485120  | 3.7216580  | -0.3153410 |   |
| 25  | No        | Show | 25          | C  | 0.6446730  | 2.6854890  | -0.4917530 |   |
| 26  | No        | Show | 26          | N  | 1.3534140  | 3.7798600  | -0.6495460 |   |
| 27  | No        | Show | 27          | Pd | 0.2095180  | -0.4326150 | 0.1004850  |   |
| 28  | No        | Show | 28          | P  | -2.1234330 | -0.0990430 | 0.0419450  |   |
| 29  | No        | Show | 29          | O  | 4.5475020  | 2.6872170  | 0.4010840  |   |
| 30  | No        | Show | 30          | H  | -0.3944440 | 2.7872250  | -0.7945110 |   |
| 31  | No        | Show | 31          | C  | -2.6989280 | 1.0119050  | -1.3012330 |   |

---

|    |    |      |    |   |            |            |            |
|----|----|------|----|---|------------|------------|------------|
| 32 | No | Show | 32 | C | -2.0963710 | 0.8745590  | -2.5610630 |
| 33 | No | Show | 33 | C | -3.6882610 | 1.9875880  | -1.1233400 |
| 34 | No | Show | 34 | C | -2.4928520 | 1.6787500  | -3.6276200 |
| 35 | No | Show | 35 | H | -1.3040820 | 0.1416810  | -2.6998480 |
| 36 | No | Show | 36 | C | -4.0739040 | 2.8025760  | -2.1895010 |
| 37 | No | Show | 37 | H | -4.1545440 | 2.1203280  | -0.1508970 |
| 38 | No | Show | 38 | C | -3.4821010 | 2.6473570  | -3.4431750 |
| 39 | No | Show | 39 | H | -2.0176820 | 1.5607290  | -4.5981280 |
| 40 | No | Show | 40 | H | -4.8363850 | 3.5622890  | -2.0365950 |
| 41 | No | Show | 41 | H | -3.7816850 | 3.2853840  | -4.2706440 |
| 42 | No | Show | 42 | C | -2.8240270 | 0.6360280  | 1.5730930  |
| 43 | No | Show | 43 | C | -4.1030820 | 0.3177600  | 2.0513950  |
| 44 | No | Show | 44 | C | -2.0380260 | 1.5538960  | 2.2851300  |
| 45 | No | Show | 45 | C | -4.5884250 | 0.9133130  | 3.2162420  |
| 46 | No | Show | 46 | H | -4.7208290 | -0.4010470 | 1.5192910  |
| 47 | No | Show | 47 | C | -2.5301900 | 2.1559300  | 3.4425970  |
| 48 | No | Show | 48 | H | -1.0357920 | 1.7891290  | 1.9338010  |
| 49 | No | Show | 49 | C | -3.8054060 | 1.8358750  | 3.9119500  |
| 50 | No | Show | 50 | H | -5.5799200 | 0.6547370  | 3.5798520  |
| 51 | No | Show | 51 | H | -1.9111910 | 2.8675550  | 3.9830150  |
| 52 | No | Show | 52 | H | -4.1847820 | 2.2984760  | 4.8196310  |
| 53 | No | Show | 53 | C | -3.1354770 | -1.6185560 | -0.1903170 |
| 54 | No | Show | 54 | C | -4.1590370 | -1.7330310 | -1.1396030 |
| 55 | No | Show | 55 | C | -2.8296340 | -2.7284060 | 0.6140970  |
| 56 | No | Show | 56 | C | -4.8648790 | -2.9306490 | -1.2764500 |
| 57 | No | Show | 57 | H | -4.4097840 | -0.8878720 | -1.7747570 |
| 58 | No | Show | 58 | C | -3.5441680 | -3.9169240 | 0.4865680  |
| 59 | No | Show | 59 | H | -2.0277290 | -2.6579790 | 1.3473110  |
| 60 | No | Show | 60 | C | -4.5632450 | -4.0230240 | -0.4638390 |
| 61 | No | Show | 61 | H | -5.6547800 | -3.0058300 | -2.0198010 |
| 62 | No | Show | 62 | H | -3.2999510 | -4.7642850 | 1.1223750  |
| 63 | No | Show | 63 | H | -5.1146370 | -4.9534940 | -0.5719880 |
| 64 | No | Show | 64 | C | 3.4197620  | 4.9401190  | -0.5234350 |
| 65 | No | Show | 65 | H | 3.9075440  | 5.2370790  | 0.4076110  |
| 66 | No | Show | 66 | H | 4.1975140  | 4.7726420  | -1.2729470 |
| 67 | No | Show | 67 | H | 2.7265710  | 5.7096360  | -0.8583270 |

## 57

| Row | Highlight | Display | Tag | Symbol | X          | Y         | Z          |
|-----|-----------|---------|-----|--------|------------|-----------|------------|
| 1   | No        | Show    | 1   | H      | 1.5570560  | 1.7671020 | 2.1305080  |
| 2   | No        | Show    | 2   | C      | 0.8774140  | 1.7492490 | 1.2867890  |
| 3   | No        | Show    | 3   | C      | 1.2744140  | 1.5963120 | -0.0777450 |
| 4   | No        | Show    | 4   | C      | -0.5548580 | 1.7581950 | 1.3371250  |
| 5   | No        | Show    | 5   | C      | 0.0708600  | 1.5131190 | -0.8551920 |
| 6   | No        | Show    | 6   | H      | 2.3003040  | 1.4220620 | -0.4147860 |

---

|    |    |      |    |    |            |            |            |
|----|----|------|----|----|------------|------------|------------|
| 7  | No | Show | 7  | C  | -1.0811870 | 1.5940370  | 0.0107770  |
| 8  | No | Show | 8  | Fe | 0.1124460  | 0.0091640  | 0.5007350  |
| 9  | No | Show | 9  | C  | 0.0941470  | -1.6083360 | -0.7300140 |
| 10 | No | Show | 10 | C  | -1.1015540 | -1.5896680 | 0.0735410  |
| 11 | No | Show | 11 | C  | 1.2549680  | -1.6430130 | 0.1119830  |
| 12 | No | Show | 12 | H  | 0.1147350  | -1.5260450 | -1.8098300 |
| 13 | No | Show | 13 | C  | -0.6483080 | -1.6444340 | 1.4349200  |
| 14 | No | Show | 14 | C  | 0.7857700  | -1.6691640 | 1.4630220  |
| 15 | No | Show | 15 | H  | 2.2972160  | -1.5180660 | -0.1922280 |
| 16 | No | Show | 16 | H  | -1.3056920 | -1.5917190 | 2.2950240  |
| 17 | No | Show | 17 | H  | 1.4188850  | -1.6302940 | 2.3417290  |
| 18 | No | Show | 18 | H  | -1.1682260 | 1.7858320  | 2.2299170  |
| 19 | No | Show | 19 | H  | 0.0396160  | 1.3077840  | -1.9191740 |
| 20 | No | Show | 20 | O  | -3.6178250 | -1.4689090 | 0.6498780  |
| 21 | No | Show | 21 | H  | -3.7123050 | -0.5604960 | 0.9945740  |
| 22 | No | Show | 22 | O  | -2.7059400 | 0.0115810  | -1.1315510 |
| 23 | No | Show | 23 | H  | -3.4832070 | 0.0132690  | -1.7134390 |
| 24 | No | Show | 24 | O  | -2.9767230 | -2.3954420 | -1.4497350 |
| 25 | No | Show | 25 | H  | -3.8348300 | -2.7621290 | -1.1964290 |
| 26 | No | Show | 26 | B  | -2.6523410 | -1.4483730 | -0.4128960 |
| 27 | No | Show | 27 | B  | -2.6433350 | 1.3965700  | -0.3694050 |
| 28 | No | Show | 28 | O  | -3.2020330 | 2.3789500  | -1.2811150 |
| 29 | No | Show | 29 | H  | -2.5053060 | 2.7708500  | -1.8206650 |
| 30 | No | Show | 30 | O  | -3.4648480 | 1.3203840  | 0.8326570  |
| 31 | No | Show | 31 | H  | -4.2419490 | 1.8735450  | 0.6775420  |
| 32 | No | Show | 32 | Br | 4.5139270  | -0.0126070 | -0.4572190 |

## 58

| Row | Highlight |      | Display Tag |    | Symbol     | X          | Y          | Z |
|-----|-----------|------|-------------|----|------------|------------|------------|---|
| 1   | No        | Show | 1           | H  | 0.6282460  | 2.5446660  | 0.8242200  |   |
| 2   | No        | Show | 2           | C  | 0.3338510  | 2.0015940  | -0.0676930 |   |
| 3   | No        | Show | 3           | C  | 1.2220010  | 1.3022410  | -0.9280990 |   |
| 4   | No        | Show | 4           | C  | -1.0234300 | 1.7966080  | -0.4635350 |   |
| 5   | No        | Show | 5           | C  | 0.4250560  | 0.6408680  | -1.8974150 |   |
| 6   | No        | Show | 6           | H  | 2.2991230  | 1.1914100  | -0.8056320 |   |
| 7   | No        | Show | 7           | C  | -0.9423580 | 0.9339120  | -1.6200550 |   |
| 8   | No        | Show | 8           | Fe | -0.0829230 | -0.0177080 | -0.0191210 |   |
| 9   | No        | Show | 9           | C  | 0.2670260  | -2.0579540 | 0.1029100  |   |
| 10  | No        | Show | 10          | C  | -1.0838710 | -1.7839780 | 0.4715240  |   |
| 11  | No        | Show | 11          | C  | 1.1667060  | -1.3572450 | 0.9478060  |   |
| 12  | No        | Show | 12          | H  | 0.5466530  | -2.6432030 | -0.7659680 |   |
| 13  | No        | Show | 13          | C  | -0.9886360 | -0.8799720 | 1.5960220  |   |
| 14  | No        | Show | 14          | C  | 0.3823810  | -0.6326090 | 1.8824610  |   |
| 15  | No        | Show | 15          | H  | 2.2478350  | -1.2864860 | 0.8367390  |   |
| 16  | No        | Show | 16          | H  | -1.8292280 | -0.3857030 | 2.0696380  |   |

---

|    |    |      |    |    |            |            |            |
|----|----|------|----|----|------------|------------|------------|
| 17 | No | Show | 17 | H  | 0.7689760  | 0.0670510  | 2.6157040  |
| 18 | No | Show | 18 | H  | 0.7906000  | -0.0501660 | -2.6497500 |
| 19 | No | Show | 19 | H  | -1.7942930 | 0.5044460  | -2.1332840 |
| 20 | No | Show | 20 | O  | -2.8257470 | -3.6597140 | 0.4486250  |
| 21 | No | Show | 21 | H  | -3.6402620 | -3.4402690 | 0.9192510  |
| 22 | No | Show | 22 | O  | -3.5577350 | -1.4032110 | -0.0230600 |
| 23 | No | Show | 23 | H  | -3.8280210 | -1.1381540 | -0.9123110 |
| 24 | No | Show | 24 | O  | -2.1923110 | -2.6487730 | -1.6499980 |
| 25 | No | Show | 25 | H  | -2.5841950 | -3.5210390 | -1.7907990 |
| 26 | No | Show | 26 | B  | -2.4469580 | -2.3802470 | -0.2219920 |
| 27 | No | Show | 27 | Br | 5.0754630  | -0.0423880 | 0.0052630  |
| 28 | No | Show | 28 | B  | -2.3938330 | 2.4369460  | 0.2079630  |
| 29 | No | Show | 29 | O  | -3.5764180 | 1.6206830  | -0.0333450 |
| 30 | No | Show | 30 | H  | -3.3964940 | 0.6984000  | 0.2170640  |
| 31 | No | Show | 31 | O  | -2.0821880 | 2.6124820  | 1.6633270  |
| 32 | No | Show | 32 | H  | -2.9507490 | 2.7721480  | 2.0603390  |
| 33 | No | Show | 33 | O  | -2.6503790 | 3.7560240  | -0.4346230 |
| 34 | No | Show | 34 | H  | -2.0135750 | 4.3466680  | -0.0130850 |

#### 59a

| Row | Highlight |      | Display Tag |    | Symbol | X         | Y          | Z          |
|-----|-----------|------|-------------|----|--------|-----------|------------|------------|
| 1   | No        | Show | 1           | H  | -      | 3.5862740 | -2.3822810 | -2.4282920 |
| 2   | No        | Show | 2           | C  | -      | 3.6594900 | -1.4022500 | -1.9728500 |
| 3   | No        | Show | 3           | C  | -      | 4.8593630 | -0.7629490 | -1.5388820 |
| 4   | No        | Show | 4           | C  | -      | 2.5697260 | -0.5336690 | -1.6787900 |
| 5   | No        | Show | 5           | C  | -      | 4.5072220 | 0.5000730  | -0.9737670 |
| 6   | No        | Show | 6           | H  | -      | 5.8580490 | -1.1798850 | -1.5886800 |
| 7   | No        | Show | 7           | C  | -      | 3.0873490 | 0.6521500  | -1.0485330 |
| 8   | No        | Show | 8           | Fe | -      | 3.6044420 | -1.0318900 | 0.0412970  |
| 9   | No        | Show | 9           | C  | -      | 4.7433880 | -1.2578140 | 1.7151060  |
| 10  | No        | Show | 10          | C  | -      | 3.4855070 | -0.6876130 | 2.0679620  |
| 11  | No        | Show | 11          | C  | -      | 4.5003050 | -2.5256750 | 1.1013870  |
| 12  | No        | Show | 12          | H  | -      | 5.7120790 | -0.7906890 | 1.8447480  |
| 13  | No        | Show | 13          | C  | -      | 2.4629290 | -1.6102420 | 1.6873510  |
| 14  | No        | Show | 14          | H  | -      | 3.3235590 | 0.2835570  | 2.5188000  |
| 15  | No        | Show | 15          | C  | -      | 3.0911030 | -2.7396480 | 1.0724160  |
| 16  | No        | Show | 16          | H  | -      | 5.2513240 | -3.1880300 | 0.6882970  |
| 17  | No        | Show | 17          | H  | -      | 1.4033780 | -1.5177430 | 1.9342640  |
| 18  | No        | Show | 18          | H  | -      | 2.5848570 | -3.6000030 | 0.6522610  |
| 19  | No        | Show | 19          | H  | -      | 1.5300220 | -0.7120360 | -1.9338620 |
| 20  | No        | Show | 20          | H  | -      | 5.1917830 | 1.1966360  | -0.5044010 |
| 21  | No        | Show | 21          | C  | -      | 2.2851850 | 1.7868540  | -0.5482410 |
| 22  | No        | Show | 22          | C  | -      | 2.7829590 | 3.1193280  | -0.7030530 |
| 23  | No        | Show | 23          | C  | -      | 1.0713290 | 1.5836030  | 0.0652320  |
| 24  | No        | Show | 24          | N  | -      | 2.1491580 | 4.1809420  | -0.2832430 |

---

|    |    |      |    |    |            |            |            |
|----|----|------|----|----|------------|------------|------------|
| 25 | No | Show | 25 | C  | -0.3600830 | 2.7419570  | 0.5686900  |
| 26 | No | Show | 26 | N  | -0.9728800 | 3.9812740  | 0.3280990  |
| 27 | No | Show | 27 | Pd | -0.4066920 | -0.3944090 | 0.2739650  |
| 28 | No | Show | 28 | P  | 1.9512480  | -0.3956890 | -0.0150360 |
| 29 | No | Show | 29 | C  | 2.9703680  | -0.4046560 | 1.5123990  |
| 30 | No | Show | 30 | C  | 4.0120210  | -1.3176980 | 1.7265580  |
| 31 | No | Show | 31 | C  | 2.6562400  | 0.5311510  | 2.5114800  |
| 32 | No | Show | 32 | C  | 4.7306130  | -1.2973540 | 2.9233910  |
| 33 | No | Show | 33 | H  | 4.2682440  | -2.0467440 | 0.9628570  |
| 34 | No | Show | 34 | C  | 3.3864200  | 0.5521120  | 3.6989890  |
| 35 | No | Show | 35 | H  | 1.8571080  | 1.2497890  | 2.3391030  |
| 36 | No | Show | 36 | C  | 4.4203200  | -0.3629800 | 3.9116370  |
| 37 | No | Show | 37 | H  | 5.5354140  | -2.0118060 | 3.0793490  |
| 38 | No | Show | 38 | H  | 3.1417210  | 1.2857070  | 4.4633030  |
| 39 | No | Show | 39 | H  | 4.9814210  | -0.3476730 | 4.8429250  |
| 40 | No | Show | 40 | C  | 2.6236370  | 0.9774820  | -1.0245620 |
| 41 | No | Show | 41 | C  | 3.8541370  | 1.5874960  | -0.7533690 |
| 42 | No | Show | 42 | C  | 1.8719630  | 1.4135230  | -2.1235160 |
| 43 | No | Show | 43 | C  | 4.3285260  | 2.6098180  | -1.5763430 |
| 44 | No | Show | 44 | H  | 4.4408970  | 1.2717680  | 0.1050550  |
| 45 | No | Show | 45 | C  | 2.3518210  | 2.4273070  | -2.9509040 |
| 46 | No | Show | 46 | H  | 0.9011400  | 0.9654780  | -2.3228480 |
| 47 | No | Show | 47 | C  | 3.5820860  | 3.0287700  | -2.6784610 |
| 48 | No | Show | 48 | H  | 5.2827540  | 3.0806440  | -1.3528450 |
| 49 | No | Show | 49 | H  | 1.7581130  | 2.7568290  | -3.7999650 |
| 50 | No | Show | 50 | H  | 3.9528030  | 3.8267460  | -3.3170940 |
| 51 | No | Show | 51 | C  | 2.5213710  | -1.8997580 | -0.9168460 |
| 52 | No | Show | 52 | C  | 3.4458700  | -1.8651680 | -1.9688720 |
| 53 | No | Show | 53 | C  | 1.9754150  | -3.1371550 | -0.5400070 |
| 54 | No | Show | 54 | C  | 3.8183200  | -3.0412450 | -2.6236520 |
| 55 | No | Show | 55 | H  | 3.8770660  | -0.9184350 | -2.2819320 |
| 56 | No | Show | 56 | C  | 2.3579110  | -4.3122680 | -1.1834960 |
| 57 | No | Show | 57 | H  | 1.2471870  | -3.1800270 | 0.2686950  |
| 58 | No | Show | 58 | C  | 3.2798400  | -4.2668000 | -2.2321320 |
| 59 | No | Show | 59 | H  | 4.5337130  | -2.9964740 | -3.4412390 |
| 60 | No | Show | 60 | H  | 1.9298970  | -5.2622700 | -0.8729390 |
| 61 | No | Show | 61 | H  | 3.5718000  | -5.1808160 | -2.7430670 |
| 62 | No | Show | 62 | H  | -3.7287170 | 3.3180280  | -1.2024250 |
| 63 | No | Show | 63 | O  | 0.7132060  | 2.7318020  | 1.1930180  |
| 64 | No | Show | 64 | C  | -0.2930660 | 5.1773700  | 0.8073750  |
| 65 | No | Show | 65 | H  | -0.2082290 | 5.1526880  | 1.8969220  |
| 66 | No | Show | 66 | H  | 0.7160830  | 5.2230800  | 0.3921930  |
| 67 | No | Show | 67 | H  | -0.8811050 | 6.0369940  | 0.4898970  |
